# Supplementary material for: Polyandry contributes to Gonipterus platensis (Coleoptera: Curculionidae) rearing
Source: PeerJ journal article supplement (doi:10.7717/peerj.17929), 2024-08-22
Supplement: Graphic_abstract.pdf [file Graphic_abstract.pdf]

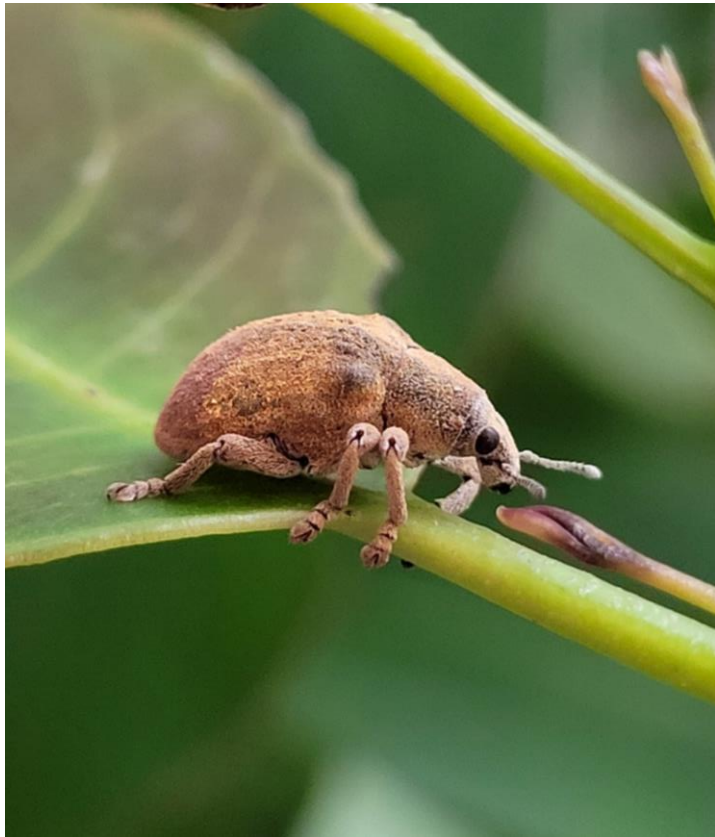

|                        | Monoandry | Polyandry no choice | Polyandry with choice |
|------------------------|-----------|---------------------|-----------------------|
| Pre-Oviposition period | —         | —                   | —                     |
| Oviposition period     | ×         | ◀▶                  | ✓                     |
| Fecundity              | ×         | ◀▶                  | ✓                     |
| Egg capsule size       | ×         | ✓                   | ✓                     |
| Fertility              | —         | —                   | —                     |
| Effect on progeny      | —         | —                   | —                     |

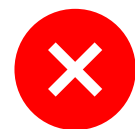

Negative influence

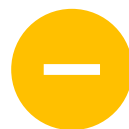

No influence

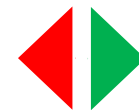

Not statistically different

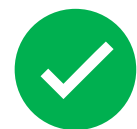

Positive influence
