# Supplementary material for: Polyandry contributes to Gonipterus platensis (Coleoptera: Curculionidae) rearing
Source: PeerJ. 2024 Aug 22;12:e17929. doi: 10.7717/peerj.17929 (PMC11344996; doi:10.7717/peerj.17929)
Supplement: Supplemental Information 3 [file peerj-12-17929-s003.xlsx]

## Sheet: Oviposition data
Treatment	Repet	Number egg capsules	date first egg laying	Date	Hatched larvae	Reatined larvae	Infertile eggs	Eggs Total
Monogamy	1	1	2021-08-22	2021-08-22	1	0	0	1
Monogamy	1	1	2021-08-22	2021-08-23	2	1	1	4
Monogamy	1	3	2021-08-22	2021-08-26	16	3	0	19
Monogamy	1	1	2021-08-22	2021-08-27	3	1	0	4
Monogamy	1	1	2021-08-22	2021-08-31	3	1	0	4
Monogamy	2	1	2021-08-23	2021-08-23	0	1	0	1
Monogamy	3	1	2021-08-09	2021-08-09	1	1	0	2
Monogamy	3	1	2021-08-09	2021-08-12	4	2	0	6
Monogamy	3	1	2021-08-09	2021-08-14	6	0	0	6
Monogamy	3	3	2021-08-09	2021-08-15	8	6	0	14
Monogamy	3	1	2021-08-09	2021-08-20	1	0	3	4
Monogamy	3	2	2021-08-09	2021-08-22	11	2	0	13
Monogamy	3	1	2021-08-09	2021-09-03	1	3	1	5
Monogamy	3	1	2021-08-09	2021-09-04	3	3	0	6
Monogamy	3	1	2021-08-09	2021-09-08	5	0	0	5
Monogamy	3	1	2021-08-09	2021-09-09	3	1	0	4
Monogamy	3	2	2021-08-09	2021-09-10	11	1	1	13
Monogamy	3	3	2021-08-09	2021-09-11	14	0	3	17
Monogamy	3	2	2021-08-09	2021-09-12	12	3	0	15
Monogamy	3	1	2021-08-09	2021-09-16	4	0	0	4
Monogamy	3	1	2021-08-09	2021-09-19	3	1	1	5
Monogamy	3	1	2021-08-09	2021-09-26	5	1	1	7
Monogamy	3	2	2021-08-09	2021-09-27	13	0	0	13
Monogamy	3	1	2021-08-09	2021-09-28	6	0	0	6
Monogamy	3	1	2021-08-09	2021-09-29	5	0	0	5
Monogamy	3	3	2021-08-09	2021-10-22	2	0	0	2
Monogamy	3	2	2021-08-09	2021-10-23	8	2	0	10
Monogamy	3	2	2021-08-09	2021-10-24	5	6	0	11
Monogamy	3	1	2021-08-09	2021-10-26	5	1	1	7
Monogamy	3	2	2021-08-09	2021-10-27	16	0	1	17
Monogamy	3	2	2021-08-09	2021-10-28	12	0	0	12
Monogamy	3	2	2021-08-09	2021-10-29	15	0	0	15
Monogamy	3	1	2021-08-09	2021-10-30	1	0	0	1
Monogamy	3	1	2021-08-09	2021-10-31	6	0	0	6
Monogamy	3	2	2021-08-09	2021-11-01	6	3	0	9
Monogamy	3	1	2021-08-09	2021-11-02	3	1	1	5
Monogamy	3	3	2021-08-09	2021-11-09	2	1	2	5
Monogamy	3	2	2021-08-09	2021-11-10	4	1	1	6
Monogamy	3	4	2021-08-09	2021-11-11	13	1	0	14
Monogamy	3	3	2021-08-09	2021-11-12	10	0	0	10
Monogamy	3	3	2021-08-09	2021-11-13	12	0	0	12
Monogamy	3	2	2021-08-09	2021-11-14	12	3	0	15
Monogamy	3	2	2021-08-09	2021-11-15	11	2	0	13
Monogamy	3	2	2021-08-09	2021-11-17	7	0	0	7
Monogamy	3	3	2021-08-09	2021-11-18	15	5	0	20
Monogamy	3	2	2021-08-09	2021-11-19	12	1	0	13
Monogamy	3	2	2021-08-09	2021-11-20	12	0	0	12
Monogamy	3	2	2021-08-09	2021-11-21	7	3	0	10
Monogamy	3	2	2021-08-09	2021-11-23	7	2	0	9
Monogamy	3	2	2021-08-09	2021-11-24	8	1	0	9
Monogamy	3	2	2021-08-09	2021-11-25	12	1	0	13
Monogamy	3	1	2021-08-09	2021-11-26	4	0	0	4
Monogamy	3	3	2021-08-09	2021-11-28	14	0	0	14
Monogamy	3	1	2021-08-09	2021-11-29	5	1	0	6
Monogamy	3	1	2021-08-09	2021-11-30	3	1	0	4
Monogamy	3	1	2021-08-09	2021-12-03	5	0	0	5
Monogamy	4	3	2021-08-02	2021-08-02	7	1	1	9
Monogamy	4	1	2021-08-02	2021-08-04	5	0	1	6
Monogamy	4	2	2021-08-02	2021-08-06	7	0	0	7
Monogamy	4	1	2021-08-02	2021-08-07	4	0	3	7
Monogamy	4	2	2021-08-02	2021-08-08	7	1	0	8
Monogamy	4	1	2021-08-02	2021-11-15	0	1	0	1
Monogamy	4	3	2021-08-02	2021-11-21	13	3	0	16
Monogamy	4	1	2021-08-02	2021-11-26	0	0	2	2
Monogamy	4	2	2021-08-02	2021-11-28	11	0	0	11
Monogamy	4	1	2021-08-02	2021-11-30	4	1	2	7
Monogamy	4	1	2021-08-02	2021-12-01	4	0	0	4
Monogamy	4	1	2021-08-02	2021-12-02	2	0	0	2
Monogamy	4	2	2021-08-02	2021-12-03	6	2	0	8
Monogamy	4	1	2021-08-02	2021-12-04	0	0	5	5
Monogamy	5	1	2021-07-05	2021-07-05	0	3	1	4
Monogamy	5	4	2021-07-05	2021-07-27	18	5	1	24
Monogamy	5	2	2021-07-05	2021-07-28	7	4	0	11
Monogamy	5	1	2021-07-05	2021-07-29	2	0	0	2
Monogamy	5	1	2021-07-05	2021-07-30	6	1	0	7
Monogamy	5	1	2021-07-05	2021-07-31	1	3	1	5
Monogamy	5	1	2021-07-05	2021-08-03	1	2	1	4
Monogamy	5	2	2021-07-05	2021-08-07	3	2	2	7
Monogamy	5	1	2021-07-05	2021-08-08	1	3	1	5
Monogamy	5	2	2021-07-05	2021-08-09	9	1	0	10
Monogamy	5	1	2021-07-05	2021-08-11	1	6	0	7
Monogamy	5	1	2021-07-05	2021-09-02	1	4	0	5
Monogamy	5	2	2021-07-05	2021-09-05	6	4	0	10
Monogamy	5	4	2021-07-05	2021-09-06	11	5	1	17
Monogamy	5	1	2021-07-05	2021-09-07	0	2	0	2
Monogamy	5	1	2021-07-05	2021-10-01	0	1	0	1
Monogamy	5	1	2021-07-05	2021-10-02	0	1	0	1
Monogamy	5	1	2021-07-05	2021-10-03	1	1	1	3
Monogamy	5	1	2021-07-05	2021-10-30	0	2	0	2
Monogamy	5	1	2021-07-05	2021-11-03	1	0	1	2
Monogamy	5	2	2021-07-05	2021-11-26	0	2	1	3
Monogamy	5	5	2021-07-05	2021-11-28	7	0	3	10
Monogamy	5	1	2021-07-05	2021-11-30	3	2	1	6
Monogamy	5	1	2021-07-05	2021-12-03	1	0	1	2
Monogamy	5	2	2021-07-05	2021-12-04	4	0	3	7
Monogamy	5	1	2021-07-05	2021-12-05	3	1	0	4
Monogamy	6	2	2021-08-01	2021-08-01	4	4	1	9
Monogamy	8	1	2021-07-02	2021-07-02	1	5	0	6
Monogamy	8	2	2021-07-02	2021-07-18	3	4	0	7
Monogamy	8	2	2021-07-02	2021-07-19	7	4	1	12
Monogamy	8	1	2021-07-02	2021-07-21	6	2	1	9
Monogamy	8	2	2021-07-02	2021-07-22	13	0	1	14
Monogamy	8	1	2021-07-02	2021-07-26	1	2	1	4
Monogamy	8	1	2021-07-02	2021-07-31	1	0	1	2
Monogamy	8	1	2021-07-02	2021-08-10	4	0	1	5
Monogamy	8	1	2021-07-02	2021-08-20	2	1	1	4
Monogamy	8	1	2021-07-02	2021-08-21	5	0	1	6
Monogamy	8	1	2021-07-02	2021-08-22	8	0	0	8
Monogamy	8	2	2021-07-02	2021-08-24	15	1	0	16
Monogamy	8	1	2021-07-02	2021-08-25	5	1	0	6
Monogamy	8	1	2021-07-02	2021-08-26	5	1	0	6
Monogamy	8	1	2021-07-02	2021-08-27	7	0	0	7
Monogamy	8	2	2021-07-02	2021-08-28	16	0	0	16
Monogamy	8	1	2021-07-02	2021-08-29	4	0	0	4
Monogamy	8	1	2021-07-02	2021-08-31	3	1	0	4
Monogamy	8	2	2021-07-02	2021-09-05	2	2	0	4
Monogamy	8	2	2021-07-02	2021-09-07	4	3	0	7
Monogamy	8	1	2021-07-02	2021-09-08	3	2	0	5
Monogamy	8	1	2021-07-02	2021-09-09	6	0	0	6
Monogamy	8	1	2021-07-02	2021-09-10	2	1	1	4
Monogamy	8	4	2021-07-02	2021-09-11	10	5	0	15
Monogamy	8	1	2021-07-02	2021-09-12	0	3	0	3
Monogamy	8	1	2021-07-02	2021-09-13	1	1	0	2
Monogamy	8	1	2021-07-02	2021-09-14	6	0	0	6
Monogamy	8	1	2021-07-02	2021-09-15	2	1	0	3
Monogamy	8	2	2021-07-02	2021-10-23	0	4	1	5
Monogamy	8	2	2021-07-02	2021-10-24	1	2	0	3
Monogamy	8	1	2021-07-02	2021-10-26	3	0	0	3
Monogamy	8	1	2021-07-02	2021-10-27	5	2	0	7
Monogamy	8	1	2021-07-02	2021-10-28	1	1	0	2
Monogamy	8	2	2021-07-02	2021-10-29	7	1	0	8
Monogamy	8	1	2021-07-02	2021-10-30	3	1	1	5
Monogamy	8	1	2021-07-02	2021-10-31	3	1	0	4
Monogamy	8	1	2021-07-02	2021-11-01	5	1	1	7
Monogamy	8	2	2021-07-02	2021-11-03	6	3	0	9
Monogamy	8	3	2021-07-02	2021-11-04	3	7	1	11
Monogamy	8	1	2021-07-02	2021-11-05	4	1	0	5
Monogamy	8	2	2021-07-02	2021-11-06	5	3	1	9
Monogamy	8	1	2021-07-02	2021-11-07	6	1	0	7
Monogamy	8	2	2021-07-02	2021-11-08	3	5	2	10
Monogamy	8	2	2021-07-02	2021-11-10	3	1	1	5
Monogamy	8	2	2021-07-02	2021-11-11	6	5	0	11
Monogamy	8	2	2021-07-02	2021-11-12	6	3	0	9
Monogamy	8	2	2021-07-02	2021-11-13	6	3	0	9
Monogamy	8	2	2021-07-02	2021-11-14	3	3	0	6
Monogamy	8	1	2021-07-02	2021-11-15	5	0	0	5
Monogamy	8	1	2021-07-02	2021-11-18	2	1	0	3
Monogamy	8	1	2021-07-02	2021-11-19	1	2	0	3
Monogamy	9	2	2021-08-02	2021-08-02	12	2	1	15
Monogamy	9	1	2021-08-02	2021-08-14	5	0	0	5
Monogamy	9	2	2021-08-02	2021-08-15	10	2	0	12
Monogamy	9	1	2021-08-02	2021-08-17	5	0	1	6
Monogamy	9	1	2021-08-02	2021-08-18	0	4	0	4
Monogamy	9	8	2021-08-02	2021-08-19	2	2	0	4
Monogamy	9	1	2021-08-02	2021-08-20	7	1	0	8
Monogamy	9	1	2021-08-02	2021-09-05	0	0	2	2
Monogamy	9	1	2021-08-02	2021-09-06	7	0	0	7
Monogamy	9	1	2021-08-02	2021-09-07	5	0	0	5
Monogamy	9	1	2021-08-02	2021-09-11	2	0	0	2
Monogamy	9	1	2021-08-02	2021-09-12	4	0	0	4
Monogamy	9	1	2021-08-02	2021-09-15	2	0	0	2
Monogamy	9	1	2021-08-02	2021-09-24	7	0	0	7
Monogamy	9	1	2021-08-02	2021-09-25	6	1	0	7
Monogamy	9	3	2021-08-02	2021-09-26	13	4	0	17
Monogamy	9	1	2021-08-02	2021-09-27	6	1	0	7
Monogamy	9	2	2021-08-02	2021-10-07	9	1	0	10
Monogamy	9	1	2021-08-02	2021-10-08	5	0	0	5
Monogamy	9	2	2021-08-02	2021-10-09	14	0	0	14
Monogamy	9	1	2021-08-02	2021-10-10	6	0	0	6
Monogamy	9	2	2021-08-02	2021-10-18	1	5	0	6
Monogamy	9	1	2021-08-02	2021-10-20	2	0	0	2
Monogamy	9	2	2021-08-02	2021-10-23	5	0	1	6
Monogamy	9	1	2021-08-02	2021-10-24	4	1	0	5
Monogamy	9	1	2021-08-02	2021-10-26	0	3	0	3
Monogamy	9	1	2021-08-02	2021-10-27	0	2	0	2
Monogamy	9	1	2021-08-02	2021-10-28	2	1	0	3
Monogamy	9	1	2021-08-02	2021-10-29	5	1	0	6
Monogamy	9	2	2021-08-02	2021-11-05	3	1	1	5
Monogamy	9	1	2021-08-02	2021-11-08	0	0	2	2
Monogamy	9	2	2021-08-02	2021-11-13	1	1	1	3
Monogamy	9	4	2021-08-02	2021-11-15	14	3	0	17
Monogamy	9	1	2021-08-02	2021-11-18	1	1	0	2
Monogamy	9	2	2021-08-02	2021-11-19	0	0	4	4
Monogamy	9	2	2021-08-02	2021-11-20	1	4	3	8
Monogamy	9	1	2021-08-02	2021-12-07	4			4
Monogamy	9	1	2021-08-02	2021-12-08	1			1
Monogamy	10	1	2021-08-02	2021-08-02	0	2	0	2
Monogamy	10	1	2021-08-02	2021-08-21	0	1	0	1
Polyandry without choice	2	2	2021-05-21	2021-05-21	1	9	1	11
Polyandry without choice	2	1	2021-05-21	2021-05-24	0	2	0	2
Polyandry without choice	2	1	2021-05-21	2021-07-04	5	1	0	6
Polyandry without choice	2	1	2021-05-21	2021-07-05	5	0	0	5
Polyandry without choice	2	2	2021-05-21	2021-07-07	11	0	0	11
Polyandry without choice	2	1	2021-05-21	2021-07-08	5	0	0	5
Polyandry without choice	2	2	2021-05-21	2021-07-11	7	3	0	10
Polyandry without choice	2	1	2021-05-21	2021-07-12	2	0	0	2
Polyandry without choice	2	2	2021-05-21	2021-07-14	8	1	0	9
Polyandry without choice	2	1	2021-05-21	2021-07-15	2	2	1	5
Polyandry without choice	2	2	2021-05-21	2021-08-07	6	4	1	11
Polyandry without choice	2	1	2021-05-21	2021-08-08	4	3	1	8
Polyandry without choice	2	1	2021-05-21	2021-08-09	3	0	0	3
Polyandry without choice	2	1	2021-05-21	2021-08-14	6	1	0	7
Polyandry without choice	2	1	2021-05-21	2021-08-15	7	0	0	7
Polyandry without choice	2	1	2021-05-21	2021-08-16	6	0	0	6
Polyandry without choice	2	1	2021-05-21	2021-08-20	1	3	0	4
Polyandry without choice	2	3	2021-05-21	2021-08-21	14	2	0	16
Polyandry without choice	2	2	2021-05-21	2021-08-24	6	2	0	8
Polyandry without choice	2	1	2021-05-21	2021-08-25	6	0	0	6
Polyandry without choice	2	3	2021-05-21	2021-08-26	12	2	1	15
Polyandry without choice	2	2	2021-05-21	2021-08-27	11	1	0	12
Polyandry without choice	2	1	2021-05-21	2021-08-28	7	0	0	7
Polyandry without choice	2	1	2021-05-21	2021-09-11	0	2	3	5
Polyandry without choice	2	2	2021-05-21	2021-09-12	2	1	1	4
Polyandry without choice	2	1	2021-05-21	2021-09-13	1	0	0	1
Polyandry without choice	2	1	2021-05-21	2021-09-25	5	0	0	5
Polyandry without choice	2	2	2021-05-21	2021-09-26	8	0	0	8
Polyandry without choice	2	2	2021-05-21	2021-09-27	5	1	0	6
Polyandry without choice	2	1	2021-05-21	2021-09-28	5	0	0	5
Polyandry without choice	2	2	2021-05-21	2021-10-02	7	2	0	9
Polyandry without choice	2	2	2021-05-21	2021-10-03	10	1	0	11
Polyandry without choice	2	1	2021-05-21	2021-10-04	7	0	0	7
Polyandry without choice	2	2	2021-05-21	2021-10-05	11	0	0	11
Polyandry without choice	2	1	2021-05-21	2021-10-07	5	1	0	6
Polyandry without choice	2	1	2021-05-21	2021-11-04	2	1	0	3
Polyandry without choice	2	3	2021-05-21	2021-11-06	9	4	0	13
Polyandry without choice	2	1	2021-05-21	2021-11-07	2	3	0	5
Polyandry without choice	2	2	2021-05-21	2021-11-08	7	0	0	7
Polyandry without choice	2	2	2021-05-21	2021-11-10	2	2	0	4
Polyandry without choice	2	3	2021-05-21	2021-11-11	9	3	1	13
Polyandry without choice	2	3	2021-05-21	2021-11-12	5	3	2	10
Polyandry without choice	2	4	2021-05-21	2021-11-13	3	4	5	12
Polyandry without choice	2	3	2021-05-21	2021-11-15	8	3	0	11
Polyandry without choice	2	4	2021-05-21	2021-11-17	15	4	0	19
Polyandry without choice	2	2	2021-05-21	2021-11-18	11	1	0	12
Polyandry without choice	2	2	2021-05-21	2021-11-19	9	2	0	11
Polyandry without choice	2	3	2021-05-21	2021-11-20	7	5	0	12
Polyandry without choice	2	2	2021-05-21	2021-11-23	3	2	1	6
Polyandry without choice	2	2	2021-05-21	2021-11-24	10	2	0	12
Polyandry without choice	2	2	2021-05-21	2021-11-25	16	1	1	18
Polyandry without choice	2	3	2021-05-21	2021-11-26	11	2	0	13
Polyandry without choice	2	1	2021-05-21	2021-11-28	3	0	0	3
Polyandry without choice	2	1	2021-05-21	2021-12-01	2	1	0	3
Polyandry without choice	2	1	2021-05-21	2021-12-02	0	0	2	2
Polyandry without choice	2	1	2021-05-21	2021-12-03	0	0	2	2
Polyandry without choice	3	3	2021-07-27	2021-07-27	18	4	0	22
Polyandry without choice	3	1	2021-07-27	2021-08-04	0	0	6	6
Polyandry without choice	3	1	2021-07-27	2021-08-07	3	0	0	3
Polyandry without choice	3	1	2021-07-27	2021-08-15	2	0	3	5
Polyandry without choice	3	1	2021-07-27	2021-08-16	9	1	0	10
Polyandry without choice	3	1	2021-07-27	2021-08-18	1	7	0	8
Polyandry without choice	3	1	2021-07-27	2021-08-20	1	4	3	8
Polyandry without choice	3	1	2021-07-27	2021-08-22	7	1	0	8
Polyandry without choice	3	1	2021-07-27	2021-08-24	6	0	0	6
Polyandry without choice	3	1	2021-07-27	2021-08-25	3	0	3	6
Polyandry without choice	3	1	2021-07-27	2021-08-27	6	0	0	6
Polyandry without choice	3	1	2021-07-27	2021-08-28	7	0	0	7
Polyandry without choice	3	1	2021-07-27	2021-09-01	2	4	1	7
Polyandry without choice	3	1	2021-07-27	2021-09-11	1	3	2	6
Polyandry without choice	3	1	2021-07-27	2021-09-12	8	0	0	8
Polyandry without choice	3	1	2021-07-27	2021-09-13	8	0	0	8
Polyandry without choice	3	1	2021-07-27	2021-09-14	6	1	0	7
Polyandry without choice	3	1	2021-07-27	2021-09-17	4	3	0	7
Polyandry without choice	3	1	2021-07-27	2021-10-03	0	0	3	3
Polyandry without choice	3	1	2021-07-27	2021-10-08	5	1	0	6
Polyandry without choice	3	1	2021-07-27	2021-11-06	7	0	0	7
Polyandry without choice	3	2	2021-07-27	2021-11-07	4	9	0	13
Polyandry without choice	3	2	2021-07-27	2021-11-08	5	4	2	11
Polyandry without choice	3	1	2021-07-27	2021-11-11	2	1	3	6
Polyandry without choice	3	2	2021-07-27	2021-11-13	0	4	1	5
Polyandry without choice	3	3	2021-07-27	2021-11-14	3	0	0	3
Polyandry without choice	5	3	2021-07-11	2021-07-11	14	2	0	16
Polyandry without choice	5	1	2021-07-11	2021-07-12	7	0	0	7
Polyandry without choice	5	1	2021-07-11	2021-07-13	5	1	0	6
Polyandry without choice	5	2	2021-07-11	2021-07-14	12	0	0	12
Polyandry without choice	5	1	2021-07-11	2021-07-17	1	0	0	1
Polyandry without choice	5	1	2021-07-11	2021-08-07	1	4	1	6
Polyandry without choice	5	1	2021-07-11	2021-08-08	1	2	1	4
Polyandry without choice	5	1	2021-07-11	2021-08-09	5	0	0	5
Polyandry without choice	5	1	2021-07-11	2021-08-13	0	0	2	2
Polyandry without choice	7	1	2021-10-05	2021-10-05	2	2	1	5
Polyandry without choice	7	1	2021-10-05	2021-10-10	0	2	0	2
Polyandry without choice	7	2	2021-10-05	2021-10-11	11	0	0	11
Polyandry without choice	7	1	2021-10-05	2021-10-12	7	0	0	7
Polyandry without choice	7	1	2021-10-05	2021-10-31	0	0	1	1
Polyandry without choice	8	1	2021-08-07	2021-08-07	7	1	0	8
Polyandry without choice	8	2	2021-08-07	2021-08-08	10	1	0	11
Polyandry without choice	8	2	2021-08-07	2021-08-09	10	2	0	12
Polyandry without choice	8	1	2021-08-07	2021-08-10	7	0	0	7
Polyandry without choice	8	1	2021-08-07	2021-08-11	5	3	0	8
Polyandry without choice	8	1	2021-08-07	2021-08-13	8	0	0	8
Polyandry without choice	8	1	2021-08-07	2021-08-14	6	1	2	9
Polyandry without choice	8	2	2021-08-07	2021-08-15	16	0	0	16
Polyandry without choice	8	1	2021-08-07	2021-08-17	4	1	0	5
Polyandry without choice	8	1	2021-08-07	2021-08-18	1	2	3	6
Polyandry without choice	8	2	2021-08-07	2021-09-07	9	1	1	11
Polyandry without choice	8	1	2021-08-07	2021-09-08	6	2	0	8
Polyandry without choice	8	1	2021-08-07	2021-09-09	7	0	0	7
Polyandry without choice	8	2	2021-08-07	2021-09-10	7	3	1	11
Polyandry without choice	8	1	2021-08-07	2021-09-11	6	0	1	7
Polyandry without choice	8	3	2021-08-07	2021-09-12	19	0	0	19
Polyandry without choice	8	2	2021-08-07	2021-09-14	17	0	0	17
Polyandry without choice	8	1	2021-08-07	2021-09-15	2	0	0	2
Polyandry without choice	8	1	2021-08-07	2021-09-19	6	0	0	6
Polyandry without choice	8	4	2021-08-07	2021-09-20	20	3	0	23
Polyandry without choice	8	1	2021-08-07	2021-09-22	2	2	0	4
Polyandry without choice	8	1	2021-08-07	2021-09-23	8	0	0	8
Polyandry without choice	8	2	2021-08-07	2021-09-24	11	2	0	13
Polyandry without choice	8	2	2021-08-07	2021-09-25	11	0	0	11
Polyandry without choice	8	2	2021-08-07	2021-09-26	11	0	0	11
Polyandry without choice	8	1	2021-08-07	2021-09-27	3	0	0	3
Polyandry without choice	8	1	2021-08-07	2021-09-28	4	0	2	6
Polyandry without choice	8	1	2021-08-07	2021-09-29	4	1	0	5
Polyandry without choice	8	1	2021-08-07	2021-09-30	3	0	0	3
Polyandry without choice	8	1	2021-08-07	2021-10-10	5	0	0	5
Polyandry without choice	8	2	2021-08-07	2021-10-13	9	0	0	9
Polyandry without choice	8	1	2021-08-07	2021-10-14	2	1	0	3
Polyandry without choice	8	1	2021-08-07	2021-10-23	0	0	2	2
Polyandry without choice	8	1	2021-08-07	2021-10-24	3	1	1	5
Polyandry without choice	8	1	2021-08-07	2021-10-25	3	2	0	5
Polyandry without choice	8	2	2021-08-07	2021-10-26	7	3	0	10
Polyandry without choice	8	2	2021-08-07	2021-10-27	13	2	0	15
Polyandry without choice	8	2	2021-08-07	2021-10-28	7	1	0	8
Polyandry without choice	8	3	2021-08-07	2021-10-29	5	1	1	7
Polyandry without choice	8	1	2021-08-07	2021-10-31	3	0	0	3
Polyandry without choice	8	1	2021-08-07	2021-11-08	0	1	5	6
Polyandry without choice	8	1	2021-08-07	2021-11-13	0	1	4	5
Polyandry without choice	8	1	2021-08-07	2021-11-14	1	3	1	5
Polyandry without choice	8	2	2021-08-07	2021-11-15	8	5	1	14
Polyandry without choice	8	1	2021-08-07	2021-11-17	6	1	1	8
Polyandry without choice	8	1	2021-08-07	2021-12-05	0	0	2	2
Polyandry without choice	9	5	2021-07-27	2021-07-27	15	0	0	15
Polyandry without choice	9	2	2021-07-27	2021-07-28	2	3	3	8
Polyandry without choice	9	2	2021-07-27	2021-07-29	2	0	0	2
Polyandry without choice	9	1	2021-07-27	2021-07-30	5	0	0	5
Polyandry without choice	9	1	2021-07-27	2021-07-31	6	0	0	6
Polyandry without choice	9	1	2021-07-27	2021-08-09	0	0	2	2
Polyandry without choice	9	1	2021-07-27	2021-08-13	0	0	1	1
Polyandry without choice	9	2	2021-07-27	2021-09-20	1	0	0	1
Polyandry without choice	9	1	2021-07-27	2021-09-21	4	1	0	5
Polyandry without choice	9	1	2021-07-27	2021-10-11	1	0	0	1
Polyandry without choice	9	1	2021-07-27	2021-10-13	6	0	0	6
Polyandry without choice	9	2	2021-07-27	2021-10-15	8	0	0	8
Polyandry without choice	9	1	2021-07-27	2021-10-18	0	1	0	1
Polyandry without choice	9	2	2021-07-27	2021-11-23	3	2	1	6
Polyandry without choice	9	3	2021-07-27	2021-11-24	9	0	0	9
Polyandry without choice	9	1	2021-07-27	2021-11-25	4	2	0	6
Polyandry without choice	9	1	2021-07-27	2021-11-26	1	2	1	4
Polyandry without choice	9	2	2021-07-27	2021-11-27	10	1	0	11
Polyandry without choice	9	2	2021-07-27	2021-11-28	5	5	0	10
Polyandry without choice	9	1	2021-07-27	2021-11-29	5	1	0	6
Polyandry without choice	9	3	2021-07-27	2021-11-30	13	3	1	17
Polyandry without choice	9	2	2021-07-27	2021-12-01	10	2	1	13
Polyandry without choice	9	3	2021-07-27	2021-12-02	15	2	1	18
Polyandry without choice	9	3	2021-07-27	2021-12-03	12	1	0	13
Polyandry without choice	9	2	2021-07-27	2021-12-04	10	2	0	12
Polyandry without choice	9	3	2021-07-27	2021-12-05	10	4	0	14
Polyandry without choice	9	1	2021-07-27	2021-12-07	4			4
Polyandry without choice	9	1	2021-07-27	2021-12-08	2			2
Polyandry without choice	9	1	2021-07-27	2021-12-09	4			4
Polyandry without choice	10	3	2021-07-13	2021-07-13	14	0	2	16
Polyandry without choice	10	1	2021-07-13	2021-07-14	5	0	0	5
Polyandry without choice	10	1	2021-07-13	2021-07-15	0	3	0	3
Polyandry without choice	10	1	2021-07-13	2021-07-17	1	0	1	2
Polyandry without choice	10	2	2021-07-13	2021-07-18	10			10
Polyandry without choice	10	2	2021-07-13	2021-07-19	12	0	0	12
Polyandry without choice	10	1	2021-07-13	2021-07-21	6	0	0	6
Polyandry without choice	10	1	2021-07-13	2021-07-23	4	3	0	7
Polyandry without choice	10	1	2021-07-13	2021-07-26	3	3	0	6
Polyandry without choice	10	1	2021-07-13	2021-08-03	0	0	3	3
Polyandry without choice	10	1	2021-07-13	2021-08-07	0	2	0	2
Polyandry without choice	10	1	2021-07-13	2021-08-09	1	2	0	3
Polyandry without choice	10	2	2021-07-13	2021-08-22	12	0	0	12
Polyandry without choice	10	1	2021-07-13	2021-08-23	8	0	0	8
Polyandry without choice	10	2	2021-07-13	2021-08-24	9	1	0	10
Polyandry without choice	10	2	2021-07-13	2021-08-25	14	0	0	14
Polyandry without choice	10	2	2021-07-13	2021-08-26	8	0	1	9
Polyandry without choice	10	2	2021-07-13	2021-08-27	11	0	0	11
Polyandry without choice	10	2	2021-07-13	2021-08-28	12	0	0	12
Polyandry without choice	10	1	2021-07-13	2021-08-29	7	0	0	7
Polyandry without choice	10	1	2021-07-13	2021-08-31	2	4	0	6
Polyandry without choice	10	2	2021-07-13	2021-09-01	9	0	0	9
Polyandry without choice	10	1	2021-07-13	2021-09-03	3	1	1	5
Polyandry without choice	10	1	2021-07-13	2021-09-13	3	0	0	3
Polyandry without choice	10	1	2021-07-13	2021-09-14	6	0	0	6
Polyandry without choice	10	1	2021-07-13	2021-09-15	6	0	0	6
Polyandry without choice	10	2	2021-07-13	2021-09-27	14	0	0	14
Polyandry without choice	10	2	2021-07-13	2021-09-28	12	0	0	12
Polyandry without choice	10	1	2021-07-13	2021-09-29	5	0	0	5
Polyandry without choice	10	1	2021-07-13	2021-09-30	4	0	0	4
Polyandry without choice	10	2	2021-07-13	2021-10-16	11	0	0	11
Polyandry without choice	10	4	2021-07-13	2021-10-17	19	3	0	22
Polyandry without choice	10	1	2021-07-13	2021-10-18	7	0	0	7
Polyandry without choice	10	1	2021-07-13	2021-10-19	5	1	0	6
Polyandry without choice	10	3	2021-07-13	2021-10-21	11	3	0	14
Polyandry without choice	10	3	2021-07-13	2021-10-23	16	2	0	18
Polyandry without choice	10	2	2021-07-13	2021-10-24	9	2	0	11
Polyandry without choice	10	1	2021-07-13	2021-10-27	5	1	0	6
Polyandry without choice	10	1	2021-07-13	2021-10-31	0	2	2	4
Polyandry without choice	10	1	2021-07-13	2021-11-26	2	0	1	3
Polyandry without choice	10	2	2021-07-13	2021-11-27	13	0	0	13
Polyandry without choice	10	2	2021-07-13	2021-11-28	11	1	0	12
Polyandry without choice	10	1	2021-07-13	2021-11-30	6	1	0	7
Polyandry without choice	10	1	2021-07-13	2021-12-03	5	1	0	6
Polyandry without choice	10	1	2021-07-13	2021-12-05	4	1	0	5
Polyandry with choice	1	1	2021-05-07	2021-05-07	6	2	3	11
Polyandry with choice	1	1	2021-05-07	2021-05-09	0	0	8	8
Polyandry with choice	1	1	2021-05-07	2021-05-14	0	6	0	6
Polyandry with choice	1	1	2021-05-07	2021-06-24	2	3	2	7
Polyandry with choice	1	2	2021-05-07	2021-07-16	5	2	2	9
Polyandry with choice	1	1	2021-05-07	2021-07-17	6	0	0	6
Polyandry with choice	1	1	2021-05-07	2021-07-18	7	1	1	9
Polyandry with choice	1	1	2021-05-07	2021-07-19	3	5	1	9
Polyandry with choice	1	1	2021-05-07	2021-07-23	6	4	0	10
Polyandry with choice	1	1	2021-05-07	2021-07-24	1	2	0	3
Polyandry with choice	1	1	2021-05-07	2021-07-26	2	5	0	7
Polyandry with choice	1	1	2021-05-07	2021-07-28	3	6	0	9
Polyandry with choice	1	1	2021-05-07	2021-08-03	0	2	1	3
Polyandry with choice	1	1	2021-05-07	2021-08-08	4	1	3	8
Polyandry with choice	1	2	2021-05-07	2021-08-09	16	0	1	17
Polyandry with choice	1	1	2021-05-07	2021-08-10	7	1	0	8
Polyandry with choice	1	1	2021-05-07	2021-08-11	1	5	1	7
Polyandry with choice	1	1	2021-05-07	2021-08-12	9	1	0	10
Polyandry with choice	1	1	2021-05-07	2021-08-15	2	3	0	5
Polyandry with choice	1	1	2021-05-07	2021-08-18	0	4	1	5
Polyandry with choice	1	1	2021-05-07	2021-08-22	2	1	0	3
Polyandry with choice	1	1	2021-05-07	2021-08-24	7	0	1	8
Polyandry with choice	1	1	2021-05-07	2021-08-27	4	2	0	6
Polyandry with choice	1	1	2021-05-07	2021-09-03	1	5	3	9
Polyandry with choice	1	1	2021-05-07	2021-09-04	2	3	3	8
Polyandry with choice	1	2	2021-05-07	2021-09-05	9	3	0	12
Polyandry with choice	1	2	2021-05-07	2021-09-07	10	1	2	13
Polyandry with choice	1	1	2021-05-07	2021-09-09	2	2	2	6
Polyandry with choice	1	2	2021-05-07	2021-09-10	14	0	1	15
Polyandry with choice	1	1	2021-05-07	2021-09-12	6	0	0	6
Polyandry with choice	1	1	2021-05-07	2021-09-15	1	0	4	5
Polyandry with choice	1	1	2021-05-07	2021-09-17	1	2	1	4
Polyandry with choice	1	1	2021-05-07	2021-09-20	3	1	0	4
Polyandry with choice	1	1	2021-05-07	2021-09-24	0	2	0	2
Polyandry with choice	1	2	2021-05-07	2021-09-25	8	3	0	11
Polyandry with choice	1	2	2021-05-07	2021-09-26	9	0	0	9
Polyandry with choice	1	2	2021-05-07	2021-09-27	11	1	0	12
Polyandry with choice	1	2	2021-05-07	2021-09-29	8	5	0	13
Polyandry with choice	1	1	2021-05-07	2021-10-01	4	2	0	6
Polyandry with choice	1	1	2021-05-07	2021-10-02	2	1	0	3
Polyandry with choice	1	1	2021-05-07	2021-10-09	3	0	3	6
Polyandry with choice	1	2	2021-05-07	2021-10-10	8	2	0	10
Polyandry with choice	1	1	2021-05-07	2021-10-12	0	3	0	3
Polyandry with choice	1	1	2021-05-07	2021-10-13	5	0	0	5
Polyandry with choice	1	1	2021-05-07	2021-10-15	5	1	0	6
Polyandry with choice	1	1	2021-05-07	2021-10-29	3	0	1	4
Polyandry with choice	1	1	2021-05-07	2021-10-31	0	2	2	4
Polyandry with choice	1	1	2021-05-07	2021-11-02	0	0	2	2
Polyandry with choice	1	1	2021-05-07	2021-11-03	0	0	1	1
Polyandry with choice	1	1	2021-05-07	2021-11-05	1	4	0	5
Polyandry with choice	1	1	2021-05-07	2021-11-06	0	2	2	4
Polyandry with choice	1	1	2021-05-07	2021-11-08	1	3	0	4
Polyandry with choice	1	2	2021-05-07	2021-11-09	3	2	0	5
Polyandry with choice	1	2	2021-05-07	2021-11-10	7	3	0	10
Polyandry with choice	1	2	2021-05-07	2021-11-11	5	3	0	8
Polyandry with choice	1	1	2021-05-07	2021-11-12	4	1	1	6
Polyandry with choice	1	3	2021-05-07	2021-11-13	5	2	2	9
Polyandry with choice	1	1	2021-05-07	2021-11-14	2	4	0	6
Polyandry with choice	1	1	2021-05-07	2021-11-18	3	1	0	4
Polyandry with choice	1	1	2021-05-07	2021-11-19	3	2	0	5
Polyandry with choice	1	1	2021-05-07	2021-11-20	12	0	0	12
Polyandry with choice	1	1	2021-05-07	2021-11-21	8	2	1	11
Polyandry with choice	1	2	2021-05-07	2021-11-23	11	0	1	12
Polyandry with choice	1	1	2021-05-07	2021-11-24	9	3	0	12
Polyandry with choice	1	2	2021-05-07	2021-11-25	1	1	0	2
Polyandry with choice	1	1	2021-05-07	2021-11-26	3	0	2	5
Polyandry with choice	1	1	2021-05-07	2021-11-27	7	1	0	8
Polyandry with choice	1	3	2021-05-07	2021-11-28	9	2	0	11
Polyandry with choice	1	1	2021-05-07	2021-11-29	3	1	0	4
Polyandry with choice	1	1	2021-05-07	2021-12-01	6	1	1	8
Polyandry with choice	1	1	2021-05-07	2021-12-03	0	0	2	2
Polyandry with choice	1	1	2021-05-07	2021-12-07	0			0
Polyandry with choice	1	1	2021-05-07	2021-12-10	5			5
Polyandry with choice	2	1	2021-05-14	2021-05-14	3	1	0	4
Polyandry with choice	2	1	2021-05-14	2021-05-15	1	0	3	4
Polyandry with choice	2	2	2021-05-14	2021-05-16	2	3	1	6
Polyandry with choice	2	5	2021-05-14	2021-05-18	14	5	4	23
Polyandry with choice	2	2	2021-05-14	2021-05-19	0	2	0	2
Polyandry with choice	2	1	2021-05-14	2021-05-29	0	0	1	1
Polyandry with choice	2	1	2021-05-14	2021-05-31	2	0	1	3
Polyandry with choice	2	1	2021-05-14	2021-06-01	2	2	0	4
Polyandry with choice	2	1	2021-05-14	2021-06-02	2	0	2	4
Polyandry with choice	2	1	2021-05-14	2021-06-03	3	1	0	4
Polyandry with choice	2	1	2021-05-14	2021-06-10	2	0	5	7
Polyandry with choice	2	1	2021-05-14	2021-06-11	1	0	0	1
Polyandry with choice	2	1	2021-05-14	2021-06-12	2	1	1	4
Polyandry with choice	2	2	2021-05-14	2021-06-14	6	2	0	8
Polyandry with choice	2	1	2021-05-14	2021-06-15	1	2	1	4
Polyandry with choice	2	1	2021-05-14	2021-06-19	3	0	2	5
Polyandry with choice	2	2	2021-05-14	2021-06-21	3	0	3	6
Polyandry with choice	2	1	2021-05-14	2021-06-22	6	0	3	9
Polyandry with choice	2	1	2021-05-14	2021-06-24	3	1	0	4
Polyandry with choice	2	2	2021-05-14	2021-06-25	8	2	2	12
Polyandry with choice	2	1	2021-05-14	2021-06-26	4	1	0	5
Polyandry with choice	2	2	2021-05-14	2021-06-27	0	3	2	5
Polyandry with choice	2	3	2021-05-14	2021-07-05	10	5	1	16
Polyandry with choice	2	1	2021-05-14	2021-07-06	6	0	0	6
Polyandry with choice	2	3	2021-05-14	2021-07-26	13	2	2	17
Polyandry with choice	2	1	2021-05-14	2021-07-28	5	0	0	5
Polyandry with choice	2	3	2021-05-14	2021-07-29	11	5	2	18
Polyandry with choice	2	2	2021-05-14	2021-08-08	4	2	2	8
Polyandry with choice	2	2	2021-05-14	2021-08-10	6	3	1	10
Polyandry with choice	2	1	2021-05-14	2021-08-11	6	0	0	6
Polyandry with choice	2	1	2021-05-14	2021-08-13	5	0	1	6
Polyandry with choice	2	2	2021-05-14	2021-08-15	4	3	2	9
Polyandry with choice	2	1	2021-05-14	2021-08-18	1	1	0	2
Polyandry with choice	2	2	2021-05-14	2021-08-21	6	3	2	11
Polyandry with choice	2	1	2021-05-14	2021-08-22	4	0	0	4
Polyandry with choice	2	1	2021-05-14	2021-08-24	4	2	0	6
Polyandry with choice	2	1	2021-05-14	2021-08-25	2	4	0	6
Polyandry with choice	2	1	2021-05-14	2021-08-26	1	0	0	1
Polyandry with choice	2	3	2021-05-14	2021-08-28	14	0	2	16
Polyandry with choice	2	1	2021-05-14	2021-08-29	2	2	0	4
Polyandry with choice	2	1	2021-05-14	2021-08-30	6	0	0	6
Polyandry with choice	2	2	2021-05-14	2021-09-23	7	0	0	7
Polyandry with choice	2	2	2021-05-14	2021-09-24	8	2	0	10
Polyandry with choice	2	2	2021-05-14	2021-09-25	10	1	0	11
Polyandry with choice	2	1	2021-05-14	2021-09-26	4	1	0	5
Polyandry with choice	2	2	2021-05-14	2021-09-28	10	3	0	13
Polyandry with choice	2	1	2021-05-14	2021-09-29	4	2	0	6
Polyandry with choice	2	1	2021-05-14	2021-10-01	3	2	0	5
Polyandry with choice	2	3	2021-05-14	2021-10-12	15	0	0	15
Polyandry with choice	2	2	2021-05-14	2021-10-14	5	0	0	5
Polyandry with choice	2	1	2021-05-14	2021-10-15	8	0	0	8
Polyandry with choice	2	1	2021-05-14	2021-10-18	5	1	0	6
Polyandry with choice	2	1	2021-05-14	2021-10-19	3	0	1	4
Polyandry with choice	2	1	2021-05-14	2021-10-20	9	1	0	10
Polyandry with choice	2	3	2021-05-14	2021-10-21	11	5	0	16
Polyandry with choice	2	2	2021-05-14	2021-10-22	10	2	0	12
Polyandry with choice	2	3	2021-05-14	2021-10-23	16	2	0	18
Polyandry with choice	2	2	2021-05-14	2021-10-24	8	3	0	11
Polyandry with choice	2	3	2021-05-14	2021-10-25	5	1	0	6
Polyandry with choice	2	3	2021-05-14	2021-10-26	16	2	0	18
Polyandry with choice	2	2	2021-05-14	2021-10-27	7	2	0	9
Polyandry with choice	2	2	2021-05-14	2021-10-28	8	2	0	10
Polyandry with choice	2	2	2021-05-14	2021-10-29	7	0	0	7
Polyandry with choice	2	1	2021-05-14	2021-10-31	2	1	2	5
Polyandry with choice	2	1	2021-05-14	2021-11-02	2	1	1	4
Polyandry with choice	2	1	2021-05-14	2021-11-03	3	2	0	5
Polyandry with choice	2	3	2021-05-14	2021-11-04	14	5	0	19
Polyandry with choice	2	1	2021-05-14	2021-11-05	4	3	0	7
Polyandry with choice	2	1	2021-05-14	2021-11-06	1	3	0	4
Polyandry with choice	2	3	2021-05-14	2021-11-10	4	2	1	7
Polyandry with choice	2	3	2021-05-14	2021-11-11	6	1	0	7
Polyandry with choice	2	4	2021-05-14	2021-11-12	6	2	2	10
Polyandry with choice	2	3	2021-05-14	2021-11-14	2	10	0	12
Polyandry with choice	2	2	2021-05-14	2021-11-15	3	3	0	6
Polyandry with choice	2	2	2021-05-14	2021-11-16	3	3	0	6
Polyandry with choice	2	2	2021-05-14	2021-11-17	4	4	0	8
Polyandry with choice	2	4	2021-05-14	2021-11-18	16	3	0	19
Polyandry with choice	2	2	2021-05-14	2021-11-20	9	3	2	14
Polyandry with choice	2	2	2021-05-14	2021-11-21	6	2	0	8
Polyandry with choice	2	1	2021-05-14	2021-11-23	3	4	0	7
Polyandry with choice	2	2	2021-05-14	2021-11-24	5	4	0	9
Polyandry with choice	2	1	2021-05-14	2021-11-25	4	0	0	4
Polyandry with choice	2	2	2021-05-14	2021-12-01	0	3	1	4
Polyandry with choice	2	1	2021-05-14	2021-12-02	0	1	0	1
Polyandry with choice	2	2	2021-05-14	2021-12-03	0	2	1	3
Polyandry with choice	2	2	2021-05-14	2021-12-05	1	2	1	4
Polyandry with choice	2	1	2021-05-14	2021-12-07	0			0
Polyandry with choice	2	1	2021-05-14	2021-12-08	1			1
Polyandry with choice	2	3	2021-05-14	2021-12-10	9			9
Polyandry with choice	3	5	2021-05-17	2021-05-17	5	0	12	17
Polyandry with choice	3	2	2021-05-17	2021-05-18	1	10	0	11
Polyandry with choice	3	1	2021-05-17	2021-05-19	1	2	3	6
Polyandry with choice	3	4	2021-05-17	2021-05-21	8	9	4	21
Polyandry with choice	3	1	2021-05-17	2021-05-22	2	1	3	6
Polyandry with choice	3	1	2021-05-17	2021-05-23	2	2	0	4
Polyandry with choice	3	1	2021-05-17	2021-05-24	0	0	5	5
Polyandry with choice	3	2	2021-05-17	2021-05-25	15	0	0	15
Polyandry with choice	3	2	2021-05-17	2021-05-26	1	1	6	8
Polyandry with choice	3	2	2021-05-17	2021-05-27	0	2	10	12
Polyandry with choice	3	4	2021-05-17	2021-05-30	22	0	0	22
Polyandry with choice	3	1	2021-05-17	2021-05-31	6	0	0	6
Polyandry with choice	3	2	2021-05-17	2021-06-02	1	0	2	3
Polyandry with choice	3	1	2021-05-17	2021-06-05	0	0	2	2
Polyandry with choice	3	1	2021-05-17	2021-08-06	4	0	0	4
Polyandry with choice	3	1	2021-05-17	2021-08-07	4	1	0	5
Polyandry with choice	3	3	2021-05-17	2021-08-20	12	6	0	18
Polyandry with choice	3	1	2021-05-17	2021-08-21	5	0	0	5
Polyandry with choice	3	2	2021-05-17	2021-08-22	14	0	0	14
Polyandry with choice	4	2	2021-05-31	2021-05-31	5	3	2	10
Polyandry with choice	4	1	2021-05-31	2021-06-01	4	0	0	4
Polyandry with choice	4	1	2021-05-31	2021-06-02	4	0	2	6
Polyandry with choice	4	1	2021-05-31	2021-06-03	6	0	0	6
Polyandry with choice	4	1	2021-05-31	2021-06-04	3	0	0	3
Polyandry with choice	4	1	2021-05-31	2021-06-06	1	1	0	2
Polyandry with choice	4	2	2021-05-31	2021-06-08	9	0	0	9
Polyandry with choice	4	2	2021-05-31	2021-06-10	12	0	0	12
Polyandry with choice	4	1	2021-05-31	2021-06-11	4	3	0	7
Polyandry with choice	4	1	2021-05-31	2021-06-12	4	0	0	4
Polyandry with choice	4	2	2021-05-31	2021-06-14	11	1	0	12
Polyandry with choice	4	1	2021-05-31	2021-06-16	3	0	0	3
Polyandry with choice	4	2	2021-05-31	2021-06-17	3	0	0	3
Polyandry with choice	4	1	2021-05-31	2021-07-11	2	1	2	5
Polyandry with choice	4	2	2021-05-31	2021-07-12	9	0	0	9
Polyandry with choice	4	1	2021-05-31	2021-07-13	4	1	0	5
Polyandry with choice	4	2	2021-05-31	2021-07-14	7	1	2	10
Polyandry with choice	4	1	2021-05-31	2021-07-15	7	0	0	7
Polyandry with choice	4	1	2021-05-31	2021-07-16	6	0	0	6
Polyandry with choice	4	1	2021-05-31	2021-07-18	6	0	0	6
Polyandry with choice	4	1	2021-05-31	2021-07-22	4	1	0	5
Polyandry with choice	4	2	2021-05-31	2021-07-26	7	2	0	9
Polyandry with choice	4	2	2021-05-31	2021-08-01	5	5	1	11
Polyandry with choice	4	1	2021-05-31	2021-08-02	5	0	0	5
Polyandry with choice	4	1	2021-05-31	2021-08-04	6	2	0	8
Polyandry with choice	4	1	2021-05-31	2021-08-06	4	0	0	4
Polyandry with choice	4	1	2021-05-31	2021-08-07	6	0	0	6
Polyandry with choice	4	1	2021-05-31	2021-08-08	2	2	0	4
Polyandry with choice	4	1	2021-05-31	2021-08-09	4	1	0	5
Polyandry with choice	4	2	2021-05-31	2021-08-18	0	3	1	4
Polyandry with choice	4	1	2021-05-31	2021-08-19	4	0	0	4
Polyandry with choice	4	2	2021-05-31	2021-08-20	11	1	0	12
Polyandry with choice	4	1	2021-05-31	2021-08-22	4	1	0	5
Polyandry with choice	4	1	2021-05-31	2021-08-27	0	0	1	1
Polyandry with choice	4	1	2021-05-31	2021-08-31	1	3	2	6
Polyandry with choice	4	1	2021-05-31	2021-09-01	1	3	0	4
Polyandry with choice	4	2	2021-05-31	2021-09-04	6	1	0	7
Polyandry with choice	4	1	2021-05-31	2021-09-05	2	2	9	13
Polyandry with choice	4	1	2021-05-31	2021-09-16	0	0	3	3
Polyandry with choice	4	2	2021-05-31	2021-09-20	0	7	0	7
Polyandry with choice	4	1	2021-05-31	2021-09-25	2	0	0	2
Polyandry with choice	4	1	2021-05-31	2021-09-26	3	0	0	3
Polyandry with choice	4	2	2021-05-31	2021-09-27	9	0	0	9
Polyandry with choice	4	1	2021-05-31	2021-09-28	6	0	0	6
Polyandry with choice	4	1	2021-05-31	2021-10-01	2	1	2	5
Polyandry with choice	4	1	2021-05-31	2021-10-05	4	1	1	6
Polyandry with choice	4	1	2021-05-31	2021-10-09	7	0	1	8
Polyandry with choice	4	1	2021-05-31	2021-10-14	4	0	0	4
Polyandry with choice	4	2	2021-05-31	2021-10-28	2	0	0	2
Polyandry with choice	4	2	2021-05-31	2021-10-29	7	1	0	8
Polyandry with choice	4	3	2021-05-31	2021-11-01	8	7	1	16
Polyandry with choice	4	1	2021-05-31	2021-11-03	3	3	0	6
Polyandry with choice	4	1	2021-05-31	2021-11-04	4	2	0	6
Polyandry with choice	4	2	2021-05-31	2021-11-06	6	3	1	10
Polyandry with choice	4	1	2021-05-31	2021-11-07	7	0	0	7
Polyandry with choice	4	2	2021-05-31	2021-11-08	1	3	0	4
Polyandry with choice	4	2	2021-05-31	2021-11-10	6	2	1	9
Polyandry with choice	4	3	2021-05-31	2021-11-11	6	3	0	9
Polyandry with choice	4	2	2021-05-31	2021-11-12	7	0	0	7
Polyandry with choice	4	1	2021-05-31	2021-11-13	3	2	0	5
Polyandry with choice	4	2	2021-05-31	2021-11-14	7	2	0	9
Polyandry with choice	4	1	2021-05-31	2021-11-15	3	0	0	3
Polyandry with choice	4	3	2021-05-31	2021-11-17	16	3	0	19
Polyandry with choice	4	3	2021-05-31	2021-11-18	17	0	0	17
Polyandry with choice	4	2	2021-05-31	2021-11-20	6	5	1	12
Polyandry with choice	4	1	2021-05-31	2021-11-21	8	0	0	8
Polyandry with choice	4	1	2021-05-31	2021-11-22	5	0	0	5
Polyandry with choice	4	1	2021-05-31	2021-11-23	3	1	0	4
Polyandry with choice	4	2	2021-05-31	2021-11-24	6	4	0	10
Polyandry with choice	4	2	2021-05-31	2021-11-25	6	1	0	7
Polyandry with choice	4	3	2021-05-31	2021-11-26	12	1	1	14
Polyandry with choice	4	1	2021-05-31	2021-11-27	5	4	0	9
Polyandry with choice	4	2	2021-05-31	2021-11-28	8	2	0	10
Polyandry with choice	4	2	2021-05-31	2021-11-30	8	5	0	13
Polyandry with choice	4	1	2021-05-31	2021-12-01	6	0	0	6
Polyandry with choice	4	2	2021-05-31	2021-12-02	10	0	0	10
Polyandry with choice	4	3	2021-05-31	2021-12-03	14	0	0	14
Polyandry with choice	4	1	2021-05-31	2021-12-04	3	0	0	3
Polyandry with choice	4	1	2021-05-31	2021-12-05	1	1	2	4
Polyandry with choice	4	1	2021-05-31	2021-12-09	2			2
Polyandry with choice	5	1	2021-06-04	2021-06-04	4	2	0	6
Polyandry with choice	5	3	2021-06-04	2021-06-05	18	0	1	19
Polyandry with choice	5	2	2021-06-04	2021-06-06	14	0	0	14
Polyandry with choice	5	2	2021-06-04	2021-06-07	11	3	1	15
Polyandry with choice	5	3	2021-06-04	2021-06-08	22	0	1	23
Polyandry with choice	5	2	2021-06-04	2021-06-09	0	6	0	6
Polyandry with choice	5	2	2021-06-04	2021-06-10	21	0	0	21
Polyandry with choice	5	2	2021-06-04	2021-06-11	15	1	0	16
Polyandry with choice	5	1	2021-06-04	2021-06-13	3	0	0	3
Polyandry with choice	5	1	2021-06-04	2021-08-15	0	0	2	2
Polyandry with choice	5	1	2021-06-04	2021-10-12	4	0	0	4
Polyandry with choice	5	1	2021-06-04	2021-10-17	7	0	0	7
Polyandry with choice	6	1	2021-06-05	2021-06-05	1	0	0	1
Polyandry with choice	6	4	2021-06-05	2021-06-07	15	9	0	24
Polyandry with choice	6	2	2021-06-05	2021-06-08	20	0	1	21
Polyandry with choice	6	1	2021-06-05	2021-06-10	7	2	0	9
Polyandry with choice	6	2	2021-06-05	2021-08-10	6	1	2	9
Polyandry with choice	6	1	2021-06-05	2021-08-11	6	1	0	7
Polyandry with choice	6	1	2021-06-05	2021-08-13	5	1	1	7
Polyandry with choice	6	2	2021-06-05	2021-08-14	16	0	0	16
Polyandry with choice	6	1	2021-06-05	2021-08-16	7	0	0	7
Polyandry with choice	6	1	2021-06-05	2021-08-17	9	0	0	9
Polyandry with choice	6	1	2021-06-05	2021-08-18	5	0	0	5
Polyandry with choice	6	2	2021-06-05	2021-08-19	4	2	0	6
Polyandry with choice	6	1	2021-06-05	2021-08-20	6	1	0	7
Polyandry with choice	6	2	2021-06-05	2021-08-21	13	1	0	14
Polyandry with choice	6	2	2021-06-05	2021-08-22	13	0	1	14
Polyandry with choice	6	1	2021-06-05	2021-08-23	7	0	0	7
Polyandry with choice	6	2	2021-06-05	2021-08-24	8	4	1	13
Polyandry with choice	6	1	2021-06-05	2021-08-25	10	0	0	10
Polyandry with choice	6	1	2021-06-05	2021-08-26	7	1	0	8
Polyandry with choice	6	2	2021-06-05	2021-08-28	9	1	1	11
Polyandry with choice	6	1	2021-06-05	2021-08-29	2	0	0	2
Polyandry with choice	6	1	2021-06-05	2021-08-31	5	0	0	5
Polyandry with choice	6	1	2021-06-05	2021-09-20	3	0	3	6
Polyandry with choice	6	1	2021-06-05	2021-09-21	0	3	1	4
Polyandry with choice	6	1	2021-06-05	2021-09-24	3	1	0	4
Polyandry with choice	6	1	2021-06-05	2021-09-25	4	0	1	5
Polyandry with choice	6	1	2021-06-05	2021-09-26	9	0	0	9
Polyandry with choice	6	2	2021-06-05	2021-09-28	11	3	0	14
Polyandry with choice	6	1	2021-06-05	2021-09-30	0	2	0	2
Polyandry with choice	6	1	2021-06-05	2021-10-01	4	1	1	6
Polyandry with choice	6	2	2021-06-05	2021-10-02	13	0	0	13
Polyandry with choice	6	1	2021-06-05	2021-10-03	5	1	0	6
Polyandry with choice	6	1	2021-06-05	2021-11-15	0	1	2	3
Polyandry with choice	6	1	2021-06-05	2021-11-17	1	4	1	6
Polyandry with choice	6	2	2021-06-05	2021-11-18	13	2	0	15
Polyandry with choice	6	1	2021-06-05	2021-11-19	7	1	0	8
Polyandry with choice	6	3	2021-06-05	2021-11-21	22	3	0	25
Polyandry with choice	6	1	2021-06-05	2021-11-23	1	2	0	3
Polyandry with choice	7	1	2021-06-25	2021-06-25	3	0	1	4
Polyandry with choice	7	3	2021-06-25	2021-06-26	10	1	0	11
Polyandry with choice	7	3	2021-06-25	2021-06-27	10	1	1	12
Polyandry with choice	7	1	2021-06-25	2021-06-28	4	1	0	5
Polyandry with choice	7	1	2021-06-25	2021-07-02	2	3	0	5
Polyandry with choice	7	1	2021-06-25	2021-07-03	4	1	0	5
Polyandry with choice	7	1	2021-06-25	2021-07-04	3	1	1	5
Polyandry with choice	7	1	2021-06-25	2021-07-05	2	0	1	3
Polyandry with choice	7	1	2021-06-25	2021-07-06	8	0	0	8
Polyandry with choice	7	2	2021-06-25	2021-07-07	10	1	0	11
Polyandry with choice	7	2	2021-06-25	2021-08-11	9	3	2	14
Polyandry with choice	7	1	2021-06-25	2021-08-13	8	0	0	8
Polyandry with choice	7	1	2021-06-25	2021-08-14	8	0	0	8
Polyandry with choice	7	1	2021-06-25	2021-08-18	1	3	1	5
Polyandry with choice	7	1	2021-06-25	2021-08-20	3	1	1	5
Polyandry with choice	7	1	2021-06-25	2021-08-21	4	2	1	7
Polyandry with choice	7	2	2021-06-25	2021-08-22	12	2	0	14
Polyandry with choice	7	1	2021-06-25	2021-08-23	5	0	1	6
Polyandry with choice	7	1	2021-06-25	2021-08-24	8	0	0	8
Polyandry with choice	7	1	2021-06-25	2021-08-26	5	0	0	5
Polyandry with choice	7	1	2021-06-25	2021-09-03	0	0	3	3
Polyandry with choice	7	1	2021-06-25	2021-09-05	5	0	0	5
Polyandry with choice	7	1	2021-06-25	2021-09-08	3	0	0	3
Polyandry with choice	7	1	2021-06-25	2021-09-10	1	1	0	2
Polyandry with choice	7	2	2021-06-25	2021-09-11	11			11
Polyandry with choice	7	3	2021-06-25	2021-09-12	15	0	0	15
Polyandry with choice	7	1	2021-06-25	2021-09-13	5	0	0	5
Polyandry with choice	7	1	2021-06-25	2021-09-14	5	0	0	5
Polyandry with choice	7	1	2021-06-25	2021-09-15	5	1	0	6
Polyandry with choice	7	1	2021-06-25	2021-09-16	3	1	0	4
Polyandry with choice	7	1	2021-06-25	2021-09-17	5	0	1	6
Polyandry with choice	7	1	2021-06-25	2021-09-18	7	1	0	8
Polyandry with choice	7	2	2021-06-25	2021-09-19	13	1	0	14
Polyandry with choice	7	1	2021-06-25	2021-09-20	0	6	0	6
Polyandry with choice	7	1	2021-06-25	2021-09-21	5	0	0	5
Polyandry with choice	7	1	2021-06-25	2021-09-23	5	0	0	5
Polyandry with choice	7	1	2021-06-25	2021-09-24	1	1	0	2
Polyandry with choice	7	1	2021-06-25	2021-09-25	5	1	0	6
Polyandry with choice	7	1	2021-06-25	2021-09-26	6	0	1	7
Polyandry with choice	7	2	2021-06-25	2021-09-27	8	2	0	10
Polyandry with choice	7	1	2021-06-25	2021-09-28	6	0	0	6
Polyandry with choice	7	1	2021-06-25	2021-10-11	2	0	0	2
Polyandry with choice	7	1	2021-06-25	2021-10-12	11	1	1	13
Polyandry with choice	7	1	2021-06-25	2021-10-14	7	0	0	7
Polyandry with choice	7	1	2021-06-25	2021-10-16	5	0	0	5
Polyandry with choice	7	1	2021-06-25	2021-10-17	7	0	0	7
Polyandry with choice	7	1	2021-06-25	2021-10-28	1	0	0	1
Polyandry with choice	7	5	2021-06-25	2021-11-01	32	3	0	35
Polyandry with choice	7	2	2021-06-25	2021-11-02	11	4	1	16
Polyandry with choice	7	1	2021-06-25	2021-11-03	8	0	0	8
Polyandry with choice	7	2	2021-06-25	2021-11-04	14	0	2	16
Polyandry with choice	7	1	2021-06-25	2021-11-05	7	1	0	8
Polyandry with choice	7	5	2021-06-25	2021-11-06	19	0	1	20
Polyandry with choice	7	1	2021-06-25	2021-11-08	7	0	0	7
Polyandry with choice	7	1	2021-06-25	2021-11-10	3	0	1	4
Polyandry with choice	7	1	2021-06-25	2021-11-11	3	1	0	4
Polyandry with choice	7	3	2021-06-25	2021-11-12	4	2	0	6
Polyandry with choice	7	3	2021-06-25	2021-11-13	9	3	1	13
Polyandry with choice	7	2	2021-06-25	2021-11-14	7	2	1	10
Polyandry with choice	7	1	2021-06-25	2021-11-15	4	2	0	6
Polyandry with choice	7	1	2021-06-25	2021-11-16	2	2	0	4
Polyandry with choice	7	1	2021-06-25	2021-11-17	4	0	0	4
Polyandry with choice	7	2	2021-06-25	2021-11-18	8	3	0	11
Polyandry with choice	7	1	2021-06-25	2021-11-19	7	0	0	7
Polyandry with choice	7	3	2021-06-25	2021-11-20	16	1	0	17
Polyandry with choice	7	3	2021-06-25	2021-11-21	24	2	0	26
Polyandry with choice	7	2	2021-06-25	2021-11-23	12	0	0	12
Polyandry with choice	7	1	2021-06-25	2021-11-24	3	1	1	5
Polyandry with choice	7	2	2021-06-25	2021-11-25	6	0	0	6
Polyandry with choice	7	2	2021-06-25	2021-11-26	11	2	1	14
Polyandry with choice	7	3	2021-06-25	2021-11-28	18	4	0	22
Polyandry with choice	7	1	2021-06-25	2021-12-01	3	1	0	4
Polyandry with choice	8	1	2021-07-14	2021-07-14	0	0	2	2
Polyandry with choice	8	1	2021-07-14	2021-08-05	1	0	0	1
Polyandry with choice	8	1	2021-07-14	2021-08-06	5	1	0	6
Polyandry with choice	8	2	2021-07-14	2021-08-07	13	1	0	14
Polyandry with choice	8	1	2021-07-14	2021-08-08	9	4	0	13
Polyandry with choice	8	1	2021-07-14	2021-08-09	13	2	0	15
Polyandry with choice	8	1	2021-07-14	2021-08-11	0	1	1	2
Polyandry with choice	8	1	2021-07-14	2021-08-22	0	2	0	2
Polyandry with choice	8	1	2021-07-14	2021-08-23	4	2	0	6
Polyandry with choice	8	1	2021-07-14	2021-09-29	9	0	0	9
Polyandry with choice	8	1	2021-07-14	2021-09-30	7	0	0	7
Polyandry with choice	9	1	2021-08-08	2021-08-08	1	0	0	1
Polyandry with choice	9	2	2021-08-08	2021-08-09	5	1	2	8
Polyandry with choice	9	2	2021-08-08	2021-08-10	6	0	0	6
Polyandry with choice	9	2	2021-08-08	2021-08-11	8	0	0	8
Polyandry with choice	9	1	2021-08-08	2021-08-13	4	0	1	5
Polyandry with choice	9	1	2021-08-08	2021-08-14	3	0	0	3
Polyandry with choice	9	1	2021-08-08	2021-08-15	2	2	2	6
Polyandry with choice	9	1	2021-08-08	2021-08-17	3	0	0	3
Polyandry with choice	9	1	2021-08-08	2021-09-03	3	0	1	4
Polyandry with choice	9	3	2021-08-08	2021-09-04	7	2	1	10
Polyandry with choice	9	1	2021-08-08	2021-09-05	2	0	0	2
Polyandry with choice	9	1	2021-08-08	2021-09-07	3	1	0	4
Polyandry with choice	9	1	2021-08-08	2021-09-29	2	1	0	3
Polyandry with choice	9	1	2021-08-08	2021-10-10	4	0	0	4
Polyandry with choice	9	2	2021-08-08	2021-10-29	13	2	0	15
Polyandry with choice	9	1	2021-08-08	2021-10-30	2	0	0	2
Polyandry with choice	9	7	2021-08-08	2021-11-04	6	4	0	10
Polyandry with choice	9	2	2021-08-08	2021-11-05	5	2	0	7
Polyandry with choice	9	2	2021-08-08	2021-11-06	5	1	0	6
Polyandry with choice	9	2	2021-08-08	2021-11-07	3	2	0	5
Polyandry with choice	9	3	2021-08-08	2021-11-08	6	3	1	10
Polyandry with choice	9	1	2021-08-08	2021-11-10	1	2	0	3
Polyandry with choice	9	1	2021-08-08	2021-11-11	0	4	0	4
Polyandry with choice	9	2	2021-08-08	2021-11-12	4	2	0	6
Polyandry with choice	9	3	2021-08-08	2021-11-14	7	3	0	10
Polyandry with choice	9	1	2021-08-08	2021-11-15	1	2	0	3
Polyandry with choice	9	1	2021-08-08	2021-11-16	2	1	0	3
Polyandry with choice	9	1	2021-08-08	2021-11-18	0	2	1	3
Polyandry with choice	9	1	2021-08-08	2021-11-19	2	1	0	3

## Sheet: Progeny data
Treatment	Repet	hatching day	2_instar_molt	3_instar_molt	4_instar_molt	pre_pupa_molt	mass (g)	Death date
Monogamy	1	2021-09-25	2021-09-29	2021-10-04	2021-10-09	2021-10-15	0.0943
Monogamy	2	2021-09-21	2021-09-27	0	0	0	0	2021-10-02
Monogamy	3	2021-09-17	2021-09-23	2021-09-28	2021-10-03	2021-10-08	0.143
Monogamy	4	2021-09-19	2021-09-24	2021-09-28	2021-10-02	2021-10-07	0.138
Monogamy	5	2021-10-03	0	0	0	0	0	2021-10-12
Monogamy	6	2021-10-28	2021-11-01	2021-11-08	0	0	0	2021-11-09
Monogamy	7	2021-10-06	0	0	0	0	0	2021-10-12
Monogamy	8	2021-09-21	0	0	0	0	0	2021-09-30
Monogamy	9	2021-10-04	2021-10-07	2021-10-12	2021-10-17	2021-10-21	0.1574
Monogamy	10	2021-09-19	2021-10-01	2021-10-07	2021-10-10	2021-10-12	0.112
Monogamy	11	2021-08-08	2021-08-17	0	0	0	0	2021-08-21
Monogamy	12	2021-08-08	2021-08-12	2021-08-16	2021-08-20	2021-08-24	0.114
Monogamy	13	2021-08-09	2021-08-15	2021-08-20	2021-08-25	2021-09-02	0.138
Monogamy	14	2021-08-09	2021-08-15	2021-08-19	2021-08-24	2021-08-29	0.102
Monogamy	15	2021-12-05	2021-12-11	2021-12-18			0.134
Monogamy	16	2021-08-10	2021-08-17	0	0	0	0	2021-08-21
Monogamy	17	2021-08-09	2021-08-14	2021-08-18	2021-08-22	2021-08-31	0.11
Monogamy	18	2021-08-09	2021-08-15	2021-08-19	2021-08-22	2021-08-27	0.014
Monogamy	19	2021-08-11	2021-08-16	2021-08-21	2021-09-04	0	0	2021-09-06
Monogamy	20	2021-08-12	2021-08-17	0	0	0	0	2021-08-19
Monogamy	21	2021-08-03	2021-08-09	2021-08-14	2021-08-18	2021-08-22	0.15
Monogamy	22	2021-08-03	2021-08-08	2021-08-11	2021-08-16	2021-08-21	0.134
Monogamy	23	2021-08-03	2021-08-08	0	0	0	0	2021-08-09
Monogamy	24	2021-08-03	2021-08-08	2021-08-13	2021-08-16	2021-08-21	0.147
Monogamy	25	2021-08-03	2021-08-07	2021-08-12	2021-08-16	2021-08-21	0.1
Monogamy	26	2021-08-04	2021-08-09	2021-08-13	2021-08-19	2021-08-27	0.076
Monogamy	27	2021-08-04	2021-08-09	2021-08-13	2021-08-18	2021-08-23	0.119
Monogamy	28	2021-08-04	2021-08-08	2021-08-13	2021-08-16	2021-08-21	0.103
Monogamy	29	2021-08-05	9/8?	2021-08-15	2021-08-21	2021-08-29	0.075
Monogamy	30	2021-08-04	2021-08-08	2021-08-11	0	0	0	2021-08-16
Monogamy	31	2021-08-08	2021-08-13	2021-08-17	0	0	0	2021-08-22
Monogamy	32	2021-08-07	2021-08-12	2021-08-22	2021-08-24	2021-08-27	0.145
Monogamy	33	2021-08-07	0	0	0	0	0	2021-08-12
Monogamy	34	2021-08-08	0	0	0	0	0	2021-08-15
Monogamy	35	2021-07-29	2021-08-02	2021-08-08	2021-08-12	2021-08-17	0.102
Monogamy	36	2021-07-28	2021-08-02	0	0	0	0	2021-08-07
Monogamy	37	2021-07-29	2021-08-04	2021-08-09	morte acidental			2021-08-10
Monogamy	38	2021-07-30	2021-08-03	2021-08-07	2021-08-11	2021-08-15	0.127
Monogamy	39	2021-07-30	2021-08-03	2021-08-07	2021-08-11	2021-08-17	0.139
Monogamy	40	2021-07-29	2021-08-04	2021-08-09	2021-08-15	2021-08-19	0.104
Monogamy	41	2021-07-29	2021-08-06	2021-08-12	2021-08-15	2021-08-19	0.104
Monogamy	42	2021-07-29	2021-08-03	2021-08-07	2021-08-11	2021-08-15	0.139
Monogamy	43	2021-07-29	2021-08-02	2021-08-07	2021-08-10	2021-08-15	0.133
Monogamy	44	2021-07-29	2021-08-05	2021-08-08	2021-08-13	2021-08-18	0.104
Monogamy	45	2021-08-08	2021-08-12	2021-08-16	2021-08-20	2021-08-28	0.074
Monogamy	46	2021-08-08	2021-08-12	2021-08-17	2021-08-21	2021-08-26	0.08
Monogamy	47	2021-08-08	2021-08-11	2021-08-16	2021-08-25	2021-08-29	0.102
Monogamy	48	2021-08-08	2021-08-16	0	0	0	0	2021-08-19
Monogamy	49	2021-08-08	2021-08-14	2021-08-18	2021-08-22	2021-08-28	0.1
Monogamy	50	2021-08-09	2021-08-14	2021-08-18	2021-08-24	2021-08-27	0.087
Monogamy	51	2021-08-09	2021-08-14	2021-08-22	2021-08-25	2021-08-27	0.018
Monogamy	52	2021-08-21	2021-08-28	2021-09-01	2021-09-06	2021-09-11	0.11
Monogamy	53	2021-08-21	0	0	0	0	0	2021-08-28
Monogamy	54	2021-08-24	0	0	0	0	0	2021-08-28
Polyandry without choice	1	2021-07-20	2021-07-27	2021-07-29	2021-08-04	2021-08-08	0.129
Polyandry without choice	2	2021-07-17	2021-07-21	2021-07-25	2021-07-29	2021-08-03	0.118
Polyandry without choice	3	2021-07-17	2021-07-23	2021-07-26	2021-07-29	2021-08-06	0.106
Polyandry without choice	4	2021-07-18	2021-07-26	2021-07-29	2021-08-03	2021-08-11	0.089
Polyandry without choice	5	2021-07-17	0	0	0	0	0	2021-07-22
Polyandry without choice	6	2021-07-18	2021-07-22	2021-07-26	2021-07-31	2021-08-05	0.125
Polyandry without choice	7	2021-07-19	2021-07-24	2021-07-28	2021-08-01	2021-08-06	0.164
Polyandry without choice	8	2021-07-19	2021-07-23	2021-07-27	0	0	0	2021-07-29
Polyandry without choice	9	2021-07-20	2021-07-26	2021-07-31	2021-08-03	2021-08-08	0.143
Polyandry without choice	10	2021-07-20	2021-07-27	2021-07-29	2021-08-03	2021-08-11	0.126
Polyandry without choice	11	2021-08-02	2021-08-07	2021-08-12	2021-08-19	0	0	2021-08-20
Polyandry without choice	12	2021-08-02	2021-08-07	2021-08-12	2021-08-16	2021-08-20	0.111
Polyandry without choice	13	2021-08-04	0	0	0	0	0	2021-08-07
Polyandry without choice	14	2021-08-02	2021-08-05	2021-08-09	2021-08-13	2021-08-18	0.096
Polyandry without choice	15	2021-08-02	2021-08-07	2021-08-10	2021-08-15	2021-08-19	0.109
Polyandry without choice	16	2021-08-02	2021-08-07	2021-08-12	2021-08-16	2021-08-20	0.128
Polyandry without choice	17	2021-08-02	2021-08-08	2021-08-13	2021-08-18	2021-08-22	0.087
Polyandry without choice	18	2021-08-02	0	0	0	0	0	2021-08-08
Polyandry without choice	19	2021-08-02	2021-08-08	2021-08-15	2021-08-19	2021-08-23	0.127
Polyandry without choice	20	2021-08-14	0	0	0	0	0	2021-08-25
Polyandry without choice	21	2021-07-18	2021-07-24	2021-07-27	2021-08-01	2021-08-06	0.176
Polyandry without choice	22	2021-07-18	2021-07-24	2021-07-28	0	0	0	2021-07-30
Polyandry without choice	23	2021-07-18	2021-07-24	0	0	0	0	2021-07-28
Polyandry without choice	24	2021-07-18	0	0	0	0	0	2021-07-25
Polyandry without choice	25	2021-07-18	2021-07-24	2021-07-27	2021-08-01	2021-08-07	0.119
Polyandry without choice	26	2021-07-18	2021-07-24	2021-07-28	2021-08-02	2021-08-08	0.117
Polyandry without choice	27	2021-07-20	2021-07-24	2021-07-27	2021-08-01	2021-08-06	0.123
Polyandry without choice	28	2021-07-19	2021-07-23	2021-07-27	2021-08-01	2021-08-08	0.1
Polyandry without choice	29	2021-07-19	2021-07-24	2021-07-28	0	0	0	2021-08-01
Polyandry without choice	30	2021-07-20	2021-07-26	2021-07-28	2021-08-01	2021-08-08	0.108
Polyandry without choice	31	2021-10-19	2021-10-26	2021-10-28	2021-10-31	2021-11-04	0.119
Polyandry without choice	32	2021-10-19	2021-10-24	2021-10-27	2021-10-31	2021-11-04	0.172
Polyandry without choice	33	2021-10-20	2021-10-24	2021-10-27	2021-10-31	2021-11-04	0.133
Polyandry without choice	34	2021-10-20	2021-10-27	2021-10-31	2021-11-03	2021-11-08	0.122
Polyandry without choice	35	2021-08-14	2021-08-19	2021-08-24	2021-08-27	2021-09-01	0.144
Polyandry without choice	36	2021-08-19	0	0	0	0	0	2021-08-23
Polyandry without choice	37	2021-08-14	2021-08-20	2021-08-24	2021-09-01	2021-09-07	0.129
Polyandry without choice	38	2021-08-19	2021-08-24	0	0	0	0	2021-09-02
Polyandry without choice	39	2021-08-15	2021-08-28	0	0	0	0	2021-09-01
Polyandry without choice	40	2021-08-15	2021-08-19	2021-08-23	2021-08-29	2021-09-03	0.127
Polyandry without choice	41	2021-08-16	2021-08-19	morte acidental	0	0	0	2021-08-20
Polyandry without choice	42	2021-08-15	2021-08-19	0	0	0	0	2021-09-01
Polyandry without choice	43	2021-08-19	2021-08-28	0	0	0	0	2021-09-03
Polyandry without choice	44	2021-08-15	2021-08-20	2021-08-24	0	0	0	2021-08-26
Polyandry without choice	45	2021-08-02	2021-08-07	2021-08-10	2021-08-15	2021-08-21	0.095
Polyandry without choice	46	2021-08-01	2021-08-07	2021-08-12	2021-08-17	2021-08-22	0.131
Polyandry without choice	47	2021-08-03	0	0	0	0	0	2021-08-09
Polyandry without choice	48	2021-08-02	2021-08-08	2021-08-15	0	0	0	2021-08-25
Polyandry without choice	49	2021-08-02	2021-08-08	2021-08-11	0	0	0	2021-08-16
Polyandry without choice	50	2021-08-03	2021-08-08	2021-08-12	2021-08-20	2021-08-24	0.079
Polyandry without choice	51	2021-08-03	2021-08-08	2021-08-11	2021-08-15	2021-08-23	0.113
Polyandry without choice	52	2021-08-03	2021-08-07	2021-08-16	2021-08-19	2021-08-22	0.101
Polyandry without choice	53	2021-08-03	2021-08-09	2021-08-13	0	0	0	2021-08-15
Polyandry without choice	54	2021-08-04	0	0	0	0	0	2021-08-10
Polyandry without choice	55	2021-07-20	2021-07-25	2021-07-29	2021-08-02	2021-08-07	0.137
Polyandry without choice	56	2021-07-19	2021-07-25	2021-07-28	2021-08-01	2021-08-07	0.128
Polyandry without choice	57	2021-07-19	2021-07-24	2021-07-28	2021-08-02	2021-08-07	0.127
Polyandry without choice	58	2021-07-20	2021-07-27	0	0	0	0	2021-07-29
Polyandry without choice	59	2021-07-20	2021-07-29	2021-08-01	2021-08-06	2021-08-15	0.113
Polyandry without choice	60	2021-07-20	0	0	0	0	0	2021-07-26
Polyandry without choice	61	2021-07-20	2021-07-27	2021-08-01	2021-08-05	2021-08-09	0.115
Polyandry without choice	62	2021-07-20	2021-07-27	2021-07-30	2021-08-04	2021-08-09	0.114
Polyandry without choice	63	2021-07-20	0	0	0	0	0	2021-07-26
Polyandry without choice	64	2021-07-20	2021-07-27	2021-07-30	2021-08-04	2021-08-09	0.114
Polyandry with choice	1	2021-06-30	2021-07-06	0	0	0	0	2021-07-10
Polyandry with choice	2	2021-07-23	2021-07-29	2021-08-02	2021-08-07	2021-08-11	0.139
Polyandry with choice	3	2021-07-24	2021-07-28	2021-08-02	2021-08-07	2021-08-11	0.128
Polyandry with choice	4	2021-07-23	2021-07-28	2021-07-31	2021-08-06	2021-08-10	0.116
Polyandry with choice	5	2021-07-25	2021-08-03	2021-08-07	2021-08-12	2021-08-16	0.155
Polyandry with choice	6	2021-07-24	2021-07-30	2021-08-03	2021-08-08	2021-08-12	0.134
Polyandry with choice	7	2021-07-29	2021-08-06	2021-08-10	2021-08-16	0	0	2021-08-22
Polyandry with choice	8	2021-07-24	0	0	0	0	0	2021-07-25
Polyandry with choice	9	2021-07-29	2021-08-03	2021-08-07	2021-08-10	2021-08-15	0.102
Polyandry with choice	10	2021-07-30	2021-08-04	2021-08-08	2021-08-13	2021-08-18	0.099
Polyandry with choice	11	2021-05-22	2021-05-27	2021-05-31	2021-06-05	2021-06-09	0.133
Polyandry with choice	12	2021-05-22	2021-05-26	0	0	0	0	2021-05-29
Polyandry with choice	13	2021-05-23	2021-05-28	2021-06-02	2021-06-06	2021-06-10	0.153
Polyandry with choice	14	2021-05-23	2021-05-28	2021-06-07	morte acidental	0	0	2021-06-08
Polyandry with choice	15	2021-06-25	2021-06-30	2021-07-09	2021-07-14	2021-07-21
Polyandry with choice	16	2021-06-29	2021-07-06	2021-07-11	2021-07-15	2021-07-20	0.16
Polyandry with choice	17	2021-05-24	2021-05-31	2021-06-05	2021-06-08	2021-06-12	0.114
Polyandry with choice	18	2021-06-29	0	0	0	0	0	2021-07-04
Polyandry with choice	19	2021-07-01	0	0	0	0	0	2021-07-04
Polyandry with choice	20	2021-05-24	2021-05-29	0	0	0	0	2021-05-30
Polyandry with choice	21	2021-05-23	2021-05-28	2021-06-02	2021-06-06	2021-06-17	0.109
Polyandry with choice	22	2021-05-24	0	0	0	0	0	2021-05-28
Polyandry with choice	23	2021-05-31	2021-06-06	2021-06-09	2021-06-12	2021-06-17	0.133
Polyandry with choice	24	2021-05-24	2021-05-28	2021-05-31	2021-06-04	2021-06-08	0.125
Polyandry with choice	25	2021-05-26	2021-05-31	2021-06-07	2021-06-10	2021-06-13	0.143
Polyandry with choice	26	2021-05-29	0	0	0	0	0	2021-05-31
Polyandry with choice	27	2021-05-27	2021-06-01	2021-06-06	2021-05-11	2021-05-16	0.088
Polyandry with choice	28	2021-05-27	0	0	0	0	0	2021-06-02
Polyandry with choice	29	2021-06-01	0	0	0	0	0	2021-06-03
Polyandry with choice	30	2021-05-27	2021-05-31	2021-06-04	2021-06-08	2021-06-14	0.147
Polyandry with choice	31	2021-06-07	0	0	0	0	0	2021-06-12
Polyandry with choice	32	2021-06-08	2021-06-13	2021-06-19	2021-06-21	2021-06-26	0.089
Polyandry with choice	33	2021-06-09	2021-06-13	2021-06-17	2021-06-22	2021-06-26	0.116
Polyandry with choice	34	2021-06-09	2021-06-15	2021-06-19	2021-06-24	2021-06-27	0.112
Polyandry with choice	35	2021-06-09	2021-06-14	2021-06-19	2021-06-23	2021-06-26	0.139
Polyandry with choice	36	2021-06-10	2021-06-14	2021-06-19	0	0	0	2021-06-20
Polyandry with choice	37	2021-06-11	2021-06-16	2021-06-20	2021-06-26	2021-06-30	0.103
Polyandry with choice	38	2021-06-12	0	0	0	0	0	2021-06-16
Polyandry with choice	39	2021-06-18	2021-06-29	00:00:00	0	0	0	2021-07-03
Polyandry with choice	40	2021-06-17	2021-06-24	2021-06-28	2021-07-02	2021-07-08	0.073
Polyandry with choice	41	2021-06-11	2021-06-16	2021-06-20	2021-06-24	2021-06-28	0.135
Polyandry with choice	42	2021-06-11	2021-06-16	2021-06-20	2021-06-25	2021-06-30	0.126
Polyandry with choice	43	2021-06-15	2021-06-19	2021-06-24	2021-06-28	2021-07-04	0.081
Polyandry with choice	44	2021-06-12	2021-06-19	2021-06-22	2021-06-26	2021-06-30	0.112
Polyandry with choice	45	2021-06-12	0	0	0	0	0	2021-06-18
Polyandry with choice	46	2021-06-16	0	0	0	0	0	2021-06-22
Polyandry with choice	47	2021-06-15	0	0	0	0	0	2021-06-19
Polyandry with choice	48	2021-06-12	2021-06-18	2021-06-21	2021-06-26	2021-06-30	0.084
Polyandry with choice	49	2021-06-15	2021-06-22	0	0	0	0	2021-06-24
Polyandry with choice	50	2021-06-12	2021-06-19	2021-06-23	2021-06-26	2021-06-30	0.099
Polyandry with choice	51	2021-06-14	2021-06-20	2021-06-24	2021-06-28	2021-07-04	0.125
Polyandry with choice	52	2021-06-14	2021-06-19	2021-06-25	2021-06-29	2021-07-05	0.104
Polyandry with choice	53	2021-06-14	2021-06-23	2021-06-25	2021-06-29	2021-07-04	0.133
Polyandry with choice	54	2021-06-15	2021-06-20	2021-06-24	2021-06-28	2021-07-04	0.093
Polyandry with choice	55	2021-06-14	00:00:00	0	0	0	0	2021-06-20
Polyandry with choice	56	2021-06-17	2021-06-22	0	0	0	0	2021-06-25
Polyandry with choice	57	2021-06-15	2021-06-20	2021-06-26	2021-06-30	2021-07-05	0.106
Polyandry with choice	58	2021-06-15	00:00:00	0	0	0	0	2021-06-18
Polyandry with choice	59	2021-06-15	2021-06-19	2021-06-24	2021-06-27	2021-07-03	0.11
Polyandry with choice	60	2021-06-15	2021-06-20	2021-06-24	2021-06-28	2021-07-05	0.103
Polyandry with choice	61	2021-11-06	2021-11-13	2021-11-20	0	0	0	2021-11-23
Polyandry with choice	62	2021-11-07	2021-11-14	2021-11-17	2021-11-20	2021-11-24	0.125
Polyandry with choice	63	2021-11-06	2021-11-13	2021-11-16	2021-11-20	2021-11-25	0.163
Polyandry with choice	64	2021-11-06	2021-11-13	2021-11-16	2021-11-22	2021-11-26	0.165
Polyandry with choice	65	2021-11-06	2021-11-15	2021-11-18	2021-11-21	2021-11-25	0.131
Polyandry with choice	66	2021-11-06	2021-11-11	2021-11-15	2021-11-19	2021-11-24	0.097
Polyandry with choice	67	2021-11-06	2021-11-10	2021-11-15	2021-11-19	2021-11-23	0.942
Polyandry with choice	68	2021-11-07	2021-11-13	2021-11-16	2021-11-22	2021-11-28	0.063
Polyandry with choice	69	2021-11-07	2021-11-14	2021-11-20
Polyandry with choice	70	2021-11-07	2021-11-26	2021-11-03	0	0	0	2021-12-16
Polyandry with choice	71	2021-10-08	0	0	0	0	0	2021-10-10
Polyandry with choice	72	2021-08-13	2021-08-27	2021-08-31	2021-09-03	2021-09-07	0.109
Polyandry with choice	73	2021-10-08	2021-10-12	2021-10-15	2021-10-19	2021-10-24	0.057
Polyandry with choice	74	2021-08-13	2021-08-18	2021-08-22	2021-08-27	2021-09-04	0.073	2021-08-25
Polyandry with choice	75	2021-08-14	2021-08-21	0	0	0	0	2021-08-26
Polyandry with choice	76	2021-08-14	2021-08-19	0	0	0	0	2021-08-26
Polyandry with choice	77	2021-10-07	2021-10-19	2021-10-25	2021-10-31	2021-11-07	0	2021-11-09
Polyandry with choice	78	2021-08-14	2021-08-22	2021-08-28	2021-09-01	2021-09-06	0.121
Polyandry with choice	79	2021-08-14	2021-08-24	2021-08-29	2021-09-04	2021-09-11	0.089
Polyandry with choice	80	2021-08-14	2021-08-19	2021-08-23	2021-08-29	0	0	2021-09-03
Polyandry with choice	81	2021-08-19	0	0	0	0	0	2021-08-23
Polyandry with choice	82	2021-08-19	0	0	0	0	0	2021-08-24
Polyandry with choice	83	2021-11-17	0	0	0	0	0	2021-11-21
Polyandry with choice	84	2021-08-18	2021-08-23	2021-08-28	2021-09-01	2021-09-13	0.114
Polyandry with choice	85	2021-11-11	2021-11-14	2021-11-18	2021-11-21	2021-11-25	0.137
Polyandry with choice	86	2021-08-22	0	0	0	0	0	2021-08-27
Polyandry with choice	87	2021-11-04	2021-11-08	2021-11-13	2021-11-19	2021-11-21	0.127
Polyandry with choice	88	2021-11-04	2021-11-08	2021-11-11	2021-11-15	2021-11-18	0.197
Polyandry with choice	89	2021-08-19	0	0	0	0	0	2021-08-24
Polyandry with choice	90	2021-11-05	2021-11-10	2021-11-15	2021-11-19	2021-11-24	0.108
