# Supplementary material for: Polyandry contributes to Gonipterus platensis (Coleoptera: Curculionidae) rearing
Source: PeerJ. 2024 Aug 22;12:e17929. doi: 10.7717/peerj.17929 (PMC11344996; doi:10.7717/peerj.17929)
Supplement: Supplemental Information 4 [file peerj-12-17929-s004.xlsx]

## Sheet: Egg laying period
Treatment	Repetition	Number egg capsules	Date	Date first mate	Hatched larvae	Retained larvae	Infertile eggs	Eggs Total
H1	1	2	2021-02-05	2021-02-02	4	2	1	7
H1	1	1	2021-02-06	2021-02-02	2	2	0	4
H1	1	2	2021-02-07	2021-02-02	7	5	0	12
H1	1	0	2021-02-08	2021-02-02	0	0	0	0
H1	1	2	2021-02-09	2021-02-02	15	1	0	16
H1	1	2	2021-02-10	2021-02-02	17	0	0	17
H1	1	2	2021-02-11	2021-02-02	12	0	1	13
H1	1	1	2021-02-12	2021-02-02	7	0	0	7
H1	1	0	2021-02-13	2021-02-02	0	0	0	0
H1	1	2	2021-02-14	2021-02-02	12	0	0	12
H1	1	0	2021-02-15	2021-02-02	0	0	0	0
H1	1	2	2021-02-16	2021-02-02	15	0	0	15
H1	1	0	2021-02-17	2021-02-02	0	0	0	0
H1	1	1	2021-02-18	2021-02-02	7	0	0	7
H1	1	1	2021-02-19	2021-02-02	5	0	0	5
H1	1	0	2021-02-20	2021-02-02	0	0	0	0
H1	1	1	2021-02-21	2021-02-02	2	2	0	4
H1	1	0	2021-02-22	2021-02-02	0	0	0	0
H1	1	0	2021-02-23	2021-02-02	0	0	0	0
H1	1	1	2021-02-24	2021-02-02	6	0	0	6
H1	1	1	2021-02-25	2021-02-02	4	0	2	6
H1	1	2	2021-02-26	2021-02-02	11	1	2	14
H1	1	2	2021-02-27	2021-02-02	13	0	0	13
H1	1	1	2021-02-28	2021-02-02	4	0	1	5
H1	1	0	2021-03-01	2021-02-02	0	0	0	0
H1	1	1	2021-03-02	2021-02-02	6	0	0	6
H1	1	0	2021-03-03	2021-02-02	0	0	0	0
H1	1	1	2021-03-04	2021-02-02	1	0	6	7
H1	1	0	2021-03-05	2021-02-02	0	0	0	0
H1	1	1	2021-03-06	2021-02-02	4	0	0	4
H1	1	0	2021-03-07	2021-02-02	0	0	0	0
H1	1	1	2021-03-08	2021-02-02	4	0	1	5
H1	1	2	2021-03-09	2021-02-02	5	2	5	12
H1	1	1	2021-03-10	2021-02-02	3	0	2	5
H1	1	1	2021-03-11	2021-02-02	0	1	4	5
H1	1	1	2021-03-12	2021-02-02	2	1	4	7
H1	1	0	2021-03-13	2021-02-02	0	0	0	0
H1	1	2	2021-03-14	2021-02-02	5	2	6	13
H1	1	0	2021-03-15	2021-02-02	0	0	0	0
H1	1	0	2021-03-16	2021-02-02	0	0	0	0
H1	1	0	2021-03-17	2021-02-02	0	0	0	0
H1	1	0	2021-03-18	2021-02-02	0	0	0	0
H1	1	0	2021-03-19	2021-02-02	0	0	0	0
H1	1	0	2021-03-20	2021-02-02	0	0	0	0
H1	1	0	2021-03-21	2021-02-02	0	0	0	0
H1	1	0	2021-03-22	2021-02-02	0	0	0	0
H1	1	0	2021-03-23	2021-02-02	0	0	0	0
H1	1	0	2021-03-24	2021-02-02	0	0	0	0
H1	1	0	2021-03-25	2021-02-02	0	0	0	0
H1	1	0	2021-03-26	2021-02-02	0	0	0	0
H1	1	0	2021-03-27	2021-02-02	0	0	0	0
H1	1	0	2021-03-28	2021-02-02	0	0	0	0
H1	1	1	2021-03-29	2021-02-02	0	0	4	4
H1	1	1	2021-03-30	2021-02-02	0	0	4	4
H1	1	0	2021-03-31	2021-02-02	0	0	0	0
H1	1	0	2021-04-01	2021-02-02	0	0	0	0
H1	1	0	2021-04-02	2021-02-02	0	0	0	0
H1	1	0	2021-04-03	2021-02-02	0	0	0	0
H1	1	0	2021-04-04	2021-02-02	0	0	0	0
H1	1	1	2021-04-05	2021-02-02	3	0	4	7
H1	1	0	2021-04-06	2021-02-02	0	0	0	0
H1	1	1	2021-04-07	2021-02-02	0	0	5	5
H1	1	2	2021-04-08	2021-02-02	2	2	2	6
H1	1	1	2021-04-09	2021-02-02	0	0	5	5
H1	1	0	2021-04-10	2021-02-02	0	0	0	0
H1	1	0	2021-04-11	2021-02-02	0	0	0	0
H1	1	0	2021-04-12	2021-02-02	0	0	0	0
H1	1	0	2021-04-13	2021-02-02	0	0	0	0
H1	1	0	2021-04-14	2021-02-02	0	0	0	0
H1	1	0	2021-04-15	2021-02-02	0	0	0	0
H1	1	0	2021-04-16	2021-02-02	0	0	0	0
H1	1	0	2021-04-17	2021-02-02	0	0	0	0
H1	1	0	2021-04-18	2021-02-02	0	0	0	0
H1	1	0	2021-04-19	2021-02-02	0	0	0	0
H1	1	0	2021-04-20	2021-02-02	0	0	0	0
H1	1	0	2021-04-21	2021-02-02	0	0	0	0
H1	1	0	2021-04-22	2021-02-02	0	0	0	0
H1	1	0	2021-04-23	2021-02-02	0	0	0	0
H1	1	0	2021-04-24	2021-02-02	0	0	0	0
H1	1	0	2021-04-25	2021-02-02	0	0	0	0
H1	1	0	2021-04-26	2021-02-02	0	0	0	0
H1	1	0	2021-04-27	2021-02-02	0	0	0	0
H1	1	0	2021-04-28	2021-02-02	0	0	0	0
H1	1	0	2021-04-29	2021-02-02	0	0	0	0
H1	1	0	2021-04-30	2021-02-02	0	0	0	0
H1	1	0	2021-05-01	2021-02-02	0	0	0	0
H1	1	0	2021-05-02	2021-02-02	0	0	0	0
H1	1	0	2021-05-03	2021-02-02	0	0	0	0
H1	1	0	2021-05-04	2021-02-02	0	0	0	0
H1	1	0	2021-05-05	2021-02-02	0	0	0	0
H1	1	0	2021-05-06	2021-02-02	0	0	0	0
H1	1	0	2021-05-07	2021-02-02	0	0	0	0
H1	1	0	2021-05-08	2021-02-02	0	0	0	0
H1	1	0	2021-05-09	2021-02-02	0	0	0	0
H1	1	0	2021-05-10	2021-02-02	0	0	0	0
H1	1	0	2021-05-11	2021-02-02	0	0	0	0
H1	1	0	2021-05-12	2021-02-02	0	0	0	0
H1	1	0	2021-05-13	2021-02-02	0	0	0	0
H1	1	0	2021-05-14	2021-02-02	0	0	0	0
H1	1	0	2021-05-15	2021-02-02	0	0	0	0
H1	1	0	2021-05-16	2021-02-02	0	0	0	0
H1	1	1	2021-05-17	2021-02-02	0	0	4	4
H1	1	0	2021-05-18	2021-02-02	0	0	0	0
H1	1	0	2021-05-19	2021-02-02	0	0	0	0
H1	1	0	2021-05-20	2021-02-02	0	0	0	0
H1	1	0	2021-05-21	2021-02-02	0	0	0	0
H1	1	0	2021-05-22	2021-02-02	0	0	0	0
H1	1	0	2021-05-23	2021-02-02	0	0	0	0
H1	1	0	2021-05-24	2021-02-02	0	0	0	0
H1	1	0	2021-05-25	2021-02-02	0	0	0	0
H1	1	0	2021-05-26	2021-02-02	0	0	0	0
H1	1	0	2021-05-27	2021-02-02	0	0	0	0
H1	1	0	2021-05-28	2021-02-02	0	0	0	0
H1	1	0	2021-05-29	2021-02-02	0	0	0	0
H1	1	0	2021-05-30	2021-02-02	0	0	0	0
H1	1	0	2021-05-31	2021-02-02	0	0	0	0
H1	1	0	2021-06-01	2021-02-02	0	0	0	0
H1	1	0	2021-06-02	2021-02-02	0	0	0	0
H1	1	0	2021-06-03	2021-02-02	0	0	0	0
H1	1	0	2021-06-04	2021-02-02	0	0	0	0
H1	1	0	2021-06-05	2021-02-02	0	0	0	0
H1	1	0	2021-06-06	2021-02-02	0	0	0	0
H1	1	0	2021-06-07	2021-02-02	0	0	0	0
H1	1	0	2021-06-08	2021-02-02	0	0	0	0
H1	1	0	2021-06-09	2021-02-02	0	0	0	0
H1	1	0	2021-06-10	2021-02-02	0	0	0	0
H1	1	0	2021-06-11	2021-02-02	0	0	0	0
H1	1	0	2021-06-12	2021-02-02	0	0	0	0
H1	1	0	2021-06-13	2021-02-02	0	0	0	0
H1	1	0	2021-06-14	2021-02-02	0	0	0	0
H1	1	0	2021-06-15	2021-02-02	0	0	0	0
H1	1	0	2021-06-16	2021-02-02	0	0	0	0
H1	1	0	2021-06-17	2021-02-02	0	0	0	0
H1	1	0	2021-06-18	2021-02-02	0	0	0	0
H1	1	0	2021-06-19	2021-02-02	0	0	0	0
H1	1	0	2021-06-20	2021-02-02	0	0	0	0
H1	1	0	2021-06-21	2021-02-02	0	0	0	0
H1	1	0	2021-06-22	2021-02-02	0	0	0	0
H1	1	0	2021-06-23	2021-02-02	0	0	0	0
H1	1	0	2021-06-24	2021-02-02	0	0	0	0
H1	1	0	2021-06-25	2021-02-02	0	0	0	0
H1	1	0	2021-06-26	2021-02-02	0	0	0	0
H1	1	0	2021-06-27	2021-02-02	0	0	0	0
H1	1	0	2021-06-28	2021-02-02	0	0	0	0
H1	1	0	2021-06-29	2021-02-02	0	0	0	0
H1	1	0	2021-06-30	2021-02-02	0	0	0	0
H1	1	0	2021-07-01	2021-02-02	0	0	0	0
H1	1	0	2021-07-02	2021-02-02	0	0	0	0
H1	1	0	2021-07-03	2021-02-02	0	0	0	0
H1	1	0	2021-07-04	2021-02-02	0	0	0	0
H1	1	0	2021-07-05	2021-02-02	0	0	0	0
H1	1	0	2021-07-06	2021-02-02	0	0	0	0
H1	1	0	2021-07-07	2021-02-02	0	0	0	0
H1	1	0	2021-07-08	2021-02-02	0	0	0	0
H1	1	0	2021-07-09	2021-02-02	0	0	0	0
H1	1	0	2021-07-10	2021-02-02	0	0	0	0
H1	1	0	2021-07-11	2021-02-02	0	0	0	0
H1	1	0	2021-07-12	2021-02-02	0	0	0	0
H1	1	0	2021-07-13	2021-02-02	0	0	0	0
H1	1	0	2021-07-14	2021-02-02	0	0	0	0
H1	1	0	2021-07-15	2021-02-02	0	0	0	0
H1	1	0	2021-07-16	2021-02-02	0	0	0	0
H1	1	0	2021-07-17	2021-02-02	0	0	0	0
H1	1	0	2021-07-18	2021-02-02	0	0	0	0
H1	1	0	2021-07-19	2021-02-02	0	0	0	0
H1	1	0	2021-07-20	2021-02-02	0	0	0	0
H1	1	0	2021-07-21	2021-02-02	0	0	0	0
H1	1	0	2021-07-22	2021-02-02	0	0	0	0
H1	1	0	2021-07-23	2021-02-02	0	0	0	0
H1	1	0	2021-07-24	2021-02-02	0	0	0	0
H1	1	0	2021-07-25	2021-02-02	0	0	0	0
H1	1	0	2021-07-26	2021-02-02	0	0	0	0
H1	1	0	2021-07-27	2021-02-02	0	0	0	0
H1	1	0	2021-07-28	2021-02-02	0	0	0	0
H1	1	0	2021-07-29	2021-02-02	0	0	0	0
H1	1	0	2021-07-30	2021-02-02	0	0	0	0
H1	1	0	2021-07-31	2021-02-02	0	0	0	0
H1	1	0	2021-08-01	2021-02-02	0	0	0	0
H1	1	0	2021-08-02	2021-02-02	0	0	0	0
H1	1	0	2021-08-03	2021-02-02	0	0	0	0
H1	1	0	2021-08-04	2021-02-02	0	0	0	0
H1	1	0	2021-08-05	2021-02-02	0	0	0	0
H1	1	0	2021-08-06	2021-02-02	0	0	0	0
H1	1	0	2021-08-07	2021-02-02	0	0	0	0
H1	1	0	2021-08-08	2021-02-02	0	0	0	0
H1	1	0	2021-08-09	2021-02-02	0	0	0	0
H1	1	1	2021-08-10	2021-02-02	0	0	2	2
H1	1	2	2021-08-11	2021-02-02	0	0	7	7
H1	1	0	2021-08-12	2021-02-02	0	0	0	0
H1	1	1	2021-08-13	2021-02-02	0	0	3	3
H1	1	2	2021-08-14	2021-02-02	0	0	2	2
H1	1	0	2021-08-15	2021-02-02	0	0	0	0
H1	1	3	2021-08-16	2021-02-02	0	0	10	10
H1	1	0	2021-08-17	2021-02-02	0	0	0	0
H1	1	1	2021-08-18	2021-02-02	0	0	2	2
H1	1	0	2021-08-19	2021-02-02	0	0	0	0
H1	1	0	2021-08-20	2021-02-02	0	0	0	0
H1	1	0	2021-08-21	2021-02-02	0	0	0	0
H1	1	0	2021-08-22	2021-02-02	0	0	0	0
H1	1	1	2021-08-23	2021-02-02	0	0	3	3
H1	1	0	2021-08-24	2021-02-02	0	0	0	0
H1	1	0	2021-08-25	2021-02-02	0	0	0	0
H1	1	0	2021-08-26	2021-02-02	0	0	0	0
H1	1	0	2021-08-27	2021-02-02	0	0	0	0
H1	1	0	2021-08-28	2021-02-02	0	0	0	0
H1	1	0	2021-08-29	2021-02-02	0	0	0	0
H1	1	0	2021-08-30	2021-02-02	0	0	0	0
H1	1	1	2021-08-31	2021-02-02	0	0	2	2
H1	1	1	2021-09-01	2021-02-02	0	0	3	3
H1	1	1	2021-09-02	2021-02-02	0	0	2	2
H1	1	1	2021-09-03	2021-02-02	0	0	5	5
H1	1	0	2021-09-04	2021-02-02	0	0	0	0
H1	1	0	2021-09-05	2021-02-02	0	0	0	0
H1	1	1	2021-09-06	2021-02-02	0	0	2	2
H1	1	1	2021-09-07	2021-02-02	0	0	4	4
H1	1	0	2021-09-08	2021-02-02	0	0	0	0
H1	1	0	2021-09-09	2021-02-02	0	0	0	0
H1	1	0	2021-09-10	2021-02-02	0	0	0	0
H1	1	0	2021-09-11	2021-02-02	0	0	0	0
H1	1	0	2021-09-12	2021-02-02	0	0	0	0
H1	1	0	2021-09-13	2021-02-02	0	0	0	0
H1	1	0	2021-09-14	2021-02-02	0	0	0	0
H1	1	0	2021-09-15	2021-02-02	0	0	0	0
H1	1	0	2021-09-16	2021-02-02	0	0	0	0
H1	1	0	2021-09-17	2021-02-02	0	0	0	0
H1	1	0	2021-09-18	2021-02-02	0	0	0	0
H1	1	1	2021-09-19	2021-02-02	0	0	2	2
H1	1	1	2021-09-20	2021-02-02	0	0	3	3
H1	1	2	2021-09-21	2021-02-02	0	0	7	7
H1	1	0	2021-09-22	2021-02-02	0	0	0	0
H1	1	0	2021-09-23	2021-02-02	0	0	0	0
H1	1	1	2021-09-24	2021-02-02	0	0	3	3
H1	1	0	2021-09-25	2021-02-02	0	0	0	0
H1	1	1	2021-09-26	2021-02-02	0	0	4	4
H1	1	0	2021-09-27	2021-02-02	0	0	0	0
H1	1	0	2021-09-28	2021-02-02	0	0	0	0
H1	1	0	2021-09-29	2021-02-02	0	0	0	0
H1	1	0	2021-09-30	2021-02-02	0	0	0	0
H1	1	0	2021-10-01	2021-02-02	0	0	0	0
H1	1	0	2021-10-02	2021-02-02	0	0	0	0
H1	1	0	2021-10-03	2021-02-02	0	0	0	0
H1	1	0	2021-10-04	2021-02-02	0	0	0	0
H1	1	0	2021-10-05	2021-02-02	0	0	0	0
H1	1	0	2021-10-06	2021-02-02	0	0	0	0
H1	1	0	2021-10-07	2021-02-02	0	0	0	0
H1	1	0	2021-10-08	2021-02-02	0	0	0	0
H1	1	0	2021-10-09	2021-02-02	0	0	0	0
H1	1	0	2021-10-10	2021-02-02	0	0	0	0
H1	1	0	2021-10-11	2021-02-02	0	0	0	0
H1	1	0	2021-10-12	2021-02-02	0	0	0	0
H1	1	0	2021-10-13	2021-02-02	0	0	0	0
H1	1	0	2021-10-14	2021-02-02	0	0	0	0
H1	1	0	2021-10-15	2021-02-02	0	0	0	0
H1	1	0	2021-10-16	2021-02-02	0	0	0	0
H1	1	0	2021-10-17	2021-02-02	0	0	0	0
H1	1	0	2021-10-18	2021-02-02	0	0	0	0
H1	1	0	2021-10-19	2021-02-02	0	0	0	0
H1	1	0	2021-10-20	2021-02-02	0	0	0	0
H1	1	0	2021-10-21	2021-02-02	0	0	0	0
H1	1	0	2021-10-22	2021-02-02	0	0	0	0
H1	1	0	2021-10-23	2021-02-02	0	0	0	0
H1	1	0	2021-10-24	2021-02-02	0	0	0	0
H1	1	0	2021-10-25	2021-02-02	0	0	0	0
H1	1	0	2021-10-26	2021-02-02	0	0	0	0
H1	1	0	2021-10-27	2021-02-02	0	0	0	0
H1	1	0	2021-10-28	2021-02-02	0	0	0	0
H1	1	0	2021-10-29	2021-02-02	0	0	0	0
H1	1	0	2021-10-30	2021-02-02	0	0	0	0
H1	1	0	2021-10-31	2021-02-02	0	0	0	0
H1	1	0	2021-11-01	2021-02-02	0	0	0	0
H1	1	0	2021-11-02	2021-02-02	0	0	0	0
H1	1	0	2021-11-03	2021-02-02	0	0	0	0
H1	1	0	2021-11-04	2021-02-02	0	0	0	0
H1	1	0	2021-11-05	2021-02-02	0	0	0	0
H1	1	0	2021-11-06	2021-02-02	0	0	0	0
H1	1	0	2021-11-07	2021-02-02	0	0	0	0
H1	1	0	2021-11-08	2021-02-02	0	0	0	0
H1	1	0	2021-11-09	2021-02-02	0	0	0	0
H1	1	0	2021-11-10	2021-02-02	0	0	0	0
H1	1	0	2021-11-11	2021-02-02	0	0	0	0
H1	1	0	2021-11-12	2021-02-02	0	0	0	0
H1	1	0	2021-11-13	2021-02-02	0	0	0	0
H1	1	0	2021-11-14	2021-02-02	0	0	0	0
H1	1	1	2021-11-15	2021-02-02	0	0	3	3
H1	1	0	2021-11-16	2021-02-02	0	0	0	0
H1	1	2	2021-11-17	2021-02-02	0	0	6	6
H1	1	2	2021-11-18	2021-02-02	0	0	7	7
H1	1	1	2021-11-19	2021-02-02	0	0	4	4
H1	1	2	2021-11-20	2021-02-02	0	0	4	4
H1	1	2	2021-11-21	2021-02-02	0	0	6	6
H1	1	0	2021-11-22	2021-02-02	0	0	0	0
H1	1	1	2021-11-23	2021-02-02	0	0	4	4
H1	1	1	2021-11-24	2021-02-02	0	0	5	5
H1	1	3	2021-11-25	2021-02-02	0	0	11	11
H1	1	1	2021-11-26	2021-02-02	0	0	4	4
H1	1	1	2021-11-27	2021-02-02	0	0	5	5
H1	1	0	2021-11-28	2021-02-02	0	0	0	0
H1	1	0	2021-11-29	2021-02-02	0	0	0	0
H1	1	0	2021-11-30	2021-02-02	0	0	0	0
H1	1	1	2021-12-01	2021-02-02	0	0	5	5
H1	1	1	2021-12-02	2021-02-02	0	0	4	4
H1	1	2	2021-12-03	2021-02-02	0	0	5	5
H1	1	0	2021-12-04	2021-02-02	0	0	0	0
H1	1	1	2021-12-05	2021-02-02	0	0	3	3
H1	2	1	2021-04-10	2021-03-08	3	0	0	3
H1	2	0	2021-04-11	2021-03-08	0	0	0	0
H1	2	1	2021-04-12	2021-03-08	5	2	0	7
H1	2	1	2021-04-13	2021-03-08	7	0	0	7
H1	2	2	2021-04-14	2021-03-08	6	0	0	6
H1	2	2	2021-04-15	2021-03-08	15	2	0	17
H1	2	2	2021-04-16	2021-03-08	13	0	0	13
H1	2	1	2021-04-17	2021-03-08	7	0	0	7
H1	2	1	2021-04-18	2021-03-08	6	1	0	7
H1	2	1	2021-04-19	2021-03-08	4	0	0	4
H1	2	1	2021-04-20	2021-03-08	3	0	1	4
H1	2	2	2021-04-21	2021-03-08	11	0	0	11
H1	2	2	2021-04-22	2021-03-08	9	1	0	10
H1	2	1	2021-04-23	2021-03-08	6	0	0	6
H1	2	1	2021-04-24	2021-03-08	7	0	0	7
H1	2	1	2021-04-25	2021-03-08	6	1	0	7
H1	2	2	2021-04-26	2021-03-08	17	1	0	18
H1	2	2	2021-04-27	2021-03-08	15	0	0	15
H1	2	2	2021-04-28	2021-03-08	13	1	1	15
H1	2	1	2021-04-29	2021-03-08	1	4	2	7
H1	2	2	2021-04-30	2021-03-08	15	0	1	16
H1	2	1	2021-05-01	2021-03-08	3	3	1	7
H1	2	1	2021-05-02	2021-03-08	5	0	1	6
H1	2	2	2021-05-03	2021-03-08	6	2	1	9
H1	2	0	2021-05-04	2021-03-08	0	0	0	0
H1	2	1	2021-05-05	2021-03-08	4	1	1	6
H1	2	0	2021-05-06	2021-03-08	0	0	0	0
H1	2	1	2021-05-07	2021-03-08	5	0	1	6
H1	2	0	2021-05-08	2021-03-08	0	0	0	0
H1	2	1	2021-05-09	2021-03-08	3	5	1	9
H1	2	1	2021-05-10	2021-03-08	7	0	0	7
H1	2	2	2021-05-11	2021-03-08	12	2	0	14
H1	2	0	2021-05-12	2021-03-08	0	0	0	0
H1	2	1	2021-05-13	2021-03-08	8	0	0	8
H1	2	2	2021-05-14	2021-03-08	12	0	0	12
H1	2	0	2021-05-15	2021-03-08	0	0	0	0
H1	2	0	2021-05-16	2021-03-08	0	0	0	0
H1	2	0	2021-05-17	2021-03-08	0	0	0	0
H1	2	0	2021-05-18	2021-03-08	0	0	0	0
H1	2	0	2021-05-19	2021-03-08	0	0	0	0
H1	2	0	2021-05-20	2021-03-08	0	0	0	0
H1	2	0	2021-05-21	2021-03-08	0	0	0	0
H1	2	0	2021-05-22	2021-03-08	0	0	0	0
H1	2	0	2021-05-23	2021-03-08	0	0	0	0
H1	2	0	2021-05-24	2021-03-08	0	0	0	0
H1	2	0	2021-05-25	2021-03-08	0	0	0	0
H1	2	0	2021-05-26	2021-03-08	0	0	0	0
H1	2	0	2021-05-27	2021-03-08	0	0	0	0
H1	2	0	2021-05-28	2021-03-08	0	0	0	0
H1	2	0	2021-05-29	2021-03-08	0	0	0	0
H1	2	0	2021-05-30	2021-03-08	0	0	0	0
H1	2	0	2021-05-31	2021-03-08	0	0	0	0
H1	2	0	2021-06-01	2021-03-08	0	0	0	0
H1	2	0	2021-06-02	2021-03-08	0	0	0	0
H1	2	0	2021-06-03	2021-03-08	0	0	0	0
H1	2	0	2021-06-04	2021-03-08	0	0	0	0
H1	2	0	2021-06-05	2021-03-08	0	0	0	0
H1	2	0	2021-06-06	2021-03-08	0	0	0	0
H1	2	0	2021-06-07	2021-03-08	0	0	0	0
H1	2	0	2021-06-08	2021-03-08	0	0	0	0
H1	2	0	2021-06-09	2021-03-08	0	0	0	0
H1	2	0	2021-06-10	2021-03-08	0	0	0	0
H1	2	0	2021-06-11	2021-03-08	0	0	0	0
H1	2	0	2021-06-12	2021-03-08	0	0	0	0
H1	2	1	2021-06-13	2021-03-08	2	0	4	6
H1	2	1	2021-06-14	2021-03-08	3	1	1	5
H1	2	0	2021-06-15	2021-03-08	0	0	0	0
H1	2	0	2021-06-16	2021-03-08	0	0	0	0
H1	2	0	2021-06-17	2021-03-08	0	0	0	0
H1	2	0	2021-06-18	2021-03-08	0	0	0	0
H1	2	0	2021-06-19	2021-03-08	0	0	0	0
H1	2	2	2021-06-20	2021-03-08	2	1	2	5
H1	2	0	2021-06-21	2021-03-08	0	0	0	0
H1	2	0	2021-06-22	2021-03-08	0	0	0	0
H1	2	0	2021-06-23	2021-03-08	0	0	0	0
H1	2	0	2021-06-24	2021-03-08	0	0	0	0
H1	2	0	2021-06-25	2021-03-08	0	0	0	0
H1	2	0	2021-06-26	2021-03-08	0	0	0	0
H1	2	0	2021-06-27	2021-03-08	0	0	0	0
H1	2	0	2021-06-28	2021-03-08	0	0	0	0
H1	2	0	2021-06-29	2021-03-08	0	0	0	0
H1	2	0	2021-06-30	2021-03-08	0	0	0	0
H1	2	0	2021-07-01	2021-03-08	0	0	0	0
H1	2	0	2021-07-02	2021-03-08	0	0	0	0
H1	2	0	2021-07-03	2021-03-08	0	0	0	0
H1	2	0	2021-07-04	2021-03-08	0	0	0	0
H1	2	0	2021-07-05	2021-03-08	0	0	0	0
H1	2	0	2021-07-06	2021-03-08	0	0	0	0
H1	2	0	2021-07-07	2021-03-08	0	0	0	0
H1	2	0	2021-07-08	2021-03-08	0	0	0	0
H1	2	0	2021-07-09	2021-03-08	0	0	0	0
H1	2	0	2021-07-10	2021-03-08	0	0	0	0
H1	2	0	2021-07-11	2021-03-08	0	0	0	0
H1	2	0	2021-07-12	2021-03-08	0	0	0	0
H1	2	0	2021-07-13	2021-03-08	0	0	0	0
H1	2	0	2021-07-14	2021-03-08	0	0	0	0
H1	2	0	2021-07-15	2021-03-08	0	0	0	0
H1	2	0	2021-07-16	2021-03-08	0	0	0	0
H1	2	0	2021-07-17	2021-03-08	0	0	0	0
H1	2	0	2021-07-18	2021-03-08	0	0	0	0
H1	2	0	2021-07-19	2021-03-08	0	0	0	0
H1	2	0	2021-07-20	2021-03-08	0	0	0	0
H1	2	0	2021-07-21	2021-03-08	0	0	0	0
H1	2	0	2021-07-22	2021-03-08	0	0	0	0
H1	2	0	2021-07-23	2021-03-08	0	0	0	0
H1	2	0	2021-07-24	2021-03-08	0	0	0	0
H1	2	0	2021-07-25	2021-03-08	0	0	0	0
H1	2	2	2021-07-26	2021-03-08	8	1	0	9
H1	2	0	2021-07-27	2021-03-08	0	0	0	0
H1	2	0	2021-07-28	2021-03-08	0	0	0	0
H1	2	0	2021-07-29	2021-03-08	0	0	0	0
H1	2	1	2021-07-29	2021-03-08	5	0	0	5
H1	2	0	2021-07-30	2021-03-08	0	0	0	0
H1	2	1	2021-07-31	2021-03-08	6	0	0	6
H1	2	0	2021-08-01	2021-03-08	0	0	0	0
H1	2	0	2021-08-02	2021-03-08	0	0	0	0
H1	2	0	2021-08-03	2021-03-08	0	0	0	0
H1	2	0	2021-08-04	2021-03-08	0	0	0	0
H1	2	0	2021-08-05	2021-03-08	0	0	0	0
H1	2	1	2021-08-06	2021-03-08	4	1	0	5
H1	2	1	2021-08-07	2021-03-08	4	1	0	5
H1	2	2	2021-08-08	2021-03-08	8	3	2	13
H1	2	0	2021-08-09	2021-03-08	0	0	0	0
H1	2	3	2021-08-10	2021-03-08	13	1	0	14
H1	2	1	2021-08-11	2021-03-08	6	0	0	6
H1	2	0	2021-08-12	2021-03-08	0	0	0	0
H1	2	1	2021-08-13	2021-03-08	0	3	2	5
H1	2	1	2021-08-14	2021-03-08	1	0	1	2
H1	2	1	2021-08-15	2021-03-08	4	0	2	6
H1	2	0	2021-08-16	2021-03-08	0	0	0	0
H1	2	0	2021-08-17	2021-03-08	0	0	0	0
H1	2	0	2021-08-18	2021-03-08	0	0	0	0
H1	2	0	2021-08-19	2021-03-08	0	0	0	0
H1	2	0	2021-08-20	2021-03-08	0	0	0	0
H1	2	0	2021-08-21	2021-03-08	0	0	0	0
H1	2	0	2021-08-22	2021-03-08	0	0	0	0
H1	2	0	2021-08-23	2021-03-08	0	0	0	0
H1	2	0	2021-08-24	2021-03-08	0	0	0	0
H1	2	0	2021-08-25	2021-03-08	0	0	0	0
H1	2	0	2021-08-26	2021-03-08	0	0	0	0
H1	2	0	2021-08-27	2021-03-08	0	0	0	0
H1	2	0	2021-08-28	2021-03-08	0	0	0	0
H1	2	0	2021-08-29	2021-03-08	0	0	0	0
H1	2	0	2021-08-30	2021-03-08	0	0	0	0
H1	2	0	2021-08-31	2021-03-08	0	0	0	0
H1	2	0	2021-09-01	2021-03-08	0	0	0	0
H1	2	0	2021-09-02	2021-03-08	0	0	0	0
H1	2	0	2021-09-03	2021-03-08	0	0	0	0
H1	2	0	2021-09-04	2021-03-08	0	0	0	0
H1	2	0	2021-09-05	2021-03-08	0	0	0	0
H1	2	0	2021-09-06	2021-03-08	0	0	0	0
H1	2	0	2021-09-07	2021-03-08	0	0	0	0
H1	2	0	2021-09-08	2021-03-08	0	0	0	0
H1	2	0	2021-09-09	2021-03-08	0	0	0	0
H1	2	0	2021-09-10	2021-03-08	0	0	0	0
H1	2	0	2021-09-11	2021-03-08	0	0	0	0
H1	2	0	2021-09-12	2021-03-08	0	0	0	0
H1	2	0	2021-09-13	2021-03-08	0	0	0	0
H1	2	0	2021-09-14	2021-03-08	0	0	0	0
H1	2	0	2021-09-15	2021-03-08	0	0	0	0
H1	2	0	2021-09-16	2021-03-08	0	0	0	0
H1	2	0	2021-09-17	2021-03-08	0	0	0	0
H1	2	0	2021-09-18	2021-03-08	0	0	0	0
H1	2	0	2021-09-19	2021-03-08	0	0	0	0
H1	2	0	2021-09-20	2021-03-08	0	0	0	0
H1	2	0	2021-09-21	2021-03-08	0	0	0	0
H1	2	0	2021-09-22	2021-03-08	0	0	0	0
H1	2	0	2021-09-23	2021-03-08	0	0	0	0
H1	2	0	2021-09-24	2021-03-08	0	0	0	0
H1	2	0	2021-09-25	2021-03-08	0	0	0	0
H1	2	0	2021-09-26	2021-03-08	0	0	0	0
H1	2	0	2021-09-27	2021-03-08	0	0	0	0
H1	2	0	2021-09-28	2021-03-08	0	0	0	0
H1	2	0	2021-09-29	2021-03-08	0	0	0	0
H1	2	1	2022-09-30	2021-03-08	1	0	0	1
H1	2	1	2021-10-01	2021-03-08	1	0	0	1
H1	2	1	2021-10-02	2021-03-08	4	1	0	5
H1	2	1	2021-10-03	2021-03-08	3	0	1	4
H1	2	0	2021-10-04	2021-03-08	0	0	0	0
H1	2	0	2021-10-05	2021-03-08	0	0	0	0
H1	2	1	2021-10-06	2021-03-08	3	0	0	3
H1	2	0	2021-10-07	2021-03-08	0	0	0	0
H1	2	0	2021-10-08	2021-03-08	0	0	0	0
H1	2	0	2021-10-09	2021-03-08	0	0	0	0
H1	2	0	2021-10-10	2021-03-08	0	0	0	0
H1	2	0	2021-10-11	2021-03-08	0	0	0	0
H1	2	0	2021-10-12	2021-03-08	0	0	0	0
H1	2	0	2021-10-13	2021-03-08	0	0	0	0
H1	2	0	2021-10-14	2021-03-08	0	0	0	0
H1	2	1	2021-11-15	2021-03-08	0	0	2	2
H1	2	0	2021-11-16	2021-03-08	0	0	0	0
H1	2	2	2021-11-17	2021-03-08	1	0	2	3
H1	2	0	2021-11-18	2021-03-08	0	0	0	0
H1	2	0	2021-11-19	2021-03-08	0	0	0	0
H1	2	0	2021-11-20	2021-03-08	0	0	0	0
H1	2	2	2021-11-20	2021-03-08	7	1	0	8
H1	2	2	2021-11-21	2021-03-08	7	0	0	7
H1	2	1	2021-11-22	2021-03-08	1	0	0	1
H1	2	3	2021-11-23	2021-03-08	7	2	0	9
H1	2	2	2021-11-24	2021-03-08	11	2	0	13
H1	2	2	2021-11-25	2021-03-08	3	1	0	4
H1	2	2	2021-11-26	2021-03-08	8	4	0	12
H1	2	0	2021-11-27	2021-03-08	0	0	0	0
H1	2	3	2021-11-28	2021-03-08	9	2	3	14
H1	2	0	2021-11-29	2021-03-08	0	0	0	0
H1	2	1	2021-11-30	2021-03-08	3	1	1	5
H1	2	2	2021-12-01	2021-03-08	9	1	0	10
H1	2	2	2021-12-02	2021-03-08	7	0	2	9
H1	2	0	2021-12-03	2021-03-08	0	0	0	0
H1	2	2	2021-12-04	2021-03-08	7	3	2	12
H1	2	1	2021-12-05	2021-03-08	4	1	0	5
H1	2	0	2021-12-06	2021-03-08	0	0	0	0
H1	2	1	2021-12-07	2021-03-08	5	0	0	5
H1	3	3	2021-05-16	2021-03-09	0	0	8	8
H1	3	2	2021-05-17	2021-03-09	0	0	4	4
H1	3	0	2021-05-18	2021-03-09	0	0	4	4
H1	3	0	2021-05-19	2021-03-09	0	0	0	0
H1	3	0	2021-05-20	2021-03-09	0	0	0	0
H1	3	0	2021-05-21	2021-03-09	0	0	0	0
H1	3	0	2021-05-22	2021-03-09	0	0	0	0
H1	3	0	2021-05-23	2021-03-09	0	0	0	0
H1	3	0	2021-05-24	2021-03-09	0	0	0	0
H1	3	0	2021-05-25	2021-03-09	0	0	0	0
H1	3	0	2021-05-26	2021-03-09	0	0	0	0
H1	3	0	2021-05-27	2021-03-09	0	0	0	0
H1	3	0	2021-05-28	2021-03-09	0	0	0	0
H1	3	0	2021-05-29	2021-03-09	0	0	0	0
H1	3	0	2021-05-30	2021-03-09	0	0	0	0
H1	3	0	2021-05-31	2021-03-09	0	0	0	0
H1	3	0	2021-06-01	2021-03-09	0	0	0	0
H1	3	0	2021-06-02	2021-03-09	0	0	0	0
H1	3	0	2021-06-03	2021-03-09	0	0	0	0
H1	3	0	2021-06-04	2021-03-09	0	0	0	0
H1	3	0	2021-06-05	2021-03-09	0	0	0	0
H1	3	0	2021-06-06	2021-03-09	0	0	0	0
H1	3	0	2021-06-07	2021-03-09	0	0	0	0
H1	3	0	2021-06-08	2021-03-09	0	0	0	0
H1	3	0	2021-06-09	2021-03-09	0	0	0	0
H1	3	0	2021-06-10	2021-03-09	0	0	0	0
H1	3	0	2021-06-11	2021-03-09	0	0	0	0
H1	3	0	2021-06-12	2021-03-09	0	0	0	0
H1	3	0	2021-06-13	2021-03-09	0	0	0	0
H1	3	0	2021-06-14	2021-03-09	0	0	0	0
H1	3	0	2021-06-15	2021-03-09	0	0	0	0
H1	3	0	2021-06-16	2021-03-09	0	0	0	0
H1	3	0	2021-06-17	2021-03-09	0	0	0	0
H1	3	0	2021-06-18	2021-03-09	0	0	0	0
H1	3	0	2021-06-19	2021-03-09	0	0	0	0
H1	3	0	2021-06-20	2021-03-09	0	0	0	0
H1	3	0	2021-06-21	2021-03-09	0	0	0	0
H1	3	0	2021-06-22	2021-03-09	0	0	0	0
H1	3	0	2021-06-23	2021-03-09	0	0	0	0
H1	3	0	2021-06-24	2021-03-09	0	0	0	0
H1	3	0	2021-06-25	2021-03-09	0	0	0	0
H1	3	0	2021-06-26	2021-03-09	0	0	0	0
H1	3	0	2021-06-27	2021-03-09	0	0	0	0
H1	3	0	2021-06-28	2021-03-09	0	0	0	0
H1	3	0	2021-06-29	2021-03-09	0	0	0	0
H1	3	0	2021-06-30	2021-03-09	0	0	0	0
H1	3	0	2021-07-01	2021-03-09	0	0	0	0
H1	3	0	2021-07-02	2021-03-09	0	0	0	0
H1	3	0	2021-07-03	2021-03-09	0	0	0	0
H1	3	0	2021-07-04	2021-03-09	0	0	0	0
H1	3	0	2021-07-05	2021-03-09	0	0	0	0
H1	3	0	2021-07-06	2021-03-09	0	0	0	0
H1	3	0	2021-07-07	2021-03-09	0	0	0	0
H1	3	0	2021-07-08	2021-03-09	0	0	0	0
H1	3	0	2021-07-09	2021-03-09	0	0	0	0
H1	3	0	2021-07-10	2021-03-09	0	0	0	0
H1	3	0	2021-07-11	2021-03-09	0	0	0	0
H1	3	0	2021-07-12	2021-03-09	0	0	0	0
H1	3	0	2021-07-13	2021-03-09	0	0	0	0
H1	3	0	2021-07-14	2021-03-09	0	0	0	0
H1	3	0	2021-07-15	2021-03-09	0	0	0	0
H1	3	0	2021-07-16	2021-03-09	0	0	0	0
H1	3	0	2021-07-17	2021-03-09	0	0	0	0
H1	3	0	2021-07-18	2021-03-09	0	0	0	0
H1	3	0	2021-07-19	2021-03-09	0	0	0	0
H1	3	0	2021-07-20	2021-03-09	0	0	0	0
H1	3	0	2021-07-21	2021-03-09	0	0	0	0
H1	3	0	2021-07-22	2021-03-09	0	0	0	0
H1	3	0	2021-07-23	2021-03-09	0	0	0	0
H1	3	0	2021-07-24	2021-03-09	0	0	0	0
H1	3	0	2021-07-25	2021-03-09	0	0	0	0
H1	3	0	2021-07-26	2021-03-09	0	0	0	0
H1	3	0	2021-07-27	2021-03-09	0	0	0	0
H1	3	0	2021-07-28	2021-03-09	0	0	0	0
H1	3	0	2021-07-29	2021-03-09	0	0	0	0
H1	3	0	2021-07-30	2021-03-09	0	0	0	0
H1	3	0	2021-07-31	2021-03-09	0	0	0	0
H1	3	0	2021-08-01	2021-03-09	0	0	0	0
H1	3	0	2021-08-02	2021-03-09	0	0	0	0
H1	3	0	2021-08-03	2021-03-09	0	0	0	0
H1	3	0	2021-08-04	2021-03-09	0	0	0	0
H1	3	0	2021-08-05	2021-03-09	0	0	0	0
H1	3	0	2021-08-06	2021-03-09	0	0	0	0
H1	3	0	2021-08-07	2021-03-09	0	0	0	0
H1	3	0	2021-08-08	2021-03-09	0	0	0	0
H1	3	0	2021-08-09	2021-03-09	0	0	0	0
H1	3	2	2021-08-10	2021-03-09	0	0	4	4
H1	3	1	2021-08-11	2021-03-09	0	0	2	2
H1	3	0	2021-08-12	2021-03-09	0	0	0	0
H1	3	0	2021-08-13	2021-03-09	0	0	0	0
H1	3	0	2021-08-14	2021-03-09	0	0	0	0
H1	3	0	2021-08-15	2021-03-09	0	0	0	0
H1	3	0	2021-08-16	2021-03-09	0	0	0	0
H1	3	0	2021-08-17	2021-03-09	0	0	0	0
H1	3	0	2021-08-18	2021-03-09	0	0	0	0
H1	3	0	2021-08-19	2021-03-09	0	0	0	0
H1	3	0	2021-08-20	2021-03-09	0	0	0	0
H1	3	0	2021-08-21	2021-03-09	0	0	0	0
H1	3	0	2021-08-22	2021-03-09	0	0	0	0
H1	3	0	2021-08-23	2021-03-09	0	0	0	0
H1	3	0	2021-08-24	2021-03-09	0	0	0	0
H1	3	0	2021-08-25	2021-03-09	0	0	0	0
H1	3	0	2021-08-26	2021-03-09	0	0	0	0
H1	3	0	2021-08-27	2021-03-09	0	0	0	0
H1	3	0	2021-08-28	2021-03-09	0	0	0	0
H1	3	0	2021-08-29	2021-03-09	0	0	0	0
H1	3	0	2021-08-30	2021-03-09	0	0	0	0
H1	3	0	2021-08-31	2021-03-09	0	0	0	0
H1	3	0	2021-09-01	2021-03-09	0	0	0	0
H1	3	0	2021-09-02	2021-03-09	0	0	0	0
H1	3	0	2021-09-03	2021-03-09	0	0	0	0
H1	3	0	2021-09-04	2021-03-09	0	0	0	0
H1	3	0	2021-09-05	2021-03-09	0	0	0	0
H1	3	0	2021-09-06	2021-03-09	0	0	0	0
H1	3	0	2021-09-07	2021-03-09	0	0	0	0
H1	3	0	2021-09-08	2021-03-09	0	0	0	0
H1	3	0	2021-09-09	2021-03-09	0	0	0	0
H1	3	0	2021-09-10	2021-03-09	0	0	0	0
H1	3	0	2021-09-11	2021-03-09	0	0	0	0
H1	3	0	2021-09-12	2021-03-09	0	0	0	0
H1	3	0	2021-09-13	2021-03-09	0	0	0	0
H1	3	0	2021-09-14	2021-03-09	0	0	0	0
H1	3	0	2021-09-15	2021-03-09	0	0	0	0
H1	3	0	2021-09-16	2021-03-09	0	0	0	0
H1	3	0	2021-09-17	2021-03-09	0	0	0	0
H1	3	0	2021-09-18	2021-03-09	0	0	0	0
H1	3	0	2021-09-19	2021-03-09	0	0	0	0
H1	3	1	2021-09-20	2021-03-09	0	0	1	1
H1	3	0	2021-09-21	2021-03-09	0	0	0	0
H1	3	0	2021-09-22	2021-03-09	0	0	0	0
H1	3	0	2021-09-23	2021-03-09	0	0	0	0
H1	3	0	2021-09-24	2021-03-09	0	0	0	0
H1	3	0	2021-09-25	2021-03-09	0	0	0	0
H1	3	0	2021-09-26	2021-03-09	0	0	0	0
H1	3	0	2021-09-27	2021-03-09	0	0	0	0
H1	3	0	2021-09-28	2021-03-09	0	0	0	0
H1	3	0	2021-09-29	2021-03-09	0	0	0	0
H1	3	0	2021-09-30	2021-03-09	0	0	0	0
H1	3	0	2021-10-01	2021-03-09	0	0	0	0
H1	3	0	2021-10-02	2021-03-09	0	0	0	0
H1	3	0	2021-10-03	2021-03-09	0	0	0	0
H1	3	0	2021-10-04	2021-03-09	0	0	0	0
H1	3	0	2021-10-05	2021-03-09	0	0	0	0
H1	3	0	2021-10-06	2021-03-09	0	0	0	0
H1	3	0	2021-10-07	2021-03-09	0	0	0	0
H1	3	0	2021-10-08	2021-03-09	0	0	0	0
H1	3	0	2021-10-09	2021-03-09	0	0	0	0
H1	3	0	2021-10-10	2021-03-09	0	0	0	0
H1	3	0	2021-10-11	2021-03-09	0	0	0	0
H1	3	0	2021-10-12	2021-03-09	0	0	0	0
H1	3	0	2021-10-13	2021-03-09	0	0	0	0
H1	3	0	2021-10-14	2021-03-09	0	0	0	0
H1	3	0	2021-10-15	2021-03-09	0	0	0	0
H1	3	0	2021-10-16	2021-03-09	0	0	0	0
H1	3	0	2021-10-17	2021-03-09	0	0	0	0
H1	3	0	2021-10-18	2021-03-09	0	0	0	0
H1	3	0	2021-10-19	2021-03-09	0	0	0	0
H1	3	0	2021-10-20	2021-03-09	0	0	0	0
H1	3	0	2021-10-21	2021-03-09	0	0	0	0
H1	3	0	2021-10-22	2021-03-09	0	0	0	0
H1	3	0	2021-10-23	2021-03-09	0	0	0	0
H1	3	0	2021-10-24	2021-03-09	0	0	0	0
H1	3	0	2021-10-25	2021-03-09	0	0	0	0
H1	3	0	2021-10-26	2021-03-09	0	0	0	0
H1	3	0	2021-10-27	2021-03-09	0	0	0	0
H1	3	0	2021-10-28	2021-03-09	0	0	0	0
H1	3	0	2021-10-29	2021-03-09	0	0	0	0
H1	3	0	2021-10-30	2021-03-09	0	0	0	0
H1	3	0	2021-10-31	2021-03-09	0	0	0	0
H1	3	0	2021-11-01	2021-03-09	0	0	0	0
H1	3	0	2021-11-02	2021-03-09	0	0	0	0
H1	3	0	2021-11-03	2021-03-09	0	0	0	0
H1	3	0	2021-11-04	2021-03-09	0	0	0	0
H1	3	0	2021-11-05	2021-03-09	0	0	0	0
H1	3	0	2021-11-06	2021-03-09	0	0	0	0
H1	3	0	2021-11-07	2021-03-09	0	0	0	0
H1	3	0	2021-11-08	2021-03-09	0	0	0	0
H1	3	0	2021-11-09	2021-03-09	0	0	0	0
H1	3	0	2021-11-10	2021-03-09	0	0	0	0
H1	3	0	2021-11-11	2021-03-09	0	0	0	0
H1	3	0	2021-11-12	2021-03-09	0	0	0	0
H1	3	0	2021-11-13	2021-03-09	0	0	0	0
H1	3	1	2021-11-14	2021-03-09	0	0	2	2
H1	3	2	2021-11-15	2021-03-09	0	0	3	3
H1	3	1	2021-11-16	2021-03-09	0	0	2	2
H1	3	1	2021-11-17	2021-03-09	0	0	3	3
H1	3	1	2021-11-18	2021-03-09	0	0	2	2
H1	3	2	2021-11-19	2021-03-09	0	0	2	2
H1	3	0	2021-11-20	2021-03-09	0	0	0	0
H1	3	1	2021-11-21	2021-03-09	0	0	2	2
H1	4	2	2021-06-03	2021-03-09	0	0	8	8
H1	4	1	2021-06-04	2021-03-09	0	0	5	5
H1	4	1	2021-06-05	2021-03-09	0	0	4	4
H1	4	0	2021-06-06	2021-03-09	0	0	0	0
H1	4	0	2021-06-07	2021-03-09	0	0	0	0
H1	4	0	2021-06-08	2021-03-09	0	0	0	0
H1	4	0	2021-06-09	2021-03-09	0	0	0	0
H1	4	0	2021-06-10	2021-03-09	0	0	0	0
H1	4	0	2021-06-11	2021-03-09	0	0	0	0
H1	4	0	2021-06-12	2021-03-09	0	0	0	0
H1	4	0	2021-06-13	2021-03-09	0	0	0	0
H1	4	0	2021-06-14	2021-03-09	0	0	0	0
H1	4	0	2021-06-15	2021-03-09	0	0	0	0
H1	4	0	2021-06-16	2021-03-09	0	0	0	0
H1	4	0	2021-06-17	2021-03-09	0	0	0	0
H1	4	0	2021-06-18	2021-03-09	0	0	0	0
H1	4	0	2021-06-19	2021-03-09	0	0	0	0
H1	4	0	2021-06-20	2021-03-09	0	0	0	0
H1	4	0	2021-06-21	2021-03-09	0	0	0	0
H1	4	0	2021-06-22	2021-03-09	0	0	0	0
H1	4	0	2021-06-23	2021-03-09	0	0	0	0
H1	4	0	2021-06-24	2021-03-09	0	0	0	0
H1	4	0	2021-06-25	2021-03-09	0	0	0	0
H1	4	0	2021-06-26	2021-03-09	0	0	0	0
H1	4	0	2021-06-27	2021-03-09	0	0	0	0
H1	4	0	2021-06-28	2021-03-09	0	0	0	0
H1	4	0	2021-06-29	2021-03-09	0	0	0	0
H1	4	0	2021-06-30	2021-03-09	0	0	0	0
H1	4	0	2021-07-01	2021-03-09	0	0	0	0
H1	4	0	2021-07-02	2021-03-09	0	0	0	0
H1	4	0	2021-07-03	2021-03-09	0	0	0	0
H1	4	0	2021-07-04	2021-03-09	0	0	0	0
H1	4	0	2021-07-05	2021-03-09	0	0	0	0
H1	4	0	2021-07-06	2021-03-09	0	0	0	0
H1	4	0	2021-07-07	2021-03-09	0	0	0	0
H1	4	0	2021-07-08	2021-03-09	0	0	0	0
H1	4	0	2021-07-09	2021-03-09	0	0	0	0
H1	4	0	2021-07-10	2021-03-09	0	0	0	0
H1	4	0	2021-07-11	2021-03-09	0	0	0	0
H1	4	0	2021-07-12	2021-03-09	0	0	0	0
H1	4	0	2021-07-13	2021-03-09	0	0	0	0
H1	4	0	2021-07-14	2021-03-09	0	0	0	0
H1	4	0	2021-07-15	2021-03-09	0	0	0	0
H1	4	0	2021-07-16	2021-03-09	0	0	0	0
H1	4	0	2021-07-17	2021-03-09	0	0	0	0
H1	4	0	2021-07-18	2021-03-09	0	0	0	0
H1	4	0	2021-07-19	2021-03-09	0	0	0	0
H1	4	0	2021-07-20	2021-03-09	0	0	0	0
H1	4	0	2021-07-21	2021-03-09	0	0	0	0
H1	4	0	2021-07-22	2021-03-09	0	0	0	0
H1	4	0	2021-07-23	2021-03-09	0	0	0	0
H1	4	0	2021-07-24	2021-03-09	0	0	0	0
H1	4	0	2021-07-25	2021-03-09	0	0	0	0
H1	4	0	2021-07-26	2021-03-09	0	0	0	0
H1	4	0	2021-07-27	2021-03-09	0	0	0	0
H1	4	0	2021-07-28	2021-03-09	0	0	0	0
H1	4	0	2021-07-29	2021-03-09	0	0	0	0
H1	4	0	2021-07-30	2021-03-09	0	0	0	0
H1	4	0	2021-07-31	2021-03-09	0	0	0	0
H1	4	0	2021-08-01	2021-03-09	0	0	0	0
H1	4	0	2021-08-02	2021-03-09	0	0	0	0
H1	4	0	2021-08-03	2021-03-09	0	0	0	0
H1	4	0	2021-08-04	2021-03-09	0	0	0	0
H1	4	0	2021-08-05	2021-03-09	0	0	0	0
H1	4	0	2021-08-06	2021-03-09	0	0	0	0
H1	4	0	2021-08-07	2021-03-09	0	0	0	0
H1	4	0	2021-08-08	2021-03-09	0	0	0	0
H1	4	0	2021-08-09	2021-03-09	0	0	0	0
H1	4	0	2021-08-10	2021-03-09	0	0	0	0
H1	4	0	2021-08-11	2021-03-09	0	0	0	0
H1	4	0	2021-08-12	2021-03-09	0	0	0	0
H1	4	1	2021-08-13	2021-03-09	0	0	1	1
H1	4	0	2021-08-14	2021-03-09	0	0	0	0
H1	4	0	2021-08-15	2021-03-09	0	0	0	0
H1	4	0	2021-08-16	2021-03-09	0	0	0	0
H1	4	0	2021-08-17	2021-03-09	0	0	0	0
H1	4	0	2021-08-18	2021-03-09	0	0	0	0
H1	4	0	2021-08-19	2021-03-09	0	0	0	0
H1	4	0	2021-08-20	2021-03-09	0	0	0	0
H1	4	1	2021-08-21	2021-03-09	0	0	2	2
H1	4	0	2021-08-22	2021-03-09	0	0	0	0
H1	4	0	2021-08-23	2021-03-09	0	0	0	0
H1	4	0	2021-08-24	2021-03-09	0	0	0	0
H1	4	0	2021-08-25	2021-03-09	0	0	0	0
H1	4	0	2021-08-26	2021-03-09	0	0	0	0
H1	4	0	2021-08-27	2021-03-09	0	0	0	0
H1	4	0	2021-08-28	2021-03-09	0	0	0	0
H1	4	0	2021-08-29	2021-03-09	0	0	0	0
H1	4	0	2021-08-30	2021-03-09	0	0	0	0
H1	4	0	2021-08-31	2021-03-09	0	0	0	0
H1	4	0	2021-09-01	2021-03-09	0	0	0	0
H1	4	0	2021-09-02	2021-03-09	0	0	0	0
H1	4	0	2021-09-03	2021-03-09	0	0	0	0
H1	4	0	2021-09-04	2021-03-09	0	0	0	0
H1	4	0	2021-09-05	2021-03-09	0	0	0	0
H1	4	0	2021-09-06	2021-03-09	0	0	0	0
H1	4	0	2021-09-07	2021-03-09	0	0	0	0
H1	4	0	2021-09-08	2021-03-09	0	0	0	0
H1	4	0	2021-09-09	2021-03-09	0	0	0	0
H1	4	0	2021-09-10	2021-03-09	0	0	0	0
H1	4	0	2021-09-11	2021-03-09	0	0	0	0
H1	4	0	2021-09-12	2021-03-09	0	0	0	0
H1	4	0	2021-09-13	2021-03-09	0	0	0	0
H1	4	0	2021-09-14	2021-03-09	0	0	0	0
H1	4	0	2021-09-15	2021-03-09	0	0	0	0
H1	4	0	2021-09-16	2021-03-09	0	0	0	0
H1	4	0	2021-09-17	2021-03-09	0	0	0	0
H1	4	0	2021-09-18	2021-03-09	0	0	0	0
H1	4	0	2021-09-19	2021-03-09	0	0	0	0
H1	4	0	2021-09-20	2021-03-09	0	0	0	0
H1	4	0	2021-09-21	2021-03-09	0	0	0	0
H1	4	0	2021-09-22	2021-03-09	0	0	0	0
H1	4	0	2021-09-23	2021-03-09	0	0	0	0
H1	4	0	2021-09-24	2021-03-09	0	0	0	0
H1	4	0	2021-09-25	2021-03-09	0	0	0	0
H1	4	0	2021-09-26	2021-03-09	0	0	0	0
H1	4	0	2021-09-27	2021-03-09	0	0	0	0
H1	4	0	2021-09-28	2021-03-09	0	0	0	0
H1	4	0	2021-09-29	2021-03-09	0	0	0	0
H1	4	1	2021-09-30	2021-03-09	0	0	3	3
H1	4	0	2021-10-01	2021-03-09	0	0	0	0
H1	4	1	2021-10-02	2021-03-09	0	0	3	3
H1	4	1	2021-10-03	2021-03-09	0	0	5	5
H1	4	0	2021-10-04	2021-03-09	0	0	0	0
H1	4	0	2021-10-05	2021-03-09	0	0	0	0
H1	4	0	2021-10-06	2021-03-09	0	0	0	0
H1	4	0	2021-10-07	2021-03-09	0	0	0	0
H1	4	0	2021-10-08	2021-03-09	0	0	0	0
H1	4	0	2021-10-09	2021-03-09	0	0	0	0
H1	4	0	2021-10-10	2021-03-09	0	0	0	0
H1	4	0	2021-10-11	2021-03-09	0	0	0	0
H1	4	0	2021-10-12	2021-03-09	0	0	0	0
H1	4	1	2021-10-13	2021-03-09	0	0	2	2
H1	4	0	2021-10-14	2021-03-09	0	0	0	0
H1	4	0	2021-10-15	2021-03-09	0	0	0	0
H1	4	0	2021-10-16	2021-03-09	0	0	0	0
H1	4	0	2021-10-17	2021-03-09	0	0	0	0
H1	4	2	2021-10-18	2021-03-09	0	0	3	3
H1	4	0	2021-10-19	2021-03-09	0	0	0	0
H1	4	0	2021-10-20	2021-03-09	0	0	0	0
H1	4	0	2021-10-21	2021-03-09	0	0	0	0
H1	4	0	2021-10-22	2021-03-09	0	0	0	0
H1	4	0	2021-10-23	2021-03-09	0	0	0	0
H1	4	0	2021-10-24	2021-03-09	0	0	0	0
H1	4	0	2021-10-25	2021-03-09	0	0	0	0
H1	4	0	2021-10-26	2021-03-09	0	0	0	0
H1	4	0	2021-10-27	2021-03-09	0	0	0	0
H1	4	0	2021-10-28	2021-03-09	0	0	0	0
H1	4	0	2021-10-29	2021-03-09	0	0	0	0
H1	4	0	2021-10-30	2021-03-09	0	0	0	0
H1	4	0	2021-10-31	2021-03-09	0	0	0	0
H1	4	0	2021-11-01	2021-03-09	0	0	0	0
H1	4	0	2021-11-02	2021-03-09	0	0	0	0
H1	4	0	2021-11-03	2021-03-09	0	0	0	0
H1	4	0	2021-11-04	2021-03-09	0	0	0	0
H1	4	0	2021-11-05	2021-03-09	0	0	0	0
H1	4	0	2021-11-06	2021-03-09	0	0	0	0
H1	4	0	2021-11-07	2021-03-09	0	0	0	0
H1	4	0	2021-11-08	2021-03-09	0	0	0	0
H1	4	0	2021-11-09	2021-03-09	0	0	0	0
H1	4	0	2021-11-10	2021-03-09	0	0	0	0
H1	4	0	2021-11-11	2021-03-09	0	0	0	0
H1	4	0	2021-11-12	2021-03-09	0	0	0	0
H1	4	0	2021-11-13	2021-03-09	0	0	0	0
H1	4	0	2021-11-14	2021-03-09	0	0	0	0
H1	4	0	2021-11-15	2021-03-09	0	0	0	0
H1	4	0	2021-11-16	2021-03-09	0	0	0	0
H1	4	0	2021-11-17	2021-03-09	0	0	0	0
H1	4	0	2021-11-18	2021-03-09	0	0	0	0
H1	4	0	2021-11-19	2021-03-09	0	0	0	0
H1	4	0	2021-11-20	2021-03-09	0	0	0	0
H1	4	0	2021-11-21	2021-03-09	0	0	0	0
H1	4	0	2021-11-22	2021-03-09	0	0	0	0
H1	4	0	2021-11-23	2021-03-09	0	0	0	0
H1	4	0	2021-11-24	2021-03-09	0	0	0	0
H1	4	0	2021-11-25	2021-03-09	0	0	0	0
H1	4	0	2021-11-26	2021-03-09	0	0	0	0
H1	4	2	2021-11-27	2021-03-09	0	0	7	7
H1	4	1	2021-11-28	2021-03-09	0	0	8	8
H1	4	0	2021-11-29	2021-03-09	0	0	0	0
H1	4	1	2021-11-30	2021-03-09	0	0	4	4
H1	4	1	2021-12-01	2021-03-09	0	0	3	3
H1	4	5	2021-12-02	2021-03-09	0	0	9	9
H1	4	3	2021-12-03	2021-03-09	0	0	8	8
H1	4	1	2021-12-04	2021-03-09	0	0	4	4
H1	4	1	2021-12-05	2021-03-09	0	0	5	5
H1	5	2	2021-02-10	2021-02-05	2	2	1	5
H1	5	1	2021-02-11	2021-02-05	6	0	0	6
H1	5	1	2021-02-12	2021-02-05	7	1	1	9
H1	5	1	2021-02-13	2021-02-05	4	2	0	6
H1	5	2	2021-02-14	2021-02-05	9	5	0	14
H1	5	2	2021-02-15	2021-02-05	10	1	0	11
H1	5	1	2021-02-16	2021-02-05	9	5	2	16
H1	5	2	2021-02-17	2021-02-05	6	1	0	7
H1	5	2	2021-02-18	2021-02-05	16	1	1	18
H1	5	0	2021-02-19	2021-02-05	0	0	0	0
H1	5	0	2021-02-20	2021-02-05	0	0	0	0
H1	5	2	2021-02-21	2021-02-05	11	1	2	14
H1	5	2	2021-02-22	2021-02-05	14	1	0	15
H1	5	2	2021-02-23	2021-02-05	5	5	1	11
H1	5	2	2021-02-24	2021-02-05	13	1	0	14
H1	5	1	2021-02-25	2021-02-05	8	0	0	8
H1	5	1	2021-02-26	2021-02-05	6	0	0	6
H1	5	2	2021-02-27	2021-02-05	10	0	0	10
H1	5	1	2021-02-28	2021-02-05	6	0	2	8
H1	5	0	2021-03-01	2021-02-05	0	0	0	0
H1	5	1	2021-03-02	2021-02-05	7	0	0	7
H1	5	1	2021-03-03	2021-02-05	4	0	1	5
H1	5	0	2021-03-04	2021-02-05	0	0	0	0
H1	5	0	2021-03-05	2021-02-05	0	0	0	0
H1	5	1	2021-03-06	2021-02-05	4	0	2	6
H1	5	1	2021-03-07	2021-02-05	3	0	1	4
H1	5	3	2021-03-08	2021-02-05	15	2	2	19
H1	5	0	2021-03-09	2021-02-05	0	0	0	0
H1	5	1	2021-03-10	2021-02-05	6	0	0	6
H1	5	1	2021-03-11	2021-02-05	5	0	0	5
H1	5	1	2021-03-12	2021-02-05	4	0	0	4
H1	5	0	2021-03-13	2021-02-05	0	0	0	0
H1	5	1	2021-03-14	2021-02-05	5	0	1	6
H1	5	0	2021-03-15	2021-02-05	0	0	0	0
H1	5	1	2021-03-16	2021-02-05	2	0	1	3
H1	5	1	2021-03-17	2021-02-05	5	0	0	5
H1	5	1	2021-03-18	2021-02-05	5	0	0	5
H1	5	0	2021-03-19	2021-02-05	0	0	0	0
H1	5	0	2021-03-20	2021-02-05	0	0	0	0
H1	5	0	2021-03-21	2021-02-05	0	0	0	0
H1	5	3	2021-03-22	2021-02-05	17	0	1	18
H1	5	1	2021-03-23	2021-02-05	6	1	0	7
H1	5	0	2021-03-24	2021-02-05	0	0	0	0
H1	5	1	2021-03-25	2021-02-05	4	0	0	4
H1	5	0	2021-03-26	2021-02-05	0	0	0	0
H1	5	0	2021-03-27	2021-02-05	0	0	0	0
H1	5	0	2021-03-28	2021-02-05	0	0	0	0
H1	5	0	2021-03-29	2021-02-05	0	0	0	0
H1	5	0	2021-03-30	2021-02-05	0	0	0	0
H1	5	0	2021-03-31	2021-02-05	0	0	0	0
H1	5	0	2021-04-01	2021-02-05	0	0	0	0
H1	5	0	2021-04-02	2021-02-05	0	0	0	0
H1	5	0	2021-04-03	2021-02-05	0	0	0	0
H1	5	0	2021-04-04	2021-02-05	0	0	0	0
H1	5	0	2021-04-05	2021-02-05	0	0	0	0
H1	5	1	2021-04-06	2021-02-05	5	2	0	7
H1	5	0	2021-04-07	2021-02-05	0	0	0	0
H1	5	1	2021-04-08	2021-02-05	2	0	1	3
H1	5	1	2021-04-09	2021-02-05	3	1	0	4
H1	5	0	2021-04-10	2021-02-05	0	0	0	0
H1	5	3	2021-04-11	2021-02-05	12	3	0	15
H1	5	1	2021-04-12	2021-02-05	7	0	0	7
H1	5	0	2021-04-13	2021-02-05	0	0	0	0
H1	5	2	2021-04-14	2021-02-05	10	4	2	16
H1	5	1	2021-04-15	2021-02-05	19	0	0	19
H1	5	1	2021-04-16	2021-02-05	10	0	0	10
H1	5	1	2021-04-17	2021-02-05	7	1	1	9
H1	5	2	2021-04-18	2021-02-05	9	2	0	11
H1	5	0	2021-04-19	2021-02-05	0	0	0	0
H1	5	1	2021-04-20	2021-02-05	5	1	0	6
H1	5	1	2021-04-21	2021-02-05	4	2	2	8
H1	5	1	2021-04-22	2021-02-05	8	0	0	8
H1	5	0	2021-04-23	2021-02-05	0	0	0	0
H1	5	2	2021-04-24	2021-02-05	12	0	2	14
H1	5	2	2021-04-25	2021-02-05	9	2	1	12
H1	5	2	2021-04-26	2021-02-05	14	1	0	15
H1	5	1	2021-04-27	2021-02-05	7	0	0	7
H1	5	1	2021-04-28	2021-02-05	1	2	2	5
H1	5	1	2021-04-29	2021-02-05	7	0	0	7
H1	5	1	2021-04-30	2021-02-05	4	1	0	5
H1	5	1	2021-05-01	2021-02-05	8	0	0	8
H1	5	1	2021-05-02	2021-02-05	6	0	0	6
H1	5	0	2021-05-03	2021-02-05	0	0	0	0
H1	5	0	2021-05-04	2021-02-05	0	0	0	0
H1	5	0	2021-05-05	2021-02-05	0	0	0	0
H1	5	4	2021-05-06	2021-02-05	12	4	1	17
H1	5	1	2021-05-07	2021-02-05	1	3	0	4
H1	5	2	2021-05-08	2021-02-05	9	2	4	15
H1	5	1	2021-05-09	2021-02-05	5	1	0	6
H1	5	2	2021-05-10	2021-02-05	9	1	1	11
H1	5	5	2021-05-11	2021-02-05	23	0	0	23
H1	5	1	2021-05-12	2021-02-05	2	2	1	5
H1	5	1	2021-05-13	2021-02-05	5	1	1	7
H1	5	1	2021-05-14	2021-02-05	6	1	0	7
H1	5	3	2021-05-15	2021-02-05	8	0	6	14
H1	5	2	2021-05-16	2021-02-05	0	12	0	12
H1	5	2	2021-05-17	2021-02-05	9	2	1	12
H1	5	0	2021-05-18	2021-02-05	0	0	0	0
H1	5	1	2021-05-19	2021-02-05	4	0	1	5
H1	5	1	2021-05-20	2021-02-05	9	2	0	11
H1	5	2	2021-05-21	2021-02-05	15	2	2	19
H1	5	0	2021-05-22	2021-02-05	0	0	0	0
H1	5	0	2021-05-23	2021-02-05	0	0	0	0
H1	5	3	2021-05-24	2021-02-05	11	7	0	18
H1	5	0	2021-05-25	2021-02-05	0	0	0	0
H1	5	0	2021-05-26	2021-02-05	0	0	0	0
H1	5	1	2021-05-27	2021-02-05	3	1	0	4
H1	5	0	2021-05-28	2021-02-05	0	0	0	0
H1	5	1	2021-05-29	2021-02-05	3	3	0	6
H1	5	2	2021-05-30	2021-02-05	7	1	0	8
H1	5	1	2021-05-31	2021-02-05	4	0	0	4
H1	5	0	2021-06-01	2021-02-05	0	0	0	0
H1	5	1	2021-06-02	2021-02-05	4	2	0	6
H1	5	2	2021-06-03	2021-02-05	6	6	1	13
H1	5	0	2021-06-04	2021-02-05	0	0	0	0
H1	5	2	2021-06-05	2021-02-05	9	5	0	14
H1	5	0	2021-06-06	2021-02-05	0	0	0	0
H1	5	0	2021-06-07	2021-02-05	0	0	0	0
H1	5	1	2021-06-08	2021-02-05	0	0	3	3
H1	5	0	2021-06-09	2021-02-05	0	0	0	0
H1	5	0	2021-06-10	2021-02-05	0	0	0	0
H1	5	0	2021-06-11	2021-02-05	0	0	0	0
H1	5	1	2021-06-12	2021-02-05	3	1	0	4
H1	5	1	2021-06-13	2021-02-05	6	0	0	6
H1	5	2	2021-06-14	2021-02-05	7	0	2	9
H1	5	0	2021-06-15	2021-02-05	0	0	0	0
H1	5	0	2021-06-16	2021-02-05	0	0	0	0
H1	5	2	2021-06-17	2021-02-05	4	4	0	8
H1	5	0	2021-06-18	2021-02-05	0	0	0	0
H1	5	1	2021-06-19	2021-02-05	3	2	1	6
H1	5	1	2021-06-20	2021-02-05	5	0	0	5
H1	5	1	2021-06-21	2021-02-05	5	0	0	5
H1	5	0	2021-06-22	2021-02-05	0	0	0	0
H1	5	0	2021-06-23	2021-02-05	0	0	0	0
H1	5	0	2021-06-24	2021-02-05	0	0	0	0
H1	5	0	2021-06-25	2021-02-05	0	0	0	0
H1	5	0	2021-06-26	2021-02-05	0	0	0	0
H1	5	0	2021-06-27	2021-02-05	0	0	0	0
H1	5	0	2021-06-28	2021-02-05	0	0	0	0
H1	5	1	2021-06-29	2021-02-05	3	0	0	3
H1	5	0	2021-06-30	2021-02-05	0	0	0	0
H1	5	0	2021-07-01	2021-02-05	0	0	0	0
H1	5	1	2021-07-02	2021-02-05	4	2	0	6
H1	5	0	2021-07-03	2021-02-05	0	0	0	0
H1	5	1	2021-07-04	2021-02-05	4	0	0	4
H1	5	1	2021-07-05	2021-02-05	3	2	1	6
H1	5	1	2021-07-06	2021-02-05	6	2	0	8
H1	5	0	2021-07-07	2021-02-05	0	0	0	0
H1	5	1	2021-07-08	2021-02-05	3	3	0	6
H1	5	0	2021-07-09	2021-02-05	0	0	0	0
H1	5	0	2021-07-10	2021-02-05	0	0	0	0
H1	5	0	2021-07-11	2021-02-05	0	0	0	0
H1	5	1	2021-07-12	2021-02-05	1	0	3	4
H1	5	0	2021-07-13	2021-02-05	0	0	0	0
H1	5	0	2021-07-14	2021-02-05	0	0	0	0
H1	5	0	2021-07-15	2021-02-05	0	0	0	0
H1	5	0	2021-07-16	2021-02-05	0	0	0	0
H1	5	0	2021-07-17	2021-02-05	0	0	0	0
H1	5	0	2021-07-18	2021-02-05	0	0	0	0
H1	5	0	2021-07-19	2021-02-05	0	0	0	0
H1	5	0	2021-07-20	2021-02-05	0	0	0	0
H1	5	0	2021-07-21	2021-02-05	0	0	0	0
H1	5	1	2021-07-22	2021-02-05	1	2	2	5
H1	5	1	2021-07-23	2021-02-05	6	0	0	6
H1	5	1	2021-07-24	2021-02-05	6	0	1	7
H1	5	0	2021-07-25	2021-02-05	0	0	0	0
H1	5	3	2021-07-26	2021-02-05	16	1	1	18
H1	5	0	2021-07-27	2021-02-05	0	0	0	0
H1	5	1	2021-07-28	2021-02-05	7	0	0	7
H1	5	1	2021-07-29	2021-02-05	4	2	0	6
H1	5	1	2021-07-30	2021-02-05	5	2	0	7
H1	5	1	2021-07-31	2021-02-05	6	1	0	7
H1	5	0	2021-08-01	2021-02-05	0	0	0	0
H1	5	0	2021-08-02	2021-02-05	0	0	0	0
H1	5	0	2021-08-03	2021-02-05	0	0	0	0
H1	5	0	2021-08-04	2021-02-05	0	0	0	0
H1	5	0	2021-08-05	2021-02-05	0	0	0	0
H1	5	0	2021-08-06	2021-02-05	0	0	0	0
H1	5	2	2021-08-07	2021-02-05	8	0	0	8
H1	5	0	2021-08-08	2021-02-05	0	0	0	0
H1	5	1	2021-08-09	2021-02-05	3	1	0	4
H1	5	1	2021-08-10	2021-02-05	4	0	0	4
H1	5	1	2021-08-11	2021-02-05	0	3	1	4
H1	5	0	2021-08-12	2021-02-05	0	0	0	0
H1	5	0	2021-08-13	2021-02-05	0	0	0	0
H1	5	1	2021-08-14	2021-02-05	0	5	0	5
H1	5	0	2021-08-15	2021-02-05	0	0	0	0
H1	5	0	2021-08-16	2021-02-05	0	0	0	0
H1	5	0	2021-08-17	2021-02-05	0	0	0	0
H1	5	0	2021-08-18	2021-02-05	0	0	0	0
H1	5	0	2021-08-19	2021-02-05	0	0	0	0
H1	5	1	2021-08-20	2021-02-05	4	0	0	4
H1	5	1	2021-08-21	2021-02-05	6	0	0	6
H1	5	2	2021-08-22	2021-02-05	13	0	0	13
H1	5	1	2021-08-23	2021-02-05	5	0	0	5
H1	5	2	2021-08-24	2021-02-05	10	0	0	10
H1	5	1	2021-08-25	2021-02-05	8	0	0	8
H1	5	1	2021-08-26	2021-02-05	2	1	0	3
H1	5	0	2021-08-27	2021-02-05	0	0	0	0
H1	5	0	2021-08-28	2021-02-05	0	0	0	0
H1	5	1	2021-08-29	2021-02-05	6	0	1	7
H1	5	0	2021-08-30	2021-02-05	0	0	0	0
H1	5	1	2021-08-31	2021-02-05	4	0	1	5
H1	5	1	2021-09-01	2021-02-05	3	1	0	4
H1	5	1	2021-09-02	2021-02-05	6	1	0	7
H1	5	0	2021-09-03	2021-02-05	0	0	0	0
H1	5	0	2021-09-04	2021-02-05	0	0	0	0
H1	5	1	2021-09-05	2021-02-05	4	1	0	5
H1	5	1	2021-09-06	2021-02-05	1	2	0	3
H1	5	0	2021-09-07	2021-02-05	0	0	0	0
H1	5	0	2021-09-08	2021-02-05	0	0	0	0
H1	5	3	2021-09-09	2021-02-05	13	2	1	16
H1	5	1	2021-09-10	2021-02-05	5	0	1	6
H1	5	0	2021-09-11	2021-02-05	0	0	0	0
H1	5	2	2021-09-12	2021-02-05	8	0	0	8
H1	5	0	2021-09-13	2021-02-05	0	0	0	0
H1	5	0	2021-09-14	2021-02-05	0	0	0	0
H1	5	0	2021-09-15	2021-02-05	0	0	0	0
H1	5	2	2021-09-16	2021-02-05	0	0	3	3
H1	5	1	2021-09-17	2021-02-05	1	0	1	2
H1	5	1	2021-09-18	2021-02-05	4	0	0	4
H1	5	2	2021-09-19	2021-02-05	7	0	0	7
H1	5	1	2021-09-20	2021-02-05	3	0	0	3
H1	5	1	2021-09-21	2021-02-05	0	1	0	1
H1	5	0	2021-09-22	2021-02-05	0	0	0	0
H1	5	0	2021-09-23	2021-02-05	0	0	0	0
H1	5	2	2021-09-24	2021-02-05	10	0	0	10
H1	5	0	2021-09-25	2021-02-05	0	0	0	0
H1	5	2	2021-09-26	2021-02-05	7	0	0	7
H1	5	0	2021-09-27	2021-02-05	0	0	0	0
H1	5	0	2021-09-28	2021-02-05	0	0	0	0
H1	5	0	2021-09-29	2021-02-05	0	0	0	0
H1	5	1	2021-09-30	2021-02-05	0	0	0	0
H1	5	1	2021-10-01	2021-02-05	6	0	1	7
H1	5	1	2021-10-02	2021-02-05	5	0	1	6
H1	5	0	2021-10-03	2021-02-05	0	0	0	0
H1	5	0	2021-10-04	2021-02-05	0	0	0	0
H1	5	1	2021-10-05	2021-02-05	3	0	0	3
H1	5	1	2021-10-06	2021-02-05	1	0	3	4
H1	5	0	2021-10-07	2021-02-05	0	0	0	0
H1	5	1	2021-10-08	2021-02-05	1	0	0	1
H1	5	2	2021-10-09	2021-02-05	6	0	2	8
H1	5	1	2021-10-10	2021-02-05	4	0	2	6
H1	5	0	2021-10-11	2021-02-05	0	0	0	0
H1	5	0	2021-10-12	2021-02-05	0	0	0	0
H1	5	0	2021-10-13	2021-02-05	0	0	0	0
H1	5	3	2021-10-14	2021-02-05	4	0	1	5
H1	5	0	2021-10-15	2021-02-05	0	0	0	0
H1	5	0	2021-10-16	2021-02-05	0	0	0	0
H1	5	0	2021-10-17	2021-02-05	0	0	0	0
H1	5	1	2021-10-18	2021-02-05	2	0	2	4
H1	5	0	2021-10-19	2021-02-05	0	0	0	0
H1	5	0	2021-10-20	2021-02-05	0	0	0	0
H1	5	1	2021-10-21	2021-02-05	0	0	1	1
H1	5	2	2021-10-22	2021-02-05	2	6	0	8
H1	5	2	2021-10-23	2021-02-05	6	1	0	7
H1	5	2	2021-10-24	2021-02-05	8	3	0	11
H1	5	1	2021-10-25	2021-02-05	1	1	0	2
H1	5	2	2021-10-26	2021-02-05	3	2	0	5
H1	5	1	2021-10-27	2021-02-05	2	1	1	4
H1	5	2	2021-10-28	2021-02-05	3	5	2	10
H1	5	1	2021-10-29	2021-02-05	3	1	1	5
H1	5	2	2021-10-30	2021-02-05	3	1	2	6
H1	5	1	2021-10-31	2021-02-05	2	0	1	3
H1	5	1	2021-11-01	2021-02-05	1	0	1	2
H1	5	0	2021-11-02	2021-02-05	0	0	0	0
H1	5	0	2021-11-03	2021-02-05	0	0	0	0
H1	5	2	2021-11-04	2021-02-05	1	2	4	7
H1	5	0	2021-11-05	2021-02-05	0	0	0	0
H1	5	0	2021-11-06	2021-02-05	0	0	0	0
H1	5	0	2021-11-07	2021-02-05	0	0	0	0
H1	5	0	2021-11-08	2021-02-05	0	0	0	0
H1	5	0	2021-11-09	2021-02-05	0	0	0	0
H1	5	0	2021-11-10	2021-02-05	0	0	0	0
H1	5	0	2021-11-11	2021-02-05	0	0	0	0
H1	5	2	2021-11-12	2021-02-05	1	4	4	9
H1	5	1	2021-11-13	2021-02-05	1	2	0	3
H1	5	1	2021-11-14	2021-02-05	2	1	1	4
H1	5	0	2021-11-15	2021-02-05	0	0	0	0
H1	5	0	2021-11-16	2021-02-05	0	0	0	0
H1	5	0	2021-11-17	2021-02-05	0	0	0	0
H1	5	2	2021-11-18	2021-02-05	6	2	1	9
H1	5	2	2021-11-19	2021-02-05	3	0	1	4
H1	5	3	2021-11-20	2021-02-05	13	0	1	14
H1	5	2	2021-11-21	2021-02-05	5	0	1	6
H1	5	1	2021-11-22	2021-02-05	3	0	1	4
H1	5	3	2021-11-23	2021-02-05	11	1	1	13
H1	5	1	2021-11-24	2021-02-05	6	0	3	9
H1	5	1	2021-11-25	2021-02-05	0	2	1	3
H1	5	3	2021-11-26	2021-02-05	5	4	2	11
H1	5	0	2021-11-27	2021-02-05	0	0	0	0
H1	5	0	2021-11-28	2021-02-05	0	0	0	0
H1	5	0	2021-11-29	2021-02-05	0	0	0	0
H1	5	0	2021-11-30	2021-02-05	0	0	0	0
H1	5	0	2021-12-01	2021-02-05	0	0	0	0
H1	5	0	2021-12-02	2021-02-05	0	0	0	0
H1	5	2	2021-12-03	2021-02-05	6	2	1	9
H1	5	1	2021-12-04	2021-02-05	0	0	3	3
H1	5	0	2021-12-05	2021-02-05	0	0	0	0
H1	5	0	2021-12-06	2021-02-05	0	0	0	0
H1	5	0	2021-12-07	2021-02-05	0	0	0	0
H1	5	0	2021-12-08	2021-02-05	0	0	0	0
H1	5	0	2021-12-09	2021-02-05	0	0	0	0
H1	5	1	2021-12-10	2021-02-05	2	0	0	2
H1	7	1	2021-04-24	2021-03-16	3	2	0	5
H1	7	1	2021-04-25	2021-03-16	3	0	0	3
H1	7	2	2021-04-26	2021-03-16	9	0	0	9
H1	7	0	2021-04-27	2021-03-16	0	0	0	0
H1	7	2	2021-04-28	2021-03-16	8	1	1	10
H1	7	1	2021-04-29	2021-03-16	5	0	0	5
H1	7	0	2021-04-30	2021-03-16	0	0	0	0
H1	7	0	2021-05-01	2021-03-16	0	0	0	0
H1	7	0	2021-05-02	2021-03-16	0	0	0	0
H1	7	2	2021-05-03	2021-03-16	8	1	0	9
H1	7	1	2021-05-04	2021-03-16	5	2	0	7
H1	7	1	2021-05-05	2021-03-16	4	0	2	6
H1	7	1	2021-05-06	2021-03-16	3	0	0	3
H1	7	0	2021-05-07	2021-03-16	0	0	0	0
H1	7	1	2021-05-08	2021-03-16	4	0	0	4
H1	7	1	2021-05-09	2021-03-16	12	0	0	12
H1	7	1	2021-05-10	2021-03-16	7	0	0	7
H1	7	0	2021-05-11	2021-03-16	0	0	0	0
H1	7	1	2021-05-12	2021-03-16	2	4	1	7
H1	7	1	2021-05-13	2021-03-16	4	1	0	5
H1	7	1	2021-05-14	2021-03-16	4	1	0	5
H1	7	1	2021-05-15	2021-03-16	4	1	0	5
H1	7	0	2021-05-16	2021-03-16	0	0	0	0
H1	7	0	2021-05-17	2021-03-16	0	0	0	0
H1	7	0	2021-05-18	2021-03-16	0	0	0	0
H1	7	0	2021-05-19	2021-03-16	0	0	0	0
H1	7	0	2021-05-20	2021-03-16	0	0	0	0
H1	7	0	2021-05-21	2021-03-16	0	0	0	0
H1	7	0	2021-05-22	2021-03-16	0	0	0	0
H1	7	0	2021-05-23	2021-03-16	0	0	0	0
H1	7	0	2021-05-24	2021-03-16	0	0	0	0
H1	7	0	2021-05-25	2021-03-16	0	0	0	0
H1	7	0	2021-05-26	2021-03-16	0	0	0	0
H1	7	0	2021-05-27	2021-03-16	0	0	0	0
H1	7	0	2021-05-28	2021-03-16	0	0	0	0
H1	7	0	2021-05-29	2021-03-16	0	0	0	0
H1	7	0	2021-05-30	2021-03-16	0	0	0	0
H1	7	0	2021-05-31	2021-03-16	0	0	0	0
H1	7	0	2021-06-01	2021-03-16	0	0	0	0
H1	7	0	2021-06-02	2021-03-16	0	0	0	0
H1	7	0	2021-06-03	2021-03-16	0	0	0	0
H1	7	0	2021-06-04	2021-03-16	0	0	0	0
H1	7	0	2021-06-05	2021-03-16	0	0	0	0
H1	7	0	2021-06-06	2021-03-16	0	0	0	0
H1	7	0	2021-06-07	2021-03-16	0	0	0	0
H1	7	0	2021-06-08	2021-03-16	0	0	0	0
H1	7	0	2021-06-09	2021-03-16	0	0	0	0
H1	7	0	2021-06-10	2021-03-16	0	0	0	0
H1	7	0	2021-06-11	2021-03-16	0	0	0	0
H1	7	0	2021-06-12	2021-03-16	0	0	0	0
H1	7	0	2021-06-13	2021-03-16	0	0	0	0
H1	7	0	2021-06-14	2021-03-16	0	0	0	0
H1	7	0	2021-06-15	2021-03-16	0	0	0	0
H1	7	0	2021-06-16	2021-03-16	0	0	0	0
H1	7	0	2021-06-17	2021-03-16	0	0	0	0
H1	7	0	2021-06-18	2021-03-16	0	0	0	0
H1	7	0	2021-06-19	2021-03-16	0	0	0	0
H1	7	0	2021-06-20	2021-03-16	0	0	0	0
H1	7	0	2021-06-21	2021-03-16	0	0	0	0
H1	7	0	2021-06-22	2021-03-16	0	0	0	0
H1	7	0	2021-06-23	2021-03-16	0	0	0	0
H1	7	0	2021-06-24	2021-03-16	0	0	0	0
H1	7	0	2021-06-25	2021-03-16	0	0	0	0
H1	7	0	2021-06-26	2021-03-16	0	0	0	0
H1	7	0	2021-06-27	2021-03-16	0	0	0	0
H1	7	0	2021-06-28	2021-03-16	0	0	0	0
H1	7	0	2021-06-29	2021-03-16	0	0	0	0
H1	7	0	2021-06-30	2021-03-16	0	0	0	0
H1	7	0	2021-07-01	2021-03-16	0	0	0	0
H1	7	0	2021-07-02	2021-03-16	0	0	0	0
H1	7	0	2021-07-03	2021-03-16	0	0	0	0
H1	7	0	2021-07-04	2021-03-16	0	0	0	0
H1	7	0	2021-07-05	2021-03-16	0	0	0	0
H1	7	0	2021-07-06	2021-03-16	0	0	0	0
H1	7	0	2021-07-07	2021-03-16	0	0	0	0
H1	7	0	2021-07-08	2021-03-16	0	0	0	0
H1	7	0	2021-07-09	2021-03-16	0	0	0	0
H1	7	0	2021-07-10	2021-03-16	0	0	0	0
H1	7	0	2021-07-11	2021-03-16	0	0	0	0
H1	7	0	2021-07-12	2021-03-16	0	0	0	0
H1	7	0	2021-07-13	2021-03-16	0	0	0	0
H1	7	0	2021-07-14	2021-03-16	0	0	0	0
H1	7	0	2021-07-15	2021-03-16	0	0	0	0
H1	7	0	2021-07-16	2021-03-16	0	0	0	0
H1	7	0	2021-07-17	2021-03-16	0	0	0	0
H1	7	0	2021-07-18	2021-03-16	0	0	0	0
H1	7	0	2021-07-19	2021-03-16	0	0	0	0
H1	7	0	2021-07-20	2021-03-16	0	0	0	0
H1	7	0	2021-07-21	2021-03-16	0	0	0	0
H1	7	0	2021-07-22	2021-03-16	0	0	0	0
H1	7	0	2021-07-23	2021-03-16	0	0	0	0
H1	7	0	2021-07-24	2021-03-16	0	0	0	0
H1	7	0	2021-07-25	2021-03-16	0	0	0	0
H1	7	0	2021-07-26	2021-03-16	0	0	0	0
H1	7	0	2021-07-27	2021-03-16	0	0	0	0
H1	7	0	2021-07-28	2021-03-16	0	0	0	0
H1	7	0	2021-07-29	2021-03-16	0	0	0	0
H1	7	0	2021-07-30	2021-03-16	0	0	0	0
H1	7	0	2021-07-31	2021-03-16	0	0	0	0
H1	7	0	2021-08-01	2021-03-16	0	0	0	0
H1	7	0	2021-08-02	2021-03-16	0	0	0	0
H1	7	0	2021-08-03	2021-03-16	0	0	0	0
H1	7	0	2021-08-04	2021-03-16	0	0	0	0
H1	7	0	2021-08-05	2021-03-16	0	0	0	0
H1	7	0	2021-08-06	2021-03-16	0	0	0	0
H1	7	0	2021-08-07	2021-03-16	0	0	0	0
H1	7	0	2021-08-08	2021-03-16	0	0	0	0
H1	7	0	2021-08-09	2021-03-16	0	0	0	0
H1	7	0	2021-08-10	2021-03-16	0	0	0	0
H1	7	2	2021-08-11	2021-03-16	5	3	1	9
H1	7	0	2021-08-12	2021-03-16	0	0	0	0
H1	7	0	2021-08-13	2021-03-16	0	0	0	0
H1	7	0	2021-08-14	2021-03-16	0	0	0	0
H1	7	0	2021-08-15	2021-03-16	0	0	0	0
H1	7	0	2021-08-16	2021-03-16	0	0	0	0
H1	7	0	2021-08-17	2021-03-16	0	0	0	0
H1	7	0	2021-08-18	2021-03-16	0	0	0	0
H1	7	0	2021-08-19	2021-03-16	0	0	0	0
H1	7	0	2021-08-20	2021-03-16	0	0	0	0
H1	7	0	2021-08-21	2021-03-16	0	0	0	0
H1	7	0	2021-08-22	2021-03-16	0	0	0	0
H1	7	0	2021-08-23	2021-03-16	0	0	0	0
H1	7	0	2021-08-24	2021-03-16	0	0	0	0
H1	7	0	2021-08-25	2021-03-16	0	0	0	0
H1	7	0	2021-08-26	2021-03-16	0	0	0	0
H1	7	0	2021-08-27	2021-03-16	0	0	0	0
H1	7	0	2021-08-28	2021-03-16	0	0	0	0
H1	7	0	2021-08-29	2021-03-16	0	0	0	0
H1	7	0	2021-08-30	2021-03-16	0	0	0	0
H1	7	0	2021-08-31	2021-03-16	0	0	0	0
H1	7	0	2021-09-01	2021-03-16	0	0	0	0
H1	7	0	2021-09-02	2021-03-16	0	0	0	0
H1	7	0	2021-09-03	2021-03-16	0	0	0	0
H1	7	0	2021-09-04	2021-03-16	0	0	0	0
H1	7	0	2021-09-05	2021-03-16	0	0	0	0
H1	7	0	2021-09-06	2021-03-16	0	0	0	0
H1	7	0	2021-09-07	2021-03-16	0	0	0	0
H1	7	0	2021-09-08	2021-03-16	0	0	0	0
H1	7	0	2021-09-09	2021-03-16	0	0	0	0
H1	7	0	2021-09-10	2021-03-16	0	0	0	0
H1	7	0	2021-09-11	2021-03-16	0	0	0	0
H1	7	0	2021-09-12	2021-03-16	0	0	0	0
H1	7	0	2021-09-13	2021-03-16	0	0	0	0
H1	7	0	2021-09-14	2021-03-16	0	0	0	0
H1	7	0	2021-09-15	2021-03-16	0	0	0	0
H1	7	0	2021-09-16	2021-03-16	0	0	0	0
H1	7	0	2021-09-17	2021-03-16	0	0	0	0
H1	7	0	2021-09-18	2021-03-16	0	0	0	0
H1	7	0	2021-09-19	2021-03-16	0	0	0	0
H1	7	0	2021-09-20	2021-03-16	0	0	0	0
H1	7	0	2021-09-21	2021-03-16	0	0	0	0
H1	7	0	2021-09-22	2021-03-16	0	0	0	0
H1	7	0	2021-09-23	2021-03-16	0	0	0	0
H1	7	0	2021-09-24	2021-03-16	0	0	0	0
H1	7	0	2021-09-25	2021-03-16	0	0	0	0
H1	7	0	2021-09-26	2021-03-16	0	0	0	0
H1	7	0	2021-09-27	2021-03-16	0	0	0	0
H1	7	0	2021-09-28	2021-03-16	0	0	0	0
H1	7	0	2021-09-29	2021-03-16	0	0	0	0
H1	7	0	2021-09-30	2021-03-16	0	0	0	0
H1	7	0	2021-10-01	2021-03-16	0	0	0	0
H1	7	0	2021-10-02	2021-03-16	0	0	0	0
H1	7	0	2021-10-03	2021-03-16	0	0	0	0
H1	7	0	2021-10-04	2021-03-16	0	0	0	0
H1	7	0	2021-10-05	2021-03-16	0	0	0	0
H1	7	0	2021-10-06	2021-03-16	0	0	0	0
H1	7	0	2021-10-07	2021-03-16	0	0	0	0
H1	7	0	2021-10-08	2021-03-16	0	0	0	0
H1	7	0	2021-10-09	2021-03-16	0	0	0	0
H1	7	0	2021-10-10	2021-03-16	0	0	0	0
H1	7	0	2021-10-11	2021-03-16	0	0	0	0
H1	7	0	2021-10-12	2021-03-16	0	0	0	0
H1	7	0	2021-10-13	2021-03-16	0	0	0	0
H1	7	0	2021-10-14	2021-03-16	0	0	0	0
H1	7	0	2021-10-15	2021-03-16	0	0	0	0
H1	7	0	2021-10-16	2021-03-16	0	0	0	0
H1	7	0	2021-10-17	2021-03-16	0	0	0	0
H1	7	0	2021-10-18	2021-03-16	0	0	0	0
H1	7	0	2021-10-19	2021-03-16	0	0	0	0
H1	7	0	2021-10-20	2021-03-16	0	0	0	0
H1	7	0	2021-10-21	2021-03-16	0	0	0	0
H1	7	0	2021-10-22	2021-03-16	0	0	0	0
H1	7	0	2021-10-23	2021-03-16	0	0	0	0
H1	7	0	2021-10-24	2021-03-16	0	0	0	0
H1	7	0	2021-10-25	2021-03-16	0	0	0	0
H1	7	0	2021-10-26	2021-03-16	0	0	0	0
H1	7	0	2021-10-27	2021-03-16	0	0	0	0
H1	7	0	2021-10-28	2021-03-16	0	0	0	0
H1	7	0	2021-10-29	2021-03-16	0	0	0	0
H1	7	0	2021-10-30	2021-03-16	0	0	0	0
H1	7	0	2021-10-31	2021-03-16	0	0	0	0
H1	7	0	2021-11-01	2021-03-16	0	0	0	0
H1	7	0	2021-11-02	2021-03-16	0	0	0	0
H1	7	0	2021-11-03	2021-03-16	0	0	0	0
H1	7	0	2021-11-04	2021-03-16	0	0	0	0
H1	7	0	2021-11-05	2021-03-16	0	0	0	0
H1	7	0	2021-11-06	2021-03-16	0	0	0	0
H1	7	0	2021-11-07	2021-03-16	0	0	0	0
H1	7	0	2021-11-08	2021-03-16	0	0	0	0
H1	7	0	2021-11-09	2021-03-16	0	0	0	0
H1	7	0	2021-11-10	2021-03-16	0	0	0	0
H1	7	0	2021-11-11	2021-03-16	0	0	0	0
H1	7	0	2021-11-12	2021-03-16	0	0	0	0
H1	7	0	2021-11-13	2021-03-16	0	0	0	0
H1	7	0	2021-11-14	2021-03-16	0	0	0	0
H1	7	0	2021-11-15	2021-03-16	0	0	0	0
H1	7	0	2021-11-16	2021-03-16	0	0	0	0
H1	7	0	2021-11-17	2021-03-16	0	0	0	0
H1	7	1	2021-11-18	2021-03-16	1	0	1	2
H1	7	1	2021-11-19	2021-03-16	2	0	2	4
H1	7	2	2021-11-20	2021-03-16	6	3	1	10
H1	7	2	2021-11-21	2021-03-16	8	2	1	11
H1	7	0	2021-11-22	2021-03-16	0	0	0	0
H1	7	1	2021-11-23	2021-03-16	2	3	0	5
H1	7	1	2021-11-24	2021-03-16	2	1	1	4
H1	10	2	2021-07-31	2021-03-18	7	0	0	7
H1	10	0	2021-08-01	2021-03-18	0	0	0	0
H1	10	2	2021-08-02	2021-03-18	6	0	0	6
H1	10	1	2021-08-03	2021-03-18	2	1	1	4
H1	10	1	2021-08-04	2021-03-18	3	0	2	5
H1	10	1	2021-08-05	2021-03-18	5	1	0	6
H1	10	0	2021-08-06	2021-03-18	0	0	0	0
H1	10	2	2021-08-07	2021-03-18	8	2	0	10
H1	10	2	2021-08-08	2021-03-18	7	0	1	8
H1	10	3	2021-08-09	2021-03-18	9	2	1	12
H1	10	1	2021-08-10	2021-03-18	3	1	1	5
H1	10	0	2021-08-11	2021-03-18	0	0	0	0
H1	10	0	2021-08-12	2021-03-18	0	0	0	0
H1	10	0	2021-08-13	2021-03-18	0	0	0	0
H1	10	1	2021-08-14	2021-03-18	0	2	0	2
H1	10	1	2021-08-15	2021-03-18	3	2	0	5
H1	10	1	2021-08-16	2021-03-18	5	0	0	5
H1	10	0	2021-08-17	2021-03-18	0	0	0	0
H1	10	1	2021-08-18	2021-03-18	3	0	0	3
H1	10	0	2021-08-19	2021-03-18	0	0	0	0
H1	10	1	2021-08-20	2021-03-18	3	1	1	5
H1	10	1	2021-08-21	2021-03-18	2	1	0	3
H1	10	2	2021-08-22	2021-03-18	11	0	0	11
H1	10	0	2021-08-23	2021-03-18	0	0	0	0
H1	10	2	2021-08-24	2021-03-18	9	2	1	12
H1	10	1	2021-08-25	2021-03-18	4	0	0	4
H1	10	2	2021-08-26	2021-03-18	10	0	0	10
H1	10	2	2021-08-27	2021-03-18	0	4	2	6
H1	10	1	2021-08-28	2021-03-18	4	0	0	4
H1	10	0	2021-08-29	2021-03-18	0	0	0	0
H1	10	0	2021-08-30	2021-03-18	0	0	0	0
H1	10	0	2021-08-31	2021-03-18	0	0	0	0
H1	10	0	2021-09-01	2021-03-18	0	0	0	0
H1	10	0	2021-09-02	2021-03-18	0	0	0	0
H1	10	0	2021-09-03	2021-03-18	0	0	0	0
H1	10	0	2021-09-04	2021-03-18	0	0	0	0
H1	10	0	2021-09-05	2021-03-18	0	0	0	0
H1	10	0	2021-09-06	2021-03-18	0	0	0	0
H1	10	0	2021-09-07	2021-03-18	0	0	0	0
H1	10	0	2021-09-08	2021-03-18	0	0	0	0
H1	10	0	2021-09-09	2021-03-18	0	0	0	0
H1	10	0	2021-09-10	2021-03-18	0	0	0	0
H1	10	0	2021-09-11	2021-03-18	0	0	0	0
H1	10	0	2021-09-12	2021-03-18	0	0	0	0
H1	10	0	2021-09-13	2021-03-18	0	0	0	0
H1	10	0	2021-09-14	2021-03-18	0	0	0	0
H1	10	0	2021-09-15	2021-03-18	0	0	0	0
H1	10	0	2021-09-16	2021-03-18	0	0	0	0
H1	10	0	2021-09-17	2021-03-18	0	0	0	0
H1	10	0	2021-09-18	2021-03-18	0	0	0	0
H1	10	1	2021-09-19	2021-03-18	1	1	0	2
H1	10	1	2021-09-20	2021-03-18	3	1	0	4
H1	10	0	2021-09-21	2021-03-18	0	0	0	0
H1	10	0	2021-09-22	2021-03-18	0	0	0	0
H1	10	0	2021-09-23	2021-03-18	0	0	0	0
H1	10	0	2021-09-24	2021-03-18	0	0	0	0
H1	10	0	2021-09-25	2021-03-18	0	0	0	0
H1	10	1	2021-09-26	2021-03-18	0	0	2	2
H1	10	1	2021-09-27	2021-03-18	1	3	0	4
H1	10	1	2021-09-28	2021-03-18	2	1	0	3
H1	10	1	2021-09-29	2021-03-18	5	0	1	6
H1	10	0	2021-09-30	2021-03-18	0	0	0	0
H1	10	1	2021-10-01	2021-03-18	0	0	4	4
H1	10	0	2021-10-02	2021-03-18	0	0	0	0
H1	10	0	2021-10-03	2021-03-18	0	0	0	0
H1	10	0	2021-10-04	2021-03-18	0	0	0	0
H1	10	0	2021-10-05	2021-03-18	0	0	0	0
H1	10	0	2021-10-06	2021-03-18	0	0	0	0
H1	10	0	2021-10-07	2021-03-18	0	0	0	0
H1	10	0	2021-10-08	2021-03-18	0	0	0	0
H1	10	0	2021-10-09	2021-03-18	0	0	0	0
H1	10	0	2021-10-10	2021-03-18	0	0	0	0
H1	10	0	2021-10-11	2021-03-18	0	0	0	0
H1	10	0	2021-10-12	2021-03-18	0	0	0	0
H1	10	1	2021-10-13	2021-03-18	0	0	1	1
H2	1	2	2021-02-09	2021-02-02	2	9	0	11
H2	1	1	2021-02-10	2021-02-02	3	0	0	3
H2	1	1	2021-02-11	2021-02-02	7	0	1	8
H2	1	0	2021-02-12	2021-02-02	0	0	0	0
H2	1	1	2021-02-13	2021-02-02	8	0	0	8
H2	1	0	2021-02-14	2021-02-02	0	0	0	0
H2	1	0	2021-02-15	2021-02-02	0	0	0	0
H2	1	0	2021-02-16	2021-02-02	0	0	0	0
H2	1	0	2021-02-17	2021-02-02	0	0	0	0
H2	1	0	2021-02-18	2021-02-02	0	0	0	0
H2	1	1	2021-02-19	2021-02-02	2	1	2	5
H2	2	1	2021-05-11	2021-05-06	2	3	1	6
H2	2	0	2021-05-12	2021-05-06	0	0	0	0
H2	2	1	2021-05-13	2021-05-06	5	0	1	6
H2	2	0	2021-05-14	2021-05-06	0	0	0	0
H2	2	0	2021-05-15	2021-05-06	0	0	0	0
H2	2	0	2021-05-16	2021-05-06	0	0	0	0
H2	2	0	2021-05-17	2021-05-06	0	0	0	0
H2	2	0	2021-05-18	2021-05-06	0	0	0	0
H2	2	0	2021-05-19	2021-05-06	0	0	0	0
H2	2	0	2021-05-20	2021-05-06	0	0	0	0
H2	2	0	2021-05-21	2021-05-06	0	0	0	0
H2	2	0	2021-05-22	2021-05-06	0	0	0	0
H2	2	0	2021-05-23	2021-05-06	0	0	0	0
H2	2	0	2021-05-24	2021-05-06	0	0	0	0
H2	2	0	2021-05-25	2021-05-06	0	0	0	0
H2	2	0	2021-05-26	2021-05-06	0	0	0	0
H2	2	0	2021-05-27	2021-05-06	0	0	0	0
H2	2	0	2021-05-28	2021-05-06	0	0	0	0
H2	2	0	2021-05-29	2021-05-06	0	0	0	0
H2	2	0	2021-05-30	2021-05-06	0	0	0	0
H2	2	0	2021-05-31	2021-05-06	0	0	0	0
H2	2	0	2021-06-01	2021-05-06	0	0	0	0
H2	2	0	2021-06-02	2021-05-06	0	0	0	0
H2	2	0	2021-06-03	2021-05-06	0	0	0	0
H2	2	0	2021-06-04	2021-05-06	0	0	0	0
H2	2	0	2021-06-05	2021-05-06	0	0	0	0
H2	2	0	2021-06-06	2021-05-06	0	0	0	0
H2	2	0	2021-06-07	2021-05-06	0	0	0	0
H2	2	0	2021-06-08	2021-05-06	0	0	0	0
H2	2	1	2021-06-09	2021-05-06	1	0	0	1
H2	2	2	2021-06-10	2021-05-06	6	0	1	7
H2	2	1	2021-06-11	2021-05-06	5	0	0	5
H2	2	1	2021-06-12	2021-05-06	4	0	0	4
H2	2	1	2021-06-13	2021-05-06	4	0	1	5
H2	2	0	2021-06-14	2021-05-06	0	0	0	0
H2	2	0	2021-06-15	2021-05-06	0	0	0	0
H2	2	0	2021-06-16	2021-05-06	0	0	0	0
H2	2	0	2021-06-17	2021-05-06	0	0	0	0
H2	2	0	2021-06-18	2021-05-06	0	0	0	0
H2	2	0	2021-06-19	2021-05-06	0	0	0	0
H2	2	0	2021-06-20	2021-05-06	0	0	0	0
H2	2	0	2021-06-21	2021-05-06	0	0	0	0
H2	2	0	2021-06-22	2021-05-06	0	0	0	0
H2	2	0	2021-06-23	2021-05-06	0	0	0	0
H2	2	0	2021-06-24	2021-05-06	0	0	0	0
H2	2	0	2021-06-25	2021-05-06	0	0	0	0
H2	2	0	2021-06-26	2021-05-06	0	0	0	0
H2	2	0	2021-06-27	2021-05-06	0	0	0	0
H2	2	0	2021-06-28	2021-05-06	0	0	0	0
H2	2	0	2021-06-29	2021-05-06	0	0	0	0
H2	2	0	2021-06-30	2021-05-06	0	0	0	0
H2	2	0	2021-07-01	2021-05-06	0	0	0	0
H2	2	0	2021-07-02	2021-05-06	0	0	0	0
H2	2	0	2021-07-03	2021-05-06	0	0	0	0
H2	2	0	2021-07-04	2021-05-06	0	0	0	0
H2	2	0	2021-07-05	2021-05-06	0	0	0	0
H2	2	0	2021-07-06	2021-05-06	0	0	0	0
H2	2	0	2021-07-07	2021-05-06	0	0	0	0
H2	2	0	2021-07-08	2021-05-06	0	0	0	0
H2	2	0	2021-07-09	2021-05-06	0	0	0	0
H2	2	0	2021-07-10	2021-05-06	0	0	0	0
H2	2	0	2021-07-11	2021-05-06	0	0	0	0
H2	2	0	2021-07-12	2021-05-06	0	0	0	0
H2	2	0	2021-07-13	2021-05-06	0	0	0	0
H2	2	0	2021-07-14	2021-05-06	0	0	0	0
H2	2	0	2021-07-15	2021-05-06	0	0	0	0
H2	2	0	2021-07-16	2021-05-06	0	0	0	0
H2	2	0	2021-07-17	2021-05-06	0	0	0	0
H2	2	0	2021-07-18	2021-05-06	0	0	0	0
H2	2	0	2021-07-19	2021-05-06	0	0	0	0
H2	2	0	2021-07-20	2021-05-06	0	0	0	0
H2	2	0	2021-07-21	2021-05-06	0	0	0	0
H2	2	0	2021-07-22	2021-05-06	0	0	0	0
H2	2	0	2021-07-23	2021-05-06	0	0	0	0
H2	2	0	2021-07-24	2021-05-06	0	0	0	0
H2	2	0	2021-07-25	2021-05-06	0	0	0	0
H2	2	0	2021-07-26	2021-05-06	0	0	0	0
H2	2	0	2021-07-27	2021-05-06	0	0	0	0
H2	2	0	2021-07-28	2021-05-06	0	0	0	0
H2	2	0	2021-07-29	2021-05-06	0	0	0	0
H2	2	0	2021-07-30	2021-05-06	0	0	0	0
H2	2	0	2021-07-31	2021-05-06	0	0	0	0
H2	2	0	2021-08-01	2021-05-06	0	0	0	0
H2	2	0	2021-08-02	2021-05-06	0	0	0	0
H2	2	0	2021-08-03	2021-05-06	0	0	0	0
H2	2	0	2021-08-04	2021-05-06	0	0	0	0
H2	2	0	2021-08-05	2021-05-06	0	0	0	0
H2	2	0	2021-08-06	2021-05-06	0	0	0	0
H2	2	0	2021-08-07	2021-05-06	0	0	0	0
H2	2	0	2021-08-08	2021-05-06	0	0	0	0
H2	2	0	2021-08-09	2021-05-06	0	0	0	0
H2	2	0	2021-08-10	2021-05-06	0	0	0	0
H2	2	0	2021-08-11	2021-05-06	0	0	0	0
H2	2	0	2021-08-12	2021-05-06	0	0	0	0
H2	2	0	2021-08-13	2021-05-06	0	0	0	0
H2	2	0	2021-08-14	2021-05-06	0	0	0	0
H2	2	0	2021-08-15	2021-05-06	0	0	0	0
H2	2	0	2021-08-16	2021-05-06	0	0	0	0
H2	2	0	2021-08-17	2021-05-06	0	0	0	0
H2	2	0	2021-08-18	2021-05-06	0	0	0	0
H2	2	0	2021-08-19	2021-05-06	0	0	0	0
H2	2	1	2021-08-20	2021-05-06	2	0	1	3
H2	2	0	2021-08-21	2021-05-06	0	0	0	0
H2	2	1	2021-08-22	2021-05-06	7	0	0	7
H2	2	0	2021-08-23	2021-05-06	0	0	0	0
H2	2	2	2021-08-24	2021-05-06	10	1	0	11
H2	2	1	2021-08-25	2021-05-06	5	1	2	8
H2	2	0	2021-08-26	2021-05-06	0	0	0	0
H2	2	1	2021-08-27	2021-05-06	4	0	0	4
H2	2	0	2021-08-28	2021-05-06	0	0	0	0
H2	2	0	2021-08-29	2021-05-06	0	0	0	0
H2	2	0	2021-08-30	2021-05-06	0	0	0	0
H2	2	0	2021-08-31	2021-05-06	0	0	0	0
H2	2	0	2021-09-01	2021-05-06	0	0	0	0
H2	2	0	2021-09-02	2021-05-06	0	0	0	0
H2	2	0	2021-09-03	2021-05-06	0	0	0	0
H2	2	0	2021-09-04	2021-05-06	0	0	0	0
H2	2	0	2021-09-05	2021-05-06	0	0	0	0
H2	2	0	2021-09-06	2021-05-06	0	0	0	0
H2	2	0	2021-09-07	2021-05-06	0	0	0	0
H2	2	0	2021-09-08	2021-05-06	0	0	0	0
H2	2	0	2021-09-09	2021-05-06	0	0	0	0
H2	2	0	2021-09-10	2021-05-06	0	0	0	0
H2	2	0	2021-09-11	2021-05-06	0	0	0	0
H2	2	0	2021-09-12	2021-05-06	0	0	0	0
H2	2	0	2021-09-13	2021-05-06	0	0	0	0
H2	2	0	2021-09-14	2021-05-06	0	0	0	0
H2	2	0	2021-09-15	2021-05-06	0	0	0	0
H2	2	0	2021-09-16	2021-05-06	0	0	0	0
H2	2	0	2021-09-17	2021-05-06	0	0	0	0
H2	2	0	2021-09-18	2021-05-06	0	0	0	0
H2	2	0	2021-09-19	2021-05-06	0	0	0	0
H2	2	0	2021-09-20	2021-05-06	0	0	0	0
H2	2	0	2021-09-21	2021-05-06	0	0	0	0
H2	2	0	2021-09-22	2021-05-06	0	0	0	0
H2	2	0	2021-09-23	2021-05-06	0	0	0	0
H2	2	0	2021-09-24	2021-05-06	0	0	0	0
H2	2	0	2021-09-25	2021-05-06	0	0	0	0
H2	2	0	2021-09-26	2021-05-06	0	0	0	0
H2	2	0	2021-09-27	2021-05-06	0	0	0	0
H2	2	0	2021-09-28	2021-05-06	0	0	0	0
H2	2	0	2021-09-29	2021-05-06	0	0	0	0
H2	2	0	2021-09-30	2021-05-06	0	0	0	0
H2	2	0	2021-10-01	2021-05-06	0	0	0	0
H2	2	0	2021-10-02	2021-05-06	0	0	0	0
H2	2	0	2021-10-03	2021-05-06	0	0	0	0
H2	2	0	2021-10-04	2021-05-06	0	0	0	0
H2	2	0	2021-10-05	2021-05-06	0	0	0	0
H2	2	0	2021-10-06	2021-05-06	0	0	0	0
H2	2	0	2021-10-07	2021-05-06	0	0	0	0
H2	2	0	2021-10-08	2021-05-06	0	0	0	0
H2	2	0	2021-10-09	2021-05-06	0	0	0	0
H2	2	0	2021-10-10	2021-05-06	0	0	0	0
H2	2	0	2021-10-11	2021-05-06	0	0	0	0
H2	2	0	2021-10-12	2021-05-06	0	0	0	0
H2	2	0	2021-10-13	2021-05-06	0	0	0	0
H2	2	0	2021-10-14	2021-05-06	0	0	0	0
H2	2	0	2021-10-15	2021-05-06	0	0	0	0
H2	2	0	2021-10-16	2021-05-06	0	0	0	0
H2	2	0	2021-10-17	2021-05-06	0	0	0	0
H2	2	0	2021-10-18	2021-05-06	0	0	0	0
H2	2	0	2021-10-19	2021-05-06	0	0	0	0
H2	2	0	2021-10-20	2021-05-06	0	0	0	0
H2	2	0	2021-10-21	2021-05-06	0	0	0	0
H2	2	0	2021-10-22	2021-05-06	0	0	0	0
H2	2	0	2021-10-23	2021-05-06	0	0	0	0
H2	2	0	2021-10-24	2021-05-06	0	0	0	0
H2	2	0	2021-10-25	2021-05-06	0	0	0	0
H2	2	0	2021-10-26	2021-05-06	0	0	0	0
H2	2	0	2021-10-27	2021-05-06	0	0	0	0
H2	2	0	2021-10-28	2021-05-06	0	0	0	0
H2	2	0	2021-10-29	2021-05-06	0	0	0	0
H2	2	0	2021-10-30	2021-05-06	0	0	0	0
H2	2	0	2021-10-31	2021-05-06	0	0	0	0
H2	2	0	2021-11-01	2021-05-06	0	0	0	0
H2	2	0	2021-11-02	2021-05-06	0	0	0	0
H2	2	0	2021-11-03	2021-05-06	0	0	0	0
H2	2	0	2021-11-04	2021-05-06	0	0	0	0
H2	2	0	2021-11-05	2021-05-06	0	0	0	0
H2	2	0	2021-11-06	2021-05-06	0	0	0	0
H2	2	0	2021-11-07	2021-05-06	0	0	0	0
H2	2	0	2021-11-08	2021-05-06	0	0	0	0
H2	2	0	2021-11-09	2021-05-06	0	0	0	0
H2	2	0	2021-11-10	2021-05-06	0	0	0	0
H2	2	0	2021-11-11	2021-05-06	0	0	0	0
H2	2	2	2021-11-12	2021-05-06	2	2	0	4
H2	2	0	2021-11-13	2021-05-06	0	0	0	0
H2	2	0	2021-11-14	2021-05-06	0	0	0	0
H2	2	1	2021-11-15	2021-05-06	3	1	0	4
H2	2	0	2021-11-16	2021-05-06	0	0	0	0
H2	2	1	2021-11-17	2021-05-06	5	2	0	7
H2	2	1	2021-11-18	2021-05-06	5	3	0	8
H2	2	0	2021-11-19	2021-05-06	0	0	0	0
H2	2	0	2021-11-20	2021-05-06	0	0	0	0
H2	2	2	2021-11-21	2021-05-06	1	3	2	6
H2	3	1	2021-04-15	2021-03-09	7	0	0	7
H2	3	3	2021-04-16	2021-03-09	9	0	1	10
H2	3	2	2021-04-17	2021-03-09	13	0	0	13
H2	3	3	2021-04-18	2021-03-09	15	0	0	15
H2	3	0	2021-04-19	2021-03-09	0	0	0	0
H2	3	1	2021-04-20	2021-03-09	7	0	0	7
H2	3	2	2021-04-21	2021-03-09	4	1	3	8
H2	3	0	2021-04-22	2021-03-09	0	0	0	0
H2	3	0	2021-04-23	2021-03-09	0	0	0	0
H2	3	0	2021-04-24	2021-03-09	0	0	0	0
H2	3	0	2021-04-25	2021-03-09	0	0	0	0
H2	3	0	2021-04-26	2021-03-09	0	0	0	0
H2	3	0	2021-04-27	2021-03-09	0	0	0	0
H2	3	1	2021-04-28	2021-03-09	5	1	0	6
H2	3	1	2021-04-29	2021-03-09	0	2	0	2
H2	3	2	2021-04-30	2021-03-09	10	0	2	12
H2	3	0	2021-05-01	2021-03-09	0	0	0	0
H2	3	2	2021-05-02	2021-03-09	5	2	0	7
H2	3	0	2021-05-03	2021-03-09	0	0	0	0
H2	3	0	2021-05-04	2021-03-09	0	0	0	0
H2	3	1	2021-05-05	2021-03-09	3	1	0	4
H2	3	0	2021-05-06	2021-03-09	0	0	0	0
H2	3	0	2021-05-07	2021-03-09	0	0	0	0
H2	3	0	2021-05-08	2021-03-09	0	0	0	0
H2	3	0	2021-05-09	2021-03-09	0	0	0	0
H2	3	0	2021-05-10	2021-03-09	0	0	0	0
H2	3	0	2021-05-11	2021-03-09	0	0	0	0
H2	3	0	2021-05-12	2021-03-09	0	0	0	0
H2	3	0	2021-05-13	2021-03-09	0	0	0	0
H2	3	0	2021-05-14	2021-03-09	0	0	0	0
H2	3	0	2021-05-15	2021-03-09	0	0	0	0
H2	3	0	2021-05-16	2021-03-09	0	0	0	0
H2	3	0	2021-05-17	2021-03-09	0	0	0	0
H2	3	0	2021-05-18	2021-03-09	0	0	0	0
H2	3	0	2021-05-19	2021-03-09	0	0	0	0
H2	3	0	2021-05-20	2021-03-09	0	0	0	0
H2	3	0	2021-05-21	2021-03-09	0	0	0	0
H2	3	0	2021-05-22	2021-03-09	0	0	0	0
H2	3	0	2021-05-23	2021-03-09	0	0	0	0
H2	3	0	2021-05-24	2021-03-09	0	0	0	0
H2	3	0	2021-05-25	2021-03-09	0	0	0	0
H2	3	0	2021-05-26	2021-03-09	0	0	0	0
H2	3	0	2021-05-27	2021-03-09	0	0	0	0
H2	3	0	2021-05-28	2021-03-09	0	0	0	0
H2	3	0	2021-05-29	2021-03-09	0	0	0	0
H2	3	0	2021-05-30	2021-03-09	0	0	0	0
H2	3	0	2021-05-31	2021-03-09	0	0	0	0
H2	3	0	2021-06-01	2021-03-09	0	0	0	0
H2	3	1	2021-06-02	2021-03-09	3	0	1	4
H2	3	2	2021-06-03	2021-03-09	11	0	1	12
H2	3	1	2021-06-04	2021-03-09	6	0	0	6
H2	3	1	2021-06-05	2021-03-09	8	1	0	9
H2	3	2	2021-06-06	2021-03-09	15	0	0	15
H2	3	2	2021-06-07	2021-03-09	10	0	0	10
H2	3	3	2021-06-08	2021-03-09	13	0	1	14
H2	3	1	2021-06-09	2021-03-09	8	0	0	8
H2	3	1	2021-06-10	2021-03-09	8	0	0	8
H2	3	2	2021-06-11	2021-03-09	14	0	0	14
H2	3	1	2021-06-12	2021-03-09	2	1	2	5
H2	3	0	2021-06-13	2021-03-09	0	0	0	0
H2	3	0	2021-06-14	2021-03-09	0	0	0	0
H2	3	0	2021-06-15	2021-03-09	0	0	0	0
H2	3	0	2021-06-16	2021-03-09	0	0	0	0
H2	3	0	2021-06-17	2021-03-09	0	0	0	0
H2	3	0	2021-06-18	2021-03-09	0	0	0	0
H2	3	0	2021-06-19	2021-03-09	0	0	0	0
H2	3	0	2021-06-20	2021-03-09	0	0	0	0
H2	3	0	2021-06-21	2021-03-09	0	0	0	0
H2	3	0	2021-06-22	2021-03-09	0	0	0	0
H2	3	0	2021-06-23	2021-03-09	0	0	0	0
H2	3	0	2021-06-24	2021-03-09	0	0	0	0
H2	3	0	2021-06-25	2021-03-09	0	0	0	0
H2	3	0	2021-06-26	2021-03-09	0	0	0	0
H2	3	0	2021-06-27	2021-03-09	0	0	0	0
H2	3	0	2021-06-28	2021-03-09	0	0	0	0
H2	3	0	2021-06-29	2021-03-09	0	0	0	0
H2	3	0	2021-06-30	2021-03-09	0	0	0	0
H2	3	0	2021-07-01	2021-03-09	0	0	0	0
H2	3	0	2021-07-02	2021-03-09	0	0	0	0
H2	3	0	2021-07-03	2021-03-09	0	0	0	0
H2	3	0	2021-07-04	2021-03-09	0	0	0	0
H2	3	0	2021-07-05	2021-03-09	0	0	0	0
H2	3	0	2021-07-06	2021-03-09	0	0	0	0
H2	3	0	2021-07-07	2021-03-09	0	0	0	0
H2	3	0	2021-07-08	2021-03-09	0	0	0	0
H2	3	0	2021-07-09	2021-03-09	0	0	0	0
H2	3	0	2021-07-10	2021-03-09	0	0	0	0
H2	3	0	2021-07-11	2021-03-09	0	0	0	0
H2	3	0	2021-07-12	2021-03-09	0	0	0	0
H2	3	0	2021-07-13	2021-03-09	0	0	0	0
H2	3	0	2021-07-14	2021-03-09	0	0	0	0
H2	3	0	2021-07-15	2021-03-09	0	0	0	0
H2	3	0	2021-07-16	2021-03-09	0	0	0	0
H2	3	0	2021-07-17	2021-03-09	0	0	0	0
H2	3	0	2021-07-18	2021-03-09	0	0	0	0
H2	3	0	2021-07-19	2021-03-09	0	0	0	0
H2	3	0	2021-07-20	2021-03-09	0	0	0	0
H2	3	0	2021-07-21	2021-03-09	0	0	0	0
H2	3	0	2021-07-22	2021-03-09	0	0	0	0
H2	3	0	2021-07-23	2021-03-09	0	0	0	0
H2	3	0	2021-07-24	2021-03-09	0	0	0	0
H2	3	0	2021-07-25	2021-03-09	0	0	0	0
H2	3	0	2021-07-26	2021-03-09	0	0	0	0
H2	3	0	2021-07-27	2021-03-09	0	0	0	0
H2	3	0	2021-07-28	2021-03-09	0	0	0	0
H2	3	0	2021-07-29	2021-03-09	0	0	0	0
H2	3	0	2021-07-30	2021-03-09	0	0	0	0
H2	3	0	2021-07-31	2021-03-09	0	0	0	0
H2	3	0	2021-08-01	2021-03-09	0	0	0	0
H2	3	0	2021-08-02	2021-03-09	0	0	0	0
H2	3	0	2021-08-03	2021-03-09	0	0	0	0
H2	3	0	2021-08-04	2021-03-09	0	0	0	0
H2	3	0	2021-08-05	2021-03-09	0	0	0	0
H2	3	0	2021-08-06	2021-03-09	0	0	0	0
H2	3	0	2021-08-07	2021-03-09	0	0	0	0
H2	3	0	2021-08-08	2021-03-09	0	0	0	0
H2	3	0	2021-08-09	2021-03-09	0	0	0	0
H2	3	0	2021-08-10	2021-03-09	0	0	0	0
H2	3	0	2021-08-11	2021-03-09	0	0	0	0
H2	3	0	2021-08-12	2021-03-09	0	0	0	0
H2	3	0	2021-08-13	2021-03-09	0	0	0	0
H2	3	2	2021-08-14	2021-03-09	9	2	2	13
H2	3	2	2021-08-15	2021-03-09	11	6	1	18
H2	3	2	2021-08-16	2021-03-09	10	0	2	12
H2	3	3	2021-08-17	2021-03-09	17	0	0	17
H2	3	2	2021-08-18	2021-03-09	13	1	0	14
H2	3	1	2021-08-19	2021-03-09	9	0	0	9
H2	3	2	2021-08-20	2021-03-09	8	0	0	8
H2	3	0	2021-08-21	2021-03-09	0	0	0	0
H2	3	2	2021-08-22	2021-03-09	9	1	0	10
H2	3	1	2021-08-23	2021-03-09	7	0	0	7
H2	3	0	2021-08-24	2021-03-09	0	0	0	0
H2	3	1	2021-08-25	2021-03-09	5	0	0	5
H2	3	0	2021-08-26	2021-03-09	0	0	0	0
H2	3	0	2021-08-27	2021-03-09	0	0	0	0
H2	3	0	2021-08-28	2021-03-09	0	0	0	0
H2	3	0	2021-08-29	2021-03-09	0	0	0	0
H2	3	0	2021-08-30	2021-03-09	0	0	0	0
H2	3	0	2021-08-31	2021-03-09	0	0	0	0
H2	3	0	2021-09-01	2021-03-09	0	0	0	0
H2	3	0	2021-09-02	2021-03-09	0	0	0	0
H2	3	0	2021-09-03	2021-03-09	0	0	0	0
H2	3	0	2021-09-04	2021-03-09	0	0	0	0
H2	3	0	2021-09-05	2021-03-09	0	0	0	0
H2	3	0	2021-09-06	2021-03-09	0	0	0	0
H2	3	0	2021-09-07	2021-03-09	0	0	0	0
H2	3	0	2021-09-08	2021-03-09	0	0	0	0
H2	3	0	2021-09-09	2021-03-09	0	0	0	0
H2	3	0	2021-09-10	2021-03-09	0	0	0	0
H2	3	0	2021-09-11	2021-03-09	0	0	0	0
H2	3	0	2021-09-12	2021-03-09	0	0	0	0
H2	3	0	2021-09-13	2021-03-09	0	0	0	0
H2	3	0	2021-09-14	2021-03-09	0	0	0	0
H2	3	0	2021-09-15	2021-03-09	0	0	0	0
H2	3	0	2021-09-16	2021-03-09	0	0	0	0
H2	3	0	2021-09-17	2021-03-09	0	0	0	0
H2	3	0	2021-09-18	2021-03-09	0	0	0	0
H2	3	0	2021-09-19	2021-03-09	0	0	0	0
H2	3	0	2021-09-20	2021-03-09	0	0	0	0
H2	3	0	2021-09-21	2021-03-09	0	0	0	0
H2	3	0	2021-09-22	2021-03-09	0	0	0	0
H2	3	0	2021-09-23	2021-03-09	0	0	0	0
H2	3	0	2021-09-24	2021-03-09	0	0	0	0
H2	3	0	2021-09-25	2021-03-09	0	0	0	0
H2	3	0	2021-09-26	2021-03-09	0	0	0	0
H2	3	0	2021-09-27	2021-03-09	0	0	0	0
H2	3	0	2021-09-28	2021-03-09	0	0	0	0
H2	3	0	2021-09-29	2021-03-09	0	0	0	0
H2	3	0	2021-09-30	2021-03-09	0	0	0	0
H2	3	0	2021-10-01	2021-03-09	0	0	0	0
H2	3	0	2021-10-02	2021-03-09	0	0	0	0
H2	3	0	2021-10-03	2021-03-09	0	0	0	0
H2	3	0	2021-10-04	2021-03-09	0	0	0	0
H2	3	0	2021-10-05	2021-03-09	0	0	0	0
H2	3	0	2021-10-06	2021-03-09	0	0	0	0
H2	3	0	2021-10-07	2021-03-09	0	0	0	0
H2	3	0	2021-10-08	2021-03-09	0	0	0	0
H2	3	0	2021-10-09	2021-03-09	0	0	0	0
H2	3	0	2021-10-10	2021-03-09	0	0	0	0
H2	3	0	2021-10-11	2021-03-09	0	0	0	0
H2	3	0	2021-10-12	2021-03-09	0	0	0	0
H2	3	1	2021-10-13	2021-03-09	2	1	0	3
H2	3	2	2021-10-14	2021-03-09	4	1	0	5
H2	3	0	2021-10-15	2021-03-09	0	0	0	0
H2	3	0	2021-10-16	2021-03-09	0	0	0	0
H2	3	0	2021-10-17	2021-03-09	0	0	0	0
H2	3	1	2021-10-18	2021-03-09	2	1	0	3
H2	3	0	2021-10-19	2021-03-09	0	0	0	0
H2	3	0	2021-10-20	2021-03-09	0	0	0	0
H2	3	0	2021-10-21	2021-03-09	0	0	0	0
H2	3	0	2021-10-22	2021-03-09	0	0	0	0
H2	3	0	2021-10-23	2021-03-09	0	0	0	0
H2	3	0	2021-10-24	2021-03-09	0	0	0	0
H2	3	0	2021-10-25	2021-03-09	0	0	0	0
H2	3	0	2021-10-26	2021-03-09	0	0	0	0
H2	3	0	2021-10-27	2021-03-09	0	0	0	0
H2	3	0	2021-10-28	2021-03-09	0	0	0	0
H2	3	0	2021-10-29	2021-03-09	0	0	0	0
H2	3	0	2021-10-30	2021-03-09	0	0	0	0
H2	3	0	2021-10-31	2021-03-09	0	0	0	0
H2	3	0	2021-11-01	2021-03-09	0	0	0	0
H2	3	0	2021-11-02	2021-03-09	0	0	0	0
H2	3	0	2021-11-03	2021-03-09	0	0	0	0
H2	3	0	2021-11-04	2021-03-09	0	0	0	0
H2	3	0	2021-11-05	2021-03-09	0	0	0	0
H2	3	0	2021-11-06	2021-03-09	0	0	0	0
H2	3	0	2021-11-07	2021-03-09	0	0	0	0
H2	3	1	2021-11-08	2021-03-09	0	0	1	1
H2	3	0	2021-11-09	2021-03-09	0	0	0	0
H2	3	0	2021-11-10	2021-03-09	0	0	0	0
H2	3	0	2021-11-11	2021-03-09	0	0	0	0
H2	3	1	2021-11-12	2021-03-09	0	2	0	2
H2	3	0	2021-11-13	2021-03-09	0	0	0	0
H2	3	0	2021-11-14	2021-03-09	0	0	0	0
H2	3	0	2021-11-15	2021-03-09	0	0	0	0
H2	3	0	2021-11-16	2021-03-09	0	0	0	0
H2	3	0	2021-11-17	2021-03-09	0	0	0	0
H2	3	0	2021-11-18	2021-03-09	0	0	0	0
H2	3	0	2021-11-19	2021-03-09	0	0	0	0
H2	3	2	2021-11-20	2021-03-09	13	2	0	15
H2	3	1	2021-11-21	2021-03-09	7	3	0	10
H2	3	1	2021-11-22	2021-03-09	4	1	0	5
H2	3	1	2021-11-23	2021-03-09	1	2	0	3
H2	3	1	2021-11-24	2021-03-09	5	1	0	6
H2	3	2	2021-11-25	2021-03-09	6	2	0	8
H2	3	3	2021-11-26	2021-03-09	14	3	1	18
H2	3	0	2021-11-27	2021-03-09	0	0	0	0
H2	3	1	2021-11-28	2021-03-09	5	1	0	6
H2	3	0	2021-11-29	2021-03-09	0	0	0	0
H2	3	0	2021-11-30	2021-03-09	0	0	0	0
H2	3	1	2021-12-01	2021-03-09	1	0	2	3
H2	3	2	2021-12-02	2021-03-09	7	0	0	7
H2	3	4	2021-12-03	2021-03-09	19	1	0	20
H2	4	1	2021-02-15	2021-02-03	3	0	0	3
H2	4	0	2021-02-16	2021-02-03	0	0	0	0
H2	4	0	2021-02-17	2021-02-03	0	0	0	0
H2	4	1	2021-02-18	2021-02-03	5	0	0	5
H2	4	0	2021-02-19	2021-02-03	0	0	0	0
H2	4	0	2021-02-20	2021-02-03	0	0	0	0
H2	4	0	2021-02-21	2021-02-03	0	0	0	0
H2	4	0	2021-02-22	2021-02-03	0	0	0	0
H2	4	0	2021-02-23	2021-02-03	0	0	0	0
H2	4	0	2021-02-24	2021-02-03	0	0	0	0
H2	4	0	2021-02-25	2021-02-03	0	0	0	0
H2	4	0	2021-02-26	2021-02-03	0	0	0	0
H2	4	0	2021-02-27	2021-02-03	0	0	0	0
H2	4	0	2021-02-28	2021-02-03	0	0	0	0
H2	4	0	2021-03-01	2021-02-03	0	0	0	0
H2	4	0	2021-03-02	2021-02-03	0	0	0	0
H2	4	0	2021-03-03	2021-02-03	0	0	0	0
H2	4	0	2021-03-04	2021-02-03	0	0	0	0
H2	4	0	2021-03-05	2021-02-03	0	0	0	0
H2	4	0	2021-03-06	2021-02-03	0	0	0	0
H2	4	0	2021-03-07	2021-02-03	0	0	0	0
H2	4	0	2021-03-08	2021-02-03	0	0	0	0
H2	4	0	2021-03-09	2021-02-03	0	0	0	0
H2	4	0	2021-03-10	2021-02-03	0	0	0	0
H2	4	0	2021-03-11	2021-02-03	0	0	0	0
H2	4	0	2021-03-12	2021-02-03	0	0	0	0
H2	4	0	2021-03-13	2021-02-03	0	0	0	0
H2	4	0	2021-03-14	2021-02-03	0	0	0	0
H2	4	0	2021-03-15	2021-02-03	0	0	0	0
H2	4	0	2021-03-16	2021-02-03	0	0	0	0
H2	4	0	2021-03-17	2021-02-03	0	0	0	0
H2	4	0	2021-03-18	2021-02-03	0	0	0	0
H2	4	0	2021-03-19	2021-02-03	0	0	0	0
H2	4	0	2021-03-20	2021-02-03	0	0	0	0
H2	4	0	2021-03-21	2021-02-03	0	0	0	0
H2	4	0	2021-03-22	2021-02-03	0	0	0	0
H2	4	0	2021-03-23	2021-02-03	0	0	0	0
H2	4	0	2021-03-24	2021-02-03	0	0	0	0
H2	4	0	2021-03-25	2021-02-03	0	0	0	0
H2	4	0	2021-03-26	2021-02-03	0	0	0	0
H2	4	0	2021-03-27	2021-02-03	0	0	0	0
H2	4	0	2021-03-28	2021-02-03	0	0	0	0
H2	4	0	2021-03-29	2021-02-03	0	0	0	0
H2	4	0	2021-03-30	2021-02-03	0	0	0	0
H2	4	0	2021-03-31	2021-02-03	0	0	0	0
H2	4	0	2021-04-01	2021-02-03	0	0	0	0
H2	4	0	2021-04-02	2021-02-03	0	0	0	0
H2	4	0	2021-04-03	2021-02-03	0	0	0	0
H2	4	0	2021-04-04	2021-02-03	0	0	0	0
H2	4	0	2021-04-05	2021-02-03	0	0	0	0
H2	4	0	2021-04-06	2021-02-03	0	0	0	0
H2	4	0	2021-04-07	2021-02-03	0	0	0	0
H2	4	0	2021-04-08	2021-02-03	0	0	0	0
H2	4	0	2021-04-09	2021-02-03	0	0	0	0
H2	4	0	2021-04-10	2021-02-03	0	0	0	0
H2	4	0	2021-04-11	2021-02-03	0	0	0	0
H2	4	0	2021-04-12	2021-02-03	0	0	0	0
H2	4	0	2021-04-13	2021-02-03	0	0	0	0
H2	4	0	2021-04-14	2021-02-03	0	0	0	0
H2	4	0	2021-04-15	2021-02-03	0	0	0	0
H2	4	0	2021-04-16	2021-02-03	0	0	0	0
H2	4	0	2021-04-17	2021-02-03	0	0	0	0
H2	4	0	2021-04-18	2021-02-03	0	0	0	0
H2	4	0	2021-04-19	2021-02-03	0	0	0	0
H2	4	0	2021-04-20	2021-02-03	0	0	0	0
H2	4	0	2021-04-21	2021-02-03	0	0	0	0
H2	4	0	2021-04-22	2021-02-03	0	0	0	0
H2	4	0	2021-04-23	2021-02-03	0	0	0	0
H2	4	0	2021-04-24	2021-02-03	0	0	0	0
H2	4	0	2021-04-25	2021-02-03	0	0	0	0
H2	4	0	2021-04-26	2021-02-03	0	0	0	0
H2	4	0	2021-04-27	2021-02-03	0	0	0	0
H2	4	0	2021-04-28	2021-02-03	0	0	0	0
[truncated: 2,824 more rows]

## Sheet: Progeny data
Treatment	Repetition	hatching day	2_instar_molt	3_instar_molt	4_instar_molt	pre_pupa_molt	mass (g)	Death date
H1	1	2021-02-13	2021-02-17	0	0	0	0	2021-02-19
H1	2	2021-02-17	0	0	0	0	0	2021-02-20
H1	3	2021-02-13	0	0	0	0	0	2021-02-15
H1	4	2021-02-14	2021-02-19	2021-02-23	2021-02-27	2021-03-03	0.135
H1	5	2021-02-15	2021-02-20	2021-02-24	2021-02-28	2021-03-05	0.138
H1	6	2021-02-15	2021-02-20	2021-02-25	2021-02-28	2021-03-04	0.123
H1	7	2021-02-15	2021-02-20	2021-02-23	2021-02-27	0	0	2021-03-02
H1	8	2021-02-16	2021-02-20	2021-02-24	2021-02-28	2021-03-04	0.115
H1	9	2021-02-16	2021-02-21	2021-02-24	2021-02-28	2021-03-05	0.137
H1	10	2021-02-16	2021-02-20	2021-02-23	2021-02-27	2021-03-03	0.121
H1	11	2021-04-18	2021-04-23	2021-04-26	2021-04-30	2021-05-04	0.14
H1	12	2021-04-19	2021-04-25	2021-04-28	2021-05-02	2021-05-05	0.137
H1	13	2021-04-19	2021-04-22	2021-04-27	2021-04-30	2021-05-04	0.152
H1	14	2021-04-19	2021-04-24	2021-04-27	2021-04-30	2021-05-04	0.139
H1	15	2021-04-19	2021-04-24	2021-04-28	2021-05-02	2021-05-06	0.129
H1	16	2021-04-19	2021-04-24	2021-04-28	2021-05-03	2021-05-07	0.161
H1	17	2021-04-20	2021-04-24	2021-04-28	2021-05-01	2021-05-05	0.127
H1	18	2021-04-20	2021-04-25	2021-04-28	2021-05-01	2021-05-05	0.161
H1	19	2021-04-20	2021-04-25	2021-04-28	2021-05-02	2021-05-05	0.132
H1	20	2021-04-21	2021-04-26	2021-04-29	2021-05-05	2021-05-08	0.105
H1	21	2021-02-20	2021-02-24	2021-02-28	2021-03-04	2021-03-08	0.12
H1	22	2021-02-19	2021-02-24	2021-03-01	2021-03-05	2021-03-09	0.105
H1	23	2021-02-18	0	0	0	0	0	2021-02-21
H1	24	2021-02-22	0	0	0	0	0	2021-02-24
H1	25	2021-02-23	2021-02-27	2021-03-03	2021-03-07	2021-03-11	0.137
H1	26	2021-02-18	0	0	0	0	0	2021-02-22
H1	27	2021-02-18	2021-02-23	2021-02-27	2021-03-03	2021-03-07	0.133
H1	28	2021-02-18	2021-02-22	2021-02-27	2021-03-03	2021-03-07	0.095
H1	29	2021-02-18	2021-02-22	2021-02-26	2021-03-03	2021-03-08	0.115
H1	30	2021-02-19	0	0	0	0	0	2021-02-22
H1	31	2021-04-30	2021-05-04	2021-05-07	2021-05-13	2021-05-17	0.129
H1	32	2021-04-30	2021-05-05	2021-05-08	2021-05-12	2021-05-16	0.166
H1	33	2021-05-01	2021-05-05	2021-05-08	0	0	0	2021-05-09
H1	34	2021-05-02	2021-05-07	2021-05-13	2021-05-18	2021-05-24	0.144
H1	35	2021-05-02	2021-05-09	2021-05-12	2021-05-15	2021-05-20	0.097
H1	36	2021-05-02	00:00:00	0	0	0	0	2021-05-10
H1	37	2021-05-02	2021-05-06	2021-05-11	2021-05-14	2021-05-19	0.145
H1	38	2021-05-02	2021-05-06	2021-05-09	2021-05-14	2021-05-17	0.161
H1	39	2021-05-02	2021-05-06	2021-05-10	2021-05-14	2021-05-19	0.1
H1	40	2021-05-04	2021-05-17	2021-05-24	2021-05-28	2021-06-02	0.079
H1	41	2021-08-07	2021-08-15	0	0	0	0	2021-08-28
H1	42	2021-08-07	2021-08-11	2021-08-16	2021-08-23	2021-08-27	0.1
H1	43	2021-08-07	2021-08-22	2021-08-28	2021-09-03	2021-09-09	0.08
H1	44	2021-08-07	2021-08-11	2021-08-16	2021-08-21	2021-08-27	0.08
H1	45	2021-08-09	2021-08-18	2021-08-23	0	0	0	2021-08-26
H1	46	2021-08-08	2021-08-17	2021-08-22	2021-08-24	2021-08-27	0.081
H1	47	2021-08-14	2021-08-18	0	0	0	0	2021-08-25
H1	48	2021-08-11	2021-08-17	2021-08-21	2021-08-31	2021-09-06	0.111
H1	49	2021-08-11	2021-08-16	2021-08-22	0	0	0	2021-08-26
H1	50	2021-08-12	2021-08-19	2021-08-24	0	0	0	2021-08-27
H2	1	2021-02-17	0	0	0	0	0	2021-02-19
H2	2	2021-02-17	0	0	0	0	0	2021-02-21
H2	3	2021-02-18	2021-02-22	2021-02-28	0	0	0	2021-03-04
H2	4	2021-02-18	2021-02-22	2021-02-27	2021-03-03	2021-03-09	0.092
H2	5	2021-02-18	0	0	0	0	0	2021-02-22
H2	6	2021-02-18	2021-02-24	2021-03-09	2021-03-12	2021-03-16	0.077
H2	7	2021-02-18	2021-02-23	2021-03-03	2021-03-07	2021-03-12	0.155
H2	8	2021-02-18	2021-02-25	2021-03-03	2021-03-07	2021-03-12	0.107
H2	9	2021-02-18	0	0	0	0	0	2021-02-23
H2	10	2021-02-19	2021-02-22	2021-02-27	2021-03-03	2021-03-09	0.098
H2	11	2021-05-21	0	0	0	0	0	2021-05-23
H2	12	2021-05-21	0	0	0	0	0	2021-05-24
H2	13	2021-08-28	0	0	0	0	0	2021-09-04
H2	14	2021-06-17	2021-06-24	0	0	0	0	2021-06-26
H2	15	2021-06-18	2021-06-22	2021-06-26	2021-06-30	2021-07-06	0.103
H2	16	2021-06-18	2021-06-25	2021-06-29	2021-07-04	2021-07-09	0.126
H2	17	2021-06-18	2021-06-23	2021-06-27	2021-07-03	2021-07-08	0.1
H2	18	2021-06-18	2021-06-23	2021-06-27	2021-07-03	2021-07-09	0.067
H2	19	2021-06-19	2021-06-24	0	0	0	0	2021-06-26
H2	20	2021-06-19	2021-06-26	2021-06-30	2021-07-05	2021-07-10	0.104
H2	21	2021-04-22	2021-04-27	2021-05-01	2021-05-05	2021-05-09	0.127
H2	22	2021-04-22	2021-04-27	2021-04-30	2021-05-03	2021-05-07	0.128
H2	23	2021-04-22	2021-04-29	2021-05-02	2021-05-07	2021-05-11	0.128
H2	24	2021-04-22	2021-04-27	2021-04-30	2021-05-03	2021-05-07	0.137
H2	25	2021-04-22	0	0	0	0	0	2021-04-29
H2	26	2021-04-22	2021-04-27	2021-05-01	2021-05-04	2021-05-10	0.144
H2	27	2021-04-23	2021-04-27	2021-04-30	2021-05-04	2021-05-07	0.136
H2	28	2021-04-23	2021-04-29	2021-05-02	2021-05-06	0	0	2021-05-07
H2	29	2021-04-23	2021-04-27	2021-05-02	2021-05-05	2021-05-09	0.158
H2	30	2021-04-23	2021-04-28	2021-05-01	2021-05-05	2021-05-08	0.155
H2	31	2021-02-23	2021-02-28	2021-03-03	2021-03-07	2021-03-11	0.107
H2	32	2021-02-25	2021-02-28	2021-03-04	2021-03-09	2021-03-14	0.099
H2	33	2021-02-25	2021-03-01	2021-03-04	2021-03-09	0	0	2021-03-10
H2	34	2021-02-25	2021-03-01	2021-03-05	0	0	0	2021-03-08
H2	35	2021-05-17	2021-05-22	2021-05-27	2021-05-31	2021-06-04	0.144
H2	36	2021-05-21	0	0	0	0	0	2021-05-23
H2	37	2021-02-19	0	0	0	0	0	2021-02-23
H2	38	2021-02-19	2021-02-24	2021-02-28	2021-03-03	2021-03-08	0.138
H2	39	2021-02-19	2021-02-24	2021-02-28	2021-03-04	2021-03-08	0.141
H2	40	2021-02-20	2021-02-28	0	0	0	0	2021-02-02
H2	41	2021-02-19	0	0	0	0	0	2021-02-23
H2	42	2021-02-22	2021-02-26	2021-03-01	2021-03-05	2021-03-10	0.14
H2	43	2021-02-20	2021-02-24	2021-02-28	2021-03-04	2021-03-09	0.146
H2	44	2021-02-22	2021-02-26	2021-03-02	2021-03-07	2021-03-11	0.142
H2	45	2021-02-22	2021-02-26	2021-03-01	2021-03-05	2021-03-09	0.143
H2	46	2021-02-22	2021-02-26	2021-03-01	2021-03-04	2021-03-08	0.095
H2	47	2021-05-08	2021-05-11	2021-05-16	2021-05-20	2021-05-24	0.164
H2	48	2021-05-09	2021-05-12	2021-05-16	0	0	0	2021-05-19
H2	49	2021-05-09	2021-05-14	0	0	0	0	2021-05-15
H2	50	2021-05-10	2021-05-14	2021-05-18	2021-05-23	2021-05-28	0.13
H2	51	2021-05-10	2021-05-14	2021-05-17	2021-05-23	2021-05-27	0.113
H2	52	2021-05-13	2021-05-17	0	0	0	0	2021-05-20
H2	53	2021-05-16	2021-05-21	0	0	0	0	2021-05-26
H2	54	2021-05-18	2021-05-23	2021-05-28	2021-06-02	2021-06-05	0.18
H2	55	2021-05-16	2021-05-22	2021-05-26	2021-05-30	2021-06-03	0.114
H2	56	2021-05-19	2021-05-23	2021-05-27	2021-05-31	2021-06-05	0.117
H2	57	2021-05-21	0	0	0	0	0	2021-05-23
H2	58	2021-05-17	2021-05-20	0	0	0	0	2021-05-27
H2	59	2021-05-19	2021-05-22	2021-05-27	2021-05-31	2021-06-06	0.121
H2	60	2021-05-17	2021-05-21	2021-05-26	2021-05-30	2021-06-04	0.114
H2	61	2021-05-17	2021-05-20	2021-05-25	2021-05-29	2021-06-02	0.154
H2	62	2021-05-17	2021-05-21	2021-05-25	2021-05-29	2021-06-06	0.085
H2	63	2021-05-17	0	0	0	0	0	2021-05-19
H2	64	2021-05-18	2021-05-23	2021-05-30	2021-06-02	2021-06-06	0.101
H2	65	2021-05-18	2021-05-25	2021-05-29	2021-06-05	2021-06-10	0.095
H2	66	2021-05-18	2021-05-23	2021-05-28	2021-05-31	2021-06-06	0.149
H2	67	2021-04-18	0	0	0	0	0	2021-04-22
H2	68	2021-04-19	2021-04-24	2021-04-27	2021-05-03	2021-05-07	0.09
H2	69	2021-04-19	0	0	0	0	0	2021-04-23
H2	70	2021-04-19	2021-04-24	2021-04-27	2021-05-01	2021-05-05	0.123
H2	71	2021-04-20	0	0	0	0	0	2021-04-22
H2	72	2021-04-20	0	0	0	0	0	2021-04-22
H2	73	2021-04-20	2021-04-24	2021-04-27	2021-05-01	2021-05-05	0.119
H2	74	2021-04-20	2021-04-24	2021-04-27	2021-05-01	2021-05-05	0.117
H2	75	2021-04-20	2021-04-25	2021-04-29	2021-05-04	2021-05-08	0.118
H2	76	2021-04-21	2021-04-27	2021-05-01	2021-05-03	2021-05-07	0.105
H2	77	2021-06-08	2021-06-13	2021-06-19	2021-06-22	2021-06-26	0.141
H2	78	2021-06-11	2021-06-16	2021-06-21	2021-06-26	2021-07-01	0.105
H2	79	2021-06-11	2021-06-19	2021-06-22	2021-06-26	2021-06-30	0.126
H2	80	2021-06-11	2021-06-16	2021-06-20	2021-06-24	2021-07-01	0.119
H2	81	2021-06-11	2021-06-16	2021-06-20	2021-06-24	2021-06-28	0.094
H2	82	2021-06-11	2021-06-14	2021-06-22	2021-06-25	2021-06-30	0.114
H2	83	2021-06-11	2021-06-16	2021-06-22	2021-06-25	2021-06-30	0.112
H2	84	2021-06-11	2021-06-20	2021-06-25	0	0	0	2021-06-29
H2	85	2021-06-11	2021-06-16	2021-06-21	2021-06-24	2021-06-29	0.121
H2	86	2021-06-12	2021-06-18	2021-06-22	2021-06-26	2021-06-30	0.127
H2	87	2021-04-20	2021-04-30	2021-05-03	2021-05-06	2021-05-11	0.135
H2	88	2021-04-18	2021-04-21	0	0	0	0	2021-04-27
H2	89	2021-04-18	2021-04-21	2021-04-26	2021-04-29	2021-05-03	0.133
H2	90	2021-04-21	2021-04-27	2021-04-30	2021-05-03	2021-05-08	0.151
H2	91	2021-04-18	2021-04-24	2021-04-27	2021-05-01	2021-05-05	0.139
H2	92	2021-04-18	2021-04-23	2021-04-26	2021-04-30	2021-05-03	0.145
H2	93	2021-04-18	2021-04-23	2021-04-26	2021-04-29	2021-05-04	0.113
H2	94	2021-04-20	2021-04-24	2021-04-27	2021-05-01	2021-05-04	0.131
H2	95	2021-04-19	2021-04-24	2021-04-27	2021-05-01	2021-05-05	0.112
H2	96	2021-04-22	2021-04-26	2021-04-29	2021-05-03	2021-05-06	0.133
H3	1	2021-02-11	2021-02-15	2021-02-19	2021-02-24	2021-03-01	0.095
H3	2	2021-02-15	2021-02-19	0	0	0	0	2021-02-22
H3	3	2021-02-11	2021-02-15	2021-02-19	2021-02-24	2021-03-01	0.096
H3	4	2021-02-14	0	0	0	0	0	2021-02-19
H3	5	2021-02-15	2021-02-21	0	0	0	0	2021-02-24
H3	6	2021-02-12	2021-02-16	2021-02-20	2021-02-24	2021-03-01	0.081
H3	7	2021-02-12	2021-02-17	2021-02-22	2021-02-27	0	0	2021-03-10
H3	8	2021-02-15	0	0	0	0	0	2021-02-20
H3	9	2021-02-12	2021-02-17	2021-02-20	2021-02-24	2021-02-28	0.125
H3	10	2021-02-13	0	0	0	0	0	2021-02-16
H3	11	2021-04-20	2021-04-25	2021-04-28	2021-05-02	2021-05-06	0.121
H3	12	2021-04-17	2021-04-23	2021-04-27	2021-05-01	2021-05-06	0.117
H3	13	2021-04-18	2021-04-23	2021-04-26	2021-05-02	2021-05-05	0.122
H3	14	2021-04-18	2021-04-23	2021-04-26	2021-04-30	2021-05-04	0.183
H3	15	2021-04-18	2021-04-23	2021-04-26	2021-04-30	2021-05-03	0.163
H3	16	2021-04-18	2021-04-23	2021-04-27	2021-04-30	2021-05-04	0.121
H3	17	2021-04-18	2021-04-23	2021-04-27	2021-04-30	2021-05-05	0.138
H3	18	2021-04-20	2021-04-25	2021-04-28	2021-05-01	2021-05-05	0.126
H3	19	2021-04-18	0	0	0	0	0	2021-04-24
H3	20	2021-04-18	2021-04-24	2021-04-27	2021-04-30	2021-05-04	0.153
H3	21	2021-05-07	2021-05-13	2021-05-16	2021-05-20	2021-05-25	0.106
H3	22	2021-05-07	2021-05-13	2021-05-16	2021-05-20	2021-05-25	0.126
H3	23	2021-06-08	2021-06-16	2021-06-21	2021-06-30	2021-07-08	0.067
H3	24	2021-05-08	2021-05-13	2021-05-16	2021-05-22	2021-05-27	0.108
H3	25	2021-05-08	0	0	0	0	0	2021-05-13
H3	26	2021-06-06	2021-06-11	2021-06-18	2021-06-22	2021-06-28	0.088
H3	27	2021-05-09	2021-06-13	0	0	0	0	2021-05-18
H3	28	2021-06-03	2021-06-08	2021-06-13	2021-06-20	2021-06-25	0.102
H3	29	2021-06-03	2021-06-08	0	0	0	0	2021-06-10
H3	30	2021-06-07	0	0	0	0	0	2021-06-12
H3	31	2021-02-20	0	0	0	0	0	2021-02-23
H3	32	2021-02-18	0	0	0	0	0	2021-02-23
H3	33	2021-02-23	2021-03-01	2021-03-04	2021-03-09	2021-03-14	0.1
H3	34	2021-02-21	2021-02-28	2021-03-04	2021-03-09	2021-03-14	0.144
H3	35	2021-02-18	2021-02-22	2021-02-26	2021-03-01	2021-03-06	0.117
H3	36	2021-02-18	2021-02-25	2021-02-28	2021-03-04	2021-03-08	0.161
H3	37	2021-02-19	0	0	0	0	0	2021-02-23
H3	38	2021-02-23	2021-02-28	2021-03-03	2021-03-08	2021-03-13	0.14
H3	39	2021-02-19	2021-02-23	2021-02-27	2021-03-03	2021-03-08	0.125
H3	40	2021-02-19	2021-02-23	2021-02-28	2021-03-04	2021-03-08	0.091
H3	41	2021-05-16	2021-05-22	2021-05-27	2021-05-30	2021-06-03	0.181
H3	42	2021-05-16	2021-05-22	2021-05-27	2021-06-02	2021-06-07	0.114
H3	43	2021-05-17	2021-05-22	2021-05-30	2021-06-03	2021-06-07	0.111
H3	44	2021-04-20	2021-04-24	2021-04-28	2021-05-02	2021-05-05	0.151
H3	45	2021-04-21	2021-04-26	2021-04-29	2021-05-03	2021-05-07	0.194
H3	46	2021-04-20	2021-04-26	2021-04-29	2021-05-03	2021-05-07	0.15
H3	47	2021-04-20	2021-04-26	2021-04-29	2021-05-02	2021-05-06	0.169
H3	48	2021-04-20	2021-04-25	2021-04-28	2021-05-02	2021-05-06	0.147
H3	49	2021-04-21	2021-04-26	2021-04-29	2021-05-03	2021-05-07	0.168
H3	50	2021-04-21	2021-04-27	2021-05-02	2021-05-06	2021-05-10	0.156
H3	51	2021-04-21	2021-04-26	2021-04-29	2021-05-03	2021-05-07	0.149
H3	52	2021-04-21	2021-04-26	2021-04-30	2021-05-04	2021-05-09	0.101
H3	53	2021-04-21	2021-04-26	2021-04-29	2021-05-03	2021-05-07	0.132
H3	54	2021-02-19	2021-02-26	2021-03-02	2021-03-07	2021-03-12	0.161
H3	55	2021-02-25	2021-03-01	2021-03-05	2021-03-09	2021-03-14	0.096
H3	56	2021-02-20	2021-02-26	0	0	0	0	2021-02-28
H3	57	2021-02-24	2021-02-28	2021-03-06	2021-03-11	2021-03-17	0.097
H3	58	2021-02-20	2021-02-24	2021-02-28	2021-03-04	2021-03-09	0.124
H3	59	2021-02-20	2021-02-25	2021-02-28	2021-03-04	2021-03-11	0.141
H3	60	2021-02-20	2021-02-24	2021-02-28	2021-03-03	2021-03-08	0.132
H3	61	2021-02-26	0	0	0	0	0	2021-02-28
H3	62	2021-02-22	2021-02-26	2021-03-02	2021-03-07	2021-03-12	0.132
H3	63	2021-02-20	2021-02-24	2021-03-01	2021-03-05	2021-03-11	0.141
H3	64	2021-05-04	2021-05-08	2021-05-11	2021-05-15	2021-05-19	0.104
H3	65	2021-05-04	2021-05-07	2021-05-10	2021-05-15	2021-05-18	0.149
H3	66	2021-05-05	2021-05-09	2021-05-12	2021-05-17	2021-05-21	0.15
H3	67	2021-05-07	2021-05-10	2021-05-13	2021-05-17	2021-05-22	0.146
H3	68	2021-05-10	2021-05-14	2021-05-18	2021-05-25	2021-05-31	0.11
H3	69	2021-05-06	0	0	0	0	0	2021-05-11
H3	70	2021-05-11	0	0	0	0	0	2021-05-15
H3	71	2021-05-06	0	0	0	0	0	2021-05-10
H3	72	2021-05-07	2021-05-13	2021-05-17	0	0	0	2021-05-18
H3	73	2021-05-07	2021-05-12	2021-05-16	2021-05-20	2021-05-25	0.119
H3	74	2021-05-08	2021-05-12	2021-05-15	0	0	0	2021-05-20
H3	75	2021-05-08	2021-05-11	2021-05-14	2021-05-19	2021-05-25	0.101
H3	76	2021-05-08	0	0	0	0	0	2021-05-10
H3	77	2021-05-08	2021-05-13	2021-05-16	2021-05-20	2021-05-25	0.143
H3	78	2021-05-08	2021-05-11	2021-05-14	2021-05-18	2021-05-22	0.129
H3	79	2021-05-17	2021-05-23	2021-05-28	2021-05-31	2021-06-04	0.142
H3	80	2021-05-17	2021-05-20	2021-05-25	2021-05-29	2021-06-02	0.123
H3	81	2021-05-21	0	0	0	0	0	2021-05-30
H3	82	2021-05-21	2021-05-26	0	0	0	0	2021-05-31
H3	83	2021-05-21	2021-05-26	2021-06-01	2021-06-06	2021-06-09	0.123
H3	84	2021-05-21	2021-05-30	2021-06-02	0	0	0	2021-06-05
H3	85	2021-05-21	2021-05-26	2021-05-31	2021-06-03	2021-06-06	0.117
H3	86	2021-05-22	2021-05-27	2021-05-31	2021-06-03	2021-06-08	0.123
H3	87	2021-05-22	2021-05-27	2021-05-31	2021-06-04	2021-06-08	0.105
H3	88	2021-05-22	2021-05-28	2021-05-31	2021-06-03	2021-06-09	0.113
